# Supplementary material
Source: PubMed Central journal article supplement (PMC6286709)
Supplement: NIHMS953428-supplement-Table_S1.pdf [file NIHMS953428-supplement-Table_S1.pdf]

Table S1. Well-characterized inborn errors of metabolism.

| Group/Name of IEM                                                                                                       | Alternative names                                                                                                     | Inheritance | Gene          | OMIM gene number |
|-------------------------------------------------------------------------------------------------------------------------|-----------------------------------------------------------------------------------------------------------------------|-------------|---------------|------------------|
| <b>A. DISORDERS OF NITROGEN-CONTAINING COMPOUNDS</b>                                                                    |                                                                                                                       |             |               |                  |
| <b>1. Disorders of pyrimidine metabolism</b>                                                                            |                                                                                                                       |             |               |                  |
| CAD trifunctional protein deficiency                                                                                    |                                                                                                                       | AR          | <i>CAD</i>    | 114010           |
| Dihydroorotate dehydrogenase deficiency                                                                                 | Postaxial acrofacial dysostosis; Miller syndrome; Genée–Wiedemann syndrome                                            | AR          | <i>DHODH</i>  | 126064           |
| Uridine monophosphate synthase deficiency                                                                               | Hereditary orotic aciduria                                                                                            | AR          | <i>UMPS</i>   | 613891           |
| Cytosolic pyrimidine 5'-nucleotidase deficiency                                                                         | Uridine 5'-monophosphate hydrolase 1 deficiency                                                                       | AR          | <i>NT5C3A</i> | 606224           |
| Activation-induced cytidine deaminase deficiency                                                                        | Hyper-IgM syndrome type 2                                                                                             | AR          | <i>AICDA</i>  | 605257           |
| Uracil-DNA glycosylase deficiency                                                                                       | Hyper-IgM syndrome type 5                                                                                             | AR          | <i>UNG</i>    | 191525           |
| See also: Dihydropyrimidine dehydrogenase, dihydropyrimidinase, and $\beta$ -ureidopropionase deficiencies in group 17. |                                                                                                                       |             |               |                  |
| <b>2. Disorders of purine metabolism</b>                                                                                |                                                                                                                       |             |               |                  |
| Phosphoribosylpyrophosphate synthetase superactivity                                                                    |                                                                                                                       | XLR         | <i>PRPS1</i>  | 311850           |
| Phosphoribosylpyrophosphate synthetase deficiency                                                                       | Arts syndrome (severe); X-linked Charcot-Marie-Tooth disease type 5 (intermediate); X-linked deafness type 1 (milder) | XLR         | <i>PRPS1</i>  | 311850           |
| Adenylosuccinate lyase deficiency                                                                                       |                                                                                                                       | AR          | <i>ADSL</i>   | 608222           |
| Muscle adenosine monophosphate deaminase 1 deficiency                                                                   | Myoadenylate deaminase deficiency                                                                                     | AR          | <i>AMPD1</i>  | 102770           |
| Adenosine monophosphate deaminase 2 deficiency                                                                          | Pontocerebellar hypoplasia type 9 (severe); autosomal recessive spastic paraplegia type 63 (milder)                   | AR          | <i>AMPD2</i>  | 102771           |
| Erythrocyte adenosine monophosphate deaminase 3 deficiency                                                              |                                                                                                                       | AR          | <i>AMPD3</i>  | 102772           |
| Adenosine deaminase 1 deficiency                                                                                        |                                                                                                                       | AR          | <i>ADA</i>    | 608958           |
| Adenosine deaminase 2 deficiency                                                                                        |                                                                                                                       | AR          | <i>ADA2</i>   | 607575           |
| Purine nucleoside phosphorylase deficiency                                                                              |                                                                                                                       | AR          | <i>PNP</i>    | 164050           |
| Xanthine oxidase deficiency                                                                                             | Xanthinuria type 1                                                                                                    | AR          | <i>XDH</i>    | 607633           |

|                                                           |                                                                                                                |        |                 |        |
|-----------------------------------------------------------|----------------------------------------------------------------------------------------------------------------|--------|-----------------|--------|
| Hypoxanthine guanine phosphoribosyltransferase deficiency | Lesch-Nyhan syndrome (severe); Kelley-Seegmiller syndrome (milder)                                             | XLR    | <i>HPRT1</i>    | 308000 |
| Adenine phosphoribosyltransferase deficiency              |                                                                                                                | AR     | <i>APRT</i>     | 102600 |
| Adenylate kinase 1 deficiency                             |                                                                                                                | AR     | <i>AK1</i>      | 103000 |
| Adenylate kinase 2 deficiency                             | Reticular dysgenesis                                                                                           | AR     | <i>AK2</i>      | 103020 |
| Inosine-5'-monophosphate dehydrogenase deficiency         | Retinitis pigmentosa type 10; Leber congenital amaurosis type 11                                               | AD     | <i>IMPDH1</i>   | 146690 |
| Thiopurine methyltransferase deficiency                   |                                                                                                                | AR     | <i>TPMT</i>     | 187680 |
| Inosine triphosphatase deficiency                         | Early infantile epileptic encephalopathy type 35                                                               | AR     | <i>ITPA</i>     | 147520 |
| Urate transporter 1 deficiency                            | Hereditary renal hypouricemia type 1                                                                           | AR     | <i>SLC22A12</i> | 607096 |
| Urate voltage-driven efflux transporter 1 deficiency      | Hereditary renal hypouricemia type 2                                                                           | AR     | <i>SLC2A9</i>   | 606142 |
| <b>3. Disorders of nucleotide metabolism</b>              |                                                                                                                |        |                 |        |
| 3' repair exonuclease 1 deficiency                        | Aicardi-Goutières syndrome type 1; familial chilblain lupus; retinal vasculopathy with cerebral leukodystrophy | AD, AR | <i>TREX1</i>    | 606609 |
| Ribonuclease H2 subunit B deficiency                      | Aicardi-Goutières syndrome type 2                                                                              | AR     | <i>RNASEH2B</i> | 610326 |
| Ribonuclease H2 subunit C deficiency                      | Aicardi-Goutières syndrome type 3                                                                              | AR     | <i>RNASEH2C</i> | 610330 |
| Ribonuclease H2 subunit A deficiency                      | Aicardi-Goutières syndrome type 1                                                                              | AR     | <i>RNASEH2A</i> | 606034 |
| Ribonuclease T2 deficiency                                | Cystic leukoencephalopathy without megalencephaly                                                              | AR     | <i>RNASET2</i>  | 612944 |
| SAMHD1 deficiency                                         | Aicardi-Goutières syndrome type 5; stenosis, aneurysm, moyamoya and stroke (SAMS association)                  | AR     | <i>SAMHD1</i>   | 606754 |
| RNA-specific adenosine deaminase deficiency               | Aicardi-Goutières syndrome type 6 (recessive); dyschromatosis symmetrica hereditaria (dominant)                | AD, AR | <i>ADAR</i>     | 146920 |
| MDA5 superactivity                                        | Aicardi-Goutières syndrome type 7; Singleton-Merten syndrome type 1                                            | AD     | <i>IFIH1</i>    | 606951 |
| STING superactivity                                       | STING-associated vasculopathy with onset in infancy (SAVI)                                                     | AD     | <i>TMEM173</i>  | 612374 |
| 2',5'-oligoadenylate synthetase 1 deficiency              | Infantile-onset pulmonary alveolar proteinosis with hypogammaglobulinemia                                      | AD     | <i>OAS1</i>     | 164350 |
| ABCC6 deficiency                                          | Generalized arterial calcification of infancy type 2 (severe); pseudoxanthoma elasticum (milder)               | AR     | <i>ABCC6</i>    | 603234 |

|                                                                            |                                                                                                           |        |                |        |
|----------------------------------------------------------------------------|-----------------------------------------------------------------------------------------------------------|--------|----------------|--------|
| Ectonucleotide pyrophosphatase/phosphodiesterase 1 deficiency              | Generalized arterial calcification of infancy type 1; autosomal recessive hypophosphatemic rickets type 2 | AR     | <i>ENPP1</i>   | 173335 |
| Ectonucleotide pyrophosphatase/phosphodiesterase 1 dimerization deficiency | Cole disease                                                                                              | AD, AR | <i>ENPP1</i>   | 173335 |
| Ecto-5'-nucleotidase deficiency                                            | Arterial calcification due to deficiency of CD73 (ACDC)                                                   | AR     | <i>NT5E</i>    | 129190 |
| Equilibrative nucleoside transporter 1 deficiency                          |                                                                                                           | AR     | <i>SLC29A1</i> | 602193 |
| Equilibrative nucleoside transporter 3 deficiency                          | H syndrome; familial Rosai-Dorman disease; Faisalabad histiocytosis                                       | AR     | <i>SLC29A3</i> | 612373 |
| <b>4. Disorders of creatine metabolism</b>                                 |                                                                                                           |        |                |        |
| Arginine:glycine amidinotransferase deficiency                             | Cerebral creatine deficiency syndrome type 3                                                              | AR     | <i>GATM</i>    | 602360 |
| Guanidinoacetate methyltransferase deficiency                              | Cerebral creatine deficiency syndrome type 2                                                              | AR     | <i>GAMT</i>    | 601240 |
| Creatine transporter deficiency                                            | Cerebral creatine deficiency syndrome type 1                                                              | XL     | <i>SLC6A8</i>  | 300036 |
| <b>5. Disorders of choline metabolism</b>                                  |                                                                                                           |        |                |        |
| Dimethylglycine dehydrogenase deficiency                                   | Dimethylglycinuria                                                                                        | AR     | <i>DMGDH</i>   | 605849 |
| Sarcosine dehydrogenase deficiency                                         | Sarcosinemia                                                                                              | AR     | <i>SARDH</i>   | 604455 |
| Flavin monooxygenase 3 deficiency                                          | Primary trimethylaminuria                                                                                 | AR     | <i>FMO3</i>    | 136132 |
| <b>6. Disorders of glutathione metabolism</b>                              |                                                                                                           |        |                |        |
| $\gamma$ -glutamylcysteine synthetase deficiency                           | Glutamate-cysteine ligase deficiency                                                                      | AR     | <i>GCLC</i>    | 606857 |
| Glutathione synthetase deficiency                                          |                                                                                                           | AR     | <i>GSS</i>     | 601002 |
| 5-Oxoprolinase deficiency                                                  |                                                                                                           | AR     | <i>OPLAH</i>   | 614243 |
| Glutathione reductase deficiency                                           |                                                                                                           | AR     | <i>GSR</i>     | 138300 |
| Glutathione peroxidase 4 deficiency                                        | Spondylometaphyseal dysplasia, Sedaghatian type                                                           | AR     | <i>GPX4</i>    | 138322 |
| NRF2 superactivity                                                         | Immunodeficiency, developmental delay, and hypohomocysteinemia (IEMDHH)                                   | AD     | <i>NFE2L2</i>  | 600492 |
| <b>7. Disorders of ammonia detoxification</b>                              |                                                                                                           |        |                |        |
| N-acetylglutamate synthase deficiency                                      |                                                                                                           | AR     | <i>NAGS</i>    | 608300 |
| Carbamoylphosphate synthetase I deficiency                                 |                                                                                                           | AR     | <i>CPS1</i>    | 608307 |

|                                                                                                                                                                                                                                                                                                                                                                                                                                                                                                                                                       |                                                                                                    |                 |                                         |                        |
|-------------------------------------------------------------------------------------------------------------------------------------------------------------------------------------------------------------------------------------------------------------------------------------------------------------------------------------------------------------------------------------------------------------------------------------------------------------------------------------------------------------------------------------------------------|----------------------------------------------------------------------------------------------------|-----------------|-----------------------------------------|------------------------|
| Ornithine transcarbamylase deficiency                                                                                                                                                                                                                                                                                                                                                                                                                                                                                                                 |                                                                                                    | XL              | <i>OTC</i>                              | 300461                 |
| Argininosuccinate synthetase deficiency                                                                                                                                                                                                                                                                                                                                                                                                                                                                                                               | Citrullinemia                                                                                      | AR              | <i>ASS1</i>                             | 603470                 |
| Argininosuccinate lyase deficiency                                                                                                                                                                                                                                                                                                                                                                                                                                                                                                                    | Argininosuccinase deficiency; argininosuccinic aciduria                                            | AR              | <i>ASL</i>                              | 608310                 |
| Arginase deficiency                                                                                                                                                                                                                                                                                                                                                                                                                                                                                                                                   | Argininemia                                                                                        | AR              | <i>ARG1</i>                             | 608313                 |
| Mitochondrial ornithine transporter deficiency                                                                                                                                                                                                                                                                                                                                                                                                                                                                                                        | Hyperornithinemia-hyperammonemia-homocitrullinemia syndrome; ornithine translocase deficiency      | AR              | <i>SLC25A15</i>                         | 603861                 |
| Citrin deficiency                                                                                                                                                                                                                                                                                                                                                                                                                                                                                                                                     | Mitochondrial aspartate-glutamate carrier isoform 2 deficiency                                     | AR              | <i>SLC25A13</i>                         | 603859                 |
| Carbonic anhydrase VA deficiency                                                                                                                                                                                                                                                                                                                                                                                                                                                                                                                      |                                                                                                    | AR              | <i>CA5A</i>                             | 114761                 |
| See also: Lysinuric protein intolerance in group 8, $\delta$ -1-pyrroline-5-carboxylate synthase and ornithine aminotransferase deficiencies in group 16, glutamate dehydrogenase superactivity in group 20, glutamine synthetase deficiency in group 21, pyruvate carboxylase deficiency in group 52, and transmembrane protein 70 deficiency in group 67.                                                                                                                                                                                           |                                                                                                    |                 |                                         |                        |
| <b>8. Disorders of amino acid transport</b>                                                                                                                                                                                                                                                                                                                                                                                                                                                                                                           |                                                                                                    |                 |                                         |                        |
| Hartnup disorder                                                                                                                                                                                                                                                                                                                                                                                                                                                                                                                                      |                                                                                                    | AR              | <i>SLC6A19</i>                          | 608893                 |
| Iminoglycinuria                                                                                                                                                                                                                                                                                                                                                                                                                                                                                                                                       |                                                                                                    | AR (or digenic) | <i>SLC36A2</i> ( $\pm$ <i>SLC6A20</i> ) | 608331 ( $\pm$ 605616) |
| Hyperglycinuria                                                                                                                                                                                                                                                                                                                                                                                                                                                                                                                                       |                                                                                                    | AD              | <i>SLC36A2</i>                          | 608331                 |
| Cystinuria type A                                                                                                                                                                                                                                                                                                                                                                                                                                                                                                                                     |                                                                                                    | AR              | <i>SLC3A1</i>                           | 104614                 |
| Cystinuria type B                                                                                                                                                                                                                                                                                                                                                                                                                                                                                                                                     |                                                                                                    | AD, AR          | <i>SLC7A9</i>                           | 604144                 |
| Lysinuric protein intolerance                                                                                                                                                                                                                                                                                                                                                                                                                                                                                                                         | Dibasic aminoaciduria type 2                                                                       | AR              | <i>SLC7A7</i>                           | 603593                 |
| Dicarboxylic aminoaciduria                                                                                                                                                                                                                                                                                                                                                                                                                                                                                                                            |                                                                                                    | AR              | <i>SLC1A1</i>                           | 133550                 |
| Large neutral amino acid transporter deficiency                                                                                                                                                                                                                                                                                                                                                                                                                                                                                                       |                                                                                                    | AR              | <i>SLC7A5</i>                           | 600182                 |
| Neuronal system A amino acid transporter deficiency                                                                                                                                                                                                                                                                                                                                                                                                                                                                                                   | Foveal hypoplasia type 2 with or without optic nerve misrouting and/or anterior segment dysgenesis | AR              | <i>SLC38A8</i>                          | 615585                 |
| See also: Mitochondrial ornithine transporter and citrin deficiencies in group 7, GABA transporter deficiency in group 17, glutamate aspartate transporter, astroglial glutamate aspartate transporter, and mitochondrial glutamate transporter deficiencies in group 20, ASCT1 transporter deficiency in group 23, glycine transporter 1, glycine transporter 2, and mitochondrial glycine transporter deficiencies in group 24, mitochondrial aspartate-glutamate carrier isoform 1 deficiency in group 57, and cystinosin deficiency in group 107. |                                                                                                    |                 |                                         |                        |
| <b>9. Aminoacylase deficiencies</b>                                                                                                                                                                                                                                                                                                                                                                                                                                                                                                                   |                                                                                                    |                 |                                         |                        |
| Aspartoacylase deficiency                                                                                                                                                                                                                                                                                                                                                                                                                                                                                                                             | Canavan disease; aminoacylase 2 deficiency                                                         | AR              | <i>ASPA</i>                             | 608034                 |
| Aminoacylase 1 deficiency                                                                                                                                                                                                                                                                                                                                                                                                                                                                                                                             |                                                                                                    | AR              | <i>ACY1</i>                             | 104620                 |
| <b>10. Disorders of monoamine metabolism</b>                                                                                                                                                                                                                                                                                                                                                                                                                                                                                                          |                                                                                                    |                 |                                         |                        |

|                                                                          |                                                                                                           |        |                |        |
|--------------------------------------------------------------------------|-----------------------------------------------------------------------------------------------------------|--------|----------------|--------|
| Tyrosine hydroxylase deficiency                                          |                                                                                                           | AR     | <i>TH</i>      | 191290 |
| Aromatic L-amino acid decarboxylase deficiency                           | DOPA decarboxylase deficiency                                                                             | AR     | <i>DDC</i>     | 107930 |
| Dopamine $\beta$ -hydroxylase deficiency                                 |                                                                                                           | AR     | <i>DBH</i>     | 609312 |
| Monoamine oxidase A deficiency                                           | Brunner syndrome                                                                                          | XLR    | <i>MAOA</i>    | 309850 |
| Dopamine transporter deficiency                                          | Infantile Parkinsonism-dystonia                                                                           | AR     | <i>SLC6A3</i>  | 126455 |
| Vesicular monoamine transporter 2 deficiency                             |                                                                                                           | AR     | <i>SLC18A2</i> | 193001 |
| <b>11. Disorders of phenylalanine and tetrahydrobiopterin metabolism</b> |                                                                                                           |        |                |        |
| Phenylalanine hydroxylase deficiency                                     | Phenylketonuria                                                                                           | AR     | <i>PAH</i>     | 612349 |
| Autosomal recessive GTP cyclohydrolase 1 deficiency                      |                                                                                                           | AR     | <i>GCH1</i>    | 600225 |
| Autosomal dominant GTP cyclohydrolase 1 deficiency                       | Segawa syndrome; dystonia type 5A                                                                         | AD     | <i>GCH1</i>    | 600225 |
| 6-pyruvoyl-tetrahydropterin synthase deficiency                          |                                                                                                           | AR     | <i>PTS</i>     | 612719 |
| Sepiapterin reductase deficiency                                         |                                                                                                           | AD, AR | <i>SPR</i>     | 182125 |
| Dihydropteridine reductase deficiency                                    |                                                                                                           | AR     | <i>QDPR</i>    | 612676 |
| Pterin-4- $\alpha$ -carbinolamine dehydratase deficiency                 | Primapterinuria; maturity-onset diabetes of the young (MODY) with hypomagnesemia and renal magnesium loss | AR     | <i>PCBD1</i>   | 126090 |
| DNAJC12 deficiency                                                       | Non-tetrahydrobiopterin-deficient hyperphenylalaninemia                                                   | AR     | <i>DNAJC12</i> | 606060 |
| <b>12. Disorders of tyrosine metabolism</b>                              |                                                                                                           |        |                |        |
| Tyrosinase deficiency                                                    | Oculocutaneous albinism type 1                                                                            | AR     | <i>TYR</i>     | 606933 |
| Tyrosine aminotransferase deficiency                                     | Tyrosinemia type 2; Richner-Hanhart syndrome                                                              | AR     | <i>TAT</i>     | 613018 |
| 4-hydroxyphenylpyruvate dioxygenase deficiency                           | Tyrosinemia type 3                                                                                        | AR     | <i>HPD</i>     | 609695 |
| Hawkinsinuria                                                            |                                                                                                           | AD     | <i>HPD</i>     | 609695 |
| Homogentisic acid oxidase deficiency                                     | Alkaptonuria                                                                                              | AR     | <i>HGD</i>     | 607474 |
| Maleylacetoacetate isomerase deficiency                                  | Benign hypersuccinylacetoneemia                                                                           | AR     | <i>GSTZ1</i>   | 603758 |
| Fumarylacetoacetase deficiency                                           | Tyrosinemia type 1                                                                                        | AR     | <i>FAH</i>     | 613871 |
| <b>13. Disorders of sulfur amino acid and sulfide metabolism</b>         |                                                                                                           |        |                |        |
| Methionine adenosyltransferase I/III deficiency                          | Mudd's disease                                                                                            | AR     | <i>MAT1A</i>   | 610550 |

|                                                              |                                                                                       |    |                 |        |
|--------------------------------------------------------------|---------------------------------------------------------------------------------------|----|-----------------|--------|
| Autosomal dominant hypermethioninemia                        |                                                                                       | AD | <i>MAT1A</i>    | 610550 |
| Glycine N-methyltransferase deficiency                       |                                                                                       | AR | <i>GNMT</i>     | 606628 |
| S-adenosylhomocysteine hydrolase deficiency                  |                                                                                       | AR | <i>AHCY</i>     | 180960 |
| Adenosine kinase deficiency                                  |                                                                                       | AR | <i>ADK</i>      | 102750 |
| Cystathionine $\beta$ -synthase deficiency                   | Classical homocystinuria                                                              | AR | <i>CBS</i>      | 613381 |
| Cystathionine $\gamma$ -lyase deficiency                     | Cystathioninuria                                                                      | AR | <i>CTH</i>      | 607657 |
| Methanethiol oxidase deficiency                              | Extraoral halitosis                                                                   | AR | <i>SELENBP1</i> | 604188 |
| Isolated sulfite oxidase deficiency                          | Sulfocysteinuria                                                                      | AR | <i>SUOX</i>     | 606887 |
| Mitochondrial sulfur dioxygenase deficiency                  | Ethylmalonic encephalopathy                                                           | AR | <i>ETHE1</i>    | 608451 |
| <b>14. Disorders of branched-chain amino acid metabolism</b> |                                                                                       |    |                 |        |
| Branched-chain aminotransferase 2 deficiency                 | Hypervalinemia and hyperleucine-isoleucinemia                                         | AR | <i>BCAT2</i>    | 113530 |
| Branched-chain ketoacid dehydrogenase E1 $\alpha$ deficiency | Maple syrup urine disease type 1a                                                     | AR | <i>BCKDHA</i>   | 608348 |
| Branched-chain ketoacid dehydrogenase E1 $\beta$ deficiency  | Maple syrup urine disease type 1b                                                     | AR | <i>BCKDHB</i>   | 248611 |
| Dihydrolipoyl transacylase deficiency                        | Maple syrup urine disease type 2; branched-chain ketoacid dehydrogenase E2 deficiency | AR | <i>DBT</i>      | 248610 |
| Dihydrolipoamide dehydrogenase deficiency                    | E3 deficiency                                                                         | AR | <i>DLD</i>      | 238331 |
| Branched-chain ketoacid dehydrogenase kinase deficiency      |                                                                                       | AR | <i>BCKDK</i>    | 614901 |
| Isovaleryl-CoA dehydrogenase deficiency                      | Isovaleric acidemia                                                                   | AR | <i>IVD</i>      | 607036 |
| Isobutyryl-CoA dehydrogenase deficiency                      |                                                                                       | AR | <i>ACAD8</i>    | 604773 |
| 2-Methylbutyryl-CoA dehydrogenase deficiency                 | Short/branched-chain acyl-CoA dehydrogenase deficiency; 2-methylbutyrylglycinuria     | AR | <i>ACADSB</i>   | 600301 |
| 3-Methylcrotonyl-CoA carboxylase 1 deficiency                | 3-methylcrotonylglycinuria type 1                                                     | AR | <i>MCCC1</i>    | 609010 |
| 3-Methylcrotonyl-CoA carboxylase 2 deficiency                | 3-methylcrotonylglycinuria type 2                                                     | AR | <i>MCCC2</i>    | 609014 |
| 3-methylglutaconyl-CoA hydratase deficiency                  | 3-methylglutaconic aciduria type 1                                                    | AR | <i>AUH</i>      | 600529 |

|                                                                                                                                          |                                                                              |        |                 |        |
|------------------------------------------------------------------------------------------------------------------------------------------|------------------------------------------------------------------------------|--------|-----------------|--------|
| Mitochondrial short-chain enoyl-CoA hydratase 1 deficiency                                                                               | Crotonase deficiency                                                         | AR     | <i>ECHS1</i>    | 602292 |
| 3-hydroxyisobutyryl-CoA hydrolase deficiency                                                                                             | $\beta$ -hydroxyisobutyryl-CoA deacylase deficiency                          | AR     | <i>HIBCH</i>    | 610690 |
| HSD10 disease                                                                                                                            | 2-methyl-3-hydroxybutyryl-CoA dehydrogenase deficiency                       | AR     | <i>HSD17B10</i> | 300256 |
| 3-Hydroxy-3-methylglutaryl-CoA lyase deficiency                                                                                          | Hydroxymethylglutaric aciduria                                               | AR     | <i>HMGCL</i>    | 613898 |
| Methylmalonate semialdehyde dehydrogenase deficiency                                                                                     |                                                                              | AR     | <i>ALDH6A1</i>  | 603178 |
| Propionic acidemia due to propionyl-CoA carboxylase $\alpha$ subunit deficiency                                                          |                                                                              | AR     | <i>PCCA</i>     | 232000 |
| Propionic acidemia due to propionyl-CoA carboxylase $\beta$ subunit deficiency                                                           |                                                                              | AR     | <i>PCCB</i>     | 232050 |
| Methylmalonyl-CoA epimerase deficiency                                                                                                   |                                                                              | AR     | <i>MCEE</i>     | 608419 |
| Methylmalonic aciduria due to methylmalonyl-CoA mutase deficiency                                                                        |                                                                              | AR     | <i>MUT</i>      | 609058 |
| Acyl-CoA synthetase family member 3 deficiency                                                                                           | Combined malonic and methylmalonic aciduria                                  | AR     | <i>ACSF3</i>    | 614245 |
| Malonyl-CoA decarboxylase deficiency                                                                                                     | Malonic aciduria                                                             | AR     | <i>MLYCD</i>    | 606761 |
| See also: Large neutral amino acid transporter deficiency in group 8, and mitochondrial acetoacetyl-CoA thiolase deficiency in group 84. |                                                                              |        |                 |        |
| <b>15. Disorders of lysine metabolism</b>                                                                                                |                                                                              |        |                 |        |
| $\alpha$ -amino adipic semialdehyde synthase deficiency                                                                                  | Familial hyperlysinemia; saccharopinuria                                     | AR     | <i>AASS</i>     | 605113 |
| $\alpha$ -amino adipic semialdehyde dehydrogenase deficiency                                                                             | Pyridoxine-dependent epilepsy                                                | AR     | <i>ALDH7A1</i>  | 107323 |
| 2-amino adipic 2-oxoadipic aciduria                                                                                                      |                                                                              | AR     | <i>DHTKD1</i>   | 614984 |
| Charcot-Marie-Tooth disease type 2Q                                                                                                      |                                                                              | AD     | <i>DHTKD1</i>   | 614984 |
| Glutaryl-CoA dehydrogenase deficiency                                                                                                    | Glutaric acidemia type 1                                                     | AR     | <i>GCDH</i>     | 608801 |
| Succinate-hydroxymethylglutarate-CoA transferase deficiency                                                                              | Glutaric acidemia type 3                                                     | AR     | <i>SUGCT</i>    | 609187 |
| 5-phosphohydroxylysine phospholyase                                                                                                      | Phosphohydroxylysinuria                                                      | AR     | <i>PHYKPL</i>   | 614683 |
| <b>16. Disorders of proline and ornithine metabolism</b>                                                                                 |                                                                              |        |                 |        |
| $\delta$ -1-pyrroline-5-carboxylate synthase deficiency, cutis laxa phenotype                                                            | Autosomal recessive cutis laxa type 3A; autosomal dominant cutis laxa type 3 | AD, AR | <i>ALDH18A1</i> | 138250 |

|                                                                               |                                                                                               |        |                 |        |
|-------------------------------------------------------------------------------|-----------------------------------------------------------------------------------------------|--------|-----------------|--------|
| δ-1-pyrroline-5-carboxylate synthase deficiency, spastic paraplegia phenotype | Autosomal dominant spastic paraplegia type 9A; autosomal recessive spastic paraplegia type 9B | AD, AR | <i>ALDH18A1</i> | 138250 |
| Pyrroline-5-carboxylate reductase 1 deficiency                                | Autosomal recessive cutis laxa type 2B; autosomal recessive cutis laxa type 3B                | AR     | <i>PYCR1</i>    | 179035 |
| Pyrroline-5-carboxylate reductase 2 deficiency                                | Hypomyelinating leukodystrophy type 10                                                        | AR     | <i>PYCR2</i>    | 616406 |
| Proline dehydrogenase deficiency                                              | Proline oxidase deficiency; hyperprolinemia type 1                                            | AR     | <i>PRODH</i>    | 606810 |
| Pyrroline-5-carboxylate dehydrogenase deficiency                              | Hyperprolinemia type 2                                                                        | AR     | <i>ALDH4A1</i>  | 606811 |
| Hydroxyproline dehydrogenase deficiency                                       | Hydroxyprolinemia                                                                             | AR     | <i>PRODH2</i>   | 616377 |
| Prolidase deficiency                                                          |                                                                                               | AR     | <i>PEPD</i>     | 613230 |
| X-prolyl aminopeptidase 3 deficiency                                          | Nephronophthisis-like nephropathy type 1                                                      | AR     | <i>XPNPEP3</i>  | 613553 |
| Ornithine aminotransferase deficiency                                         | Gyrate atrophy of choroid and retina                                                          | AR     | <i>OAT</i>      | 613349 |
| Spermine synthase deficiency                                                  | Snyder-Robinson syndrome                                                                      | AR     | <i>SMS</i>      | 300105 |
| See also: 4-hydroxy-2-oxoglutarate aldolase 1 deficiency in group 114.        |                                                                                               |        |                 |        |
| <b>17. Disorders of β- and γ-amino acids</b>                                  |                                                                                               |        |                 |        |
| Dihydropyrimidine dehydrogenase deficiency                                    |                                                                                               | AR     | <i>DPYD</i>     | 612779 |
| Dihydropyrimidinase deficiency                                                | Dihydropyrimidinuria                                                                          | AR     | <i>DPYS</i>     | 613326 |
| β-ureidopropionase deficiency                                                 | β-alanine synthase deficiency                                                                 | AR     | <i>UPB1</i>     | 606673 |
| Hyper-β-aminoisobutyric aciduria                                              |                                                                                               | AR     | <i>AGXT2</i>    | 612471 |
| GABA transaminase deficiency                                                  |                                                                                               | AR     | <i>ABAT</i>     | 137150 |
| Succinic semialdehyde dehydrogenase deficiency                                | 4-hydroxybutyric aciduria                                                                     | AR     | <i>ALDH5A1</i>  | 610045 |
| GABA transporter deficiency                                                   | Myoclonic-atonic epilepsy                                                                     | AD     | <i>SLC6A1</i>   | 137165 |
| GABA type A receptor α1 subunit deficiency                                    | Early infantile epileptic encephalopathy type 19                                              | AD     | <i>GABRA1</i>   | 137160 |
| GABA type A receptor β1 subunit deficiency                                    | Early infantile epileptic encephalopathy type 45                                              | AD     | <i>GABRB1</i>   | 137190 |
| GABA type A receptor β2 subunit deficiency                                    | Infantile or early childhood epileptic encephalopathy type 2                                  | AD     | <i>GABRB2</i>   | 600232 |
| GABA type A receptor β3 subunit deficiency                                    | Early infantile epileptic encephalopathy type 43                                              | AD     | <i>GABRB3</i>   | 137192 |



|                                                                             |                                                                                                                               |        |                 |        |
|-----------------------------------------------------------------------------|-------------------------------------------------------------------------------------------------------------------------------|--------|-----------------|--------|
| GABA type A receptor $\gamma$ 2 subunit deficiency                          |                                                                                                                               | AD     | <i>GABRG2</i>   | 137164 |
| GABA type B receptor subunit 2 deficiency                                   |                                                                                                                               | AD     | <i>GABBR2</i>   | 607340 |
| See also: Methylmalonate semialdehyde dehydrogenase deficiency in group 14. |                                                                                                                               |        |                 |        |
| <b>18. Disorders of histidine metabolism</b>                                |                                                                                                                               |        |                 |        |
| Histidine ammonia-lyase deficiency                                          | Histidase deficiency; histidinemia                                                                                            | AR     | <i>HAL</i>      | 609457 |
| <b>19. Disorders of tryptophan metabolism</b>                               |                                                                                                                               |        |                 |        |
| Kynureninase deficiency                                                     | Xanthurenic aciduria; vertebral, cardiac, renal, and limb defects syndrome type 2                                             | AR     | <i>KYNU</i>     | 605197 |
| 3-hydroxyanthranilic acid 3,4-dioxygenase deficiency                        | Vertebral, cardiac, renal, and limb defects syndrome type 1                                                                   | AR     | <i>HAAO</i>     | 604521 |
| Tryptophan 2,3-dioxygenase deficiency                                       | Hypertryptophanemia                                                                                                           | AR     | <i>TDO2</i>     | 191070 |
| See also: Hartnup disorder in group 8.                                      |                                                                                                                               |        |                 |        |
| <b>20. Disorders of glutamate metabolism</b>                                |                                                                                                                               |        |                 |        |
| Glutamate dehydrogenase superactivity                                       | Hyperinsulinism-hyperammonemia syndrome; familial hyperinsulinemic hypoglycemia type 6                                        | AD     | <i>GLUD1</i>    | 138130 |
| Mitochondrial glutamate transporter deficiency                              | Early infantile epileptic encephalopathy type 3                                                                               | AR     | <i>SLC25A22</i> | 609302 |
| Glutamate aspartate transporter deficiency                                  | EAAT1 deficiency; episodic ataxia type 6                                                                                      | AD     | <i>SLC1A3</i>   | 600111 |
| Astroglial glutamate aspartate transporter deficiency                       | EAAT2 deficiency; early infantile epileptic encephalopathy type 41                                                            | AD     | <i>SLC1A2</i>   | 600300 |
| Ionotropic glutamate receptor NMDA type subunit 1 dysregulation             | Autosomal dominant mental retardation type 8; neurodevelopmental disorder with or without hyperkinetic movements and seizures | AD, AR | <i>GRIN1</i>    | 138249 |
| Ionotropic glutamate receptor NMDA type subunit 2A dysregulation            |                                                                                                                               | AD     | <i>GRIN2A</i>   | 138253 |
| Ionotropic glutamate receptor NMDA type subunit 2B dysregulation            | Early infantile epileptic encephalopathy type 27; autosomal dominant mental retardation type 6                                | AD     | <i>GRIN2B</i>   | 138252 |
| Ionotropic glutamate receptor NMDA type subunit 2D superactivity            | Early infantile epileptic encephalopathy type 46                                                                              | AD     | <i>GRIN2D</i>   | 602717 |
| Ionotropic glutamate receptor AMPA type subunit 3 deficiency                | Syndromic X-linked mental retardation, Wu type                                                                                | XLR    | <i>GRIA3</i>    | 305915 |

|                                                                                                                              |                                                                                      |        |                 |        |
|------------------------------------------------------------------------------------------------------------------------------|--------------------------------------------------------------------------------------|--------|-----------------|--------|
| Ionotropic glutamate receptor AMPA type subunit 4 dysregulation                                                              | Neurodevelopmental disorder with or without seizures and gait abnormalities (NEDSGA) | AD     | <i>GRIA4</i>    | 138246 |
| Metabotropic glutamate receptor 1 deficiency                                                                                 | Autosomal recessive spinocerebellar ataxia type 13                                   | AR     | <i>GRM1</i>     | 604473 |
| Metabotropic glutamate receptor 1 superactivity                                                                              | Spinocerebellar ataxia type 44                                                       | AD     | <i>GRM1</i>     | 604473 |
| Metabotropic glutamate receptor 6 deficiency                                                                                 | Congenital stationary night blindness type 1B                                        | AR     | <i>GRM6</i>     | 604096 |
| <b>21. Disorder of glutamine metabolism</b>                                                                                  |                                                                                      |        |                 |        |
| Glutamine synthetase deficiency                                                                                              |                                                                                      | AR     | <i>GLUL</i>     | 138290 |
| <b>22. Disorder of asparagine metabolism</b>                                                                                 |                                                                                      |        |                 |        |
| Asparagine synthetase deficiency                                                                                             |                                                                                      | AR     | <i>ASNS</i>     | 108370 |
| <b>23. Disorders of serine metabolism</b>                                                                                    |                                                                                      |        |                 |        |
| 3-phosphoglycerate dehydrogenase deficiency                                                                                  |                                                                                      | AR     | <i>PHGDH</i>    | 606879 |
| Phosphoserine aminotransferase deficiency                                                                                    |                                                                                      | AR     | <i>PSAT1</i>    | 610936 |
| Phosphoserine phosphatase deficiency                                                                                         |                                                                                      | AR     | <i>PSPH</i>     | 172480 |
| ASCT1 transporter deficiency                                                                                                 | Spastic tetraplegia, thin corpus callosum, and progressive microcephaly              | AR     | <i>SLC1A4</i>   | 600229 |
| <b>24. Disorders of glycine metabolism</b>                                                                                   |                                                                                      |        |                 |        |
| Glycine encephalopathy due to glycine decarboxylase deficiency                                                               | Nonketotic hyperglycinemia                                                           | AR     | <i>GLDC</i>     | 238300 |
| Glycine encephalopathy due to aminomethyltransferase deficiency                                                              | Nonketotic hyperglycinemia                                                           | AR     | <i>AMT</i>      | 238310 |
| Glycine transporter 1 deficiency                                                                                             | Glycine encephalopathy with normal serum glycine                                     | AR     | <i>SLC6A9</i>   | 601019 |
| Glycine transporter 2 deficiency                                                                                             | Hereditary hyperekplexia type 3                                                      | AD, AR | <i>SLC6A5</i>   | 604159 |
| Glycine receptor $\alpha$ 1 subunit deficiency                                                                               | Hereditary hyperekplexia type 1                                                      | AD, AR | <i>GLRA1</i>    | 138491 |
| Glycine receptor $\beta$ subunit deficiency                                                                                  | Hereditary hyperekplexia type 2                                                      | AR     | <i>GLRB</i>     | 138492 |
| Mitochondrial glycine transporter deficiency                                                                                 | Congenital sideroblastic anemia type 2                                               | AR     | <i>SLC25A38</i> | 610819 |
| See also: Lipoyltransferase 2, lipoic acid synthase, NFU1, BOLA3, glutaredoxin 5, IBA57, and ISCA2 deficiencies in group 25. |                                                                                      |        |                 |        |

**B. DISORDERS OF VITAMINS, COFACTORS, METALS AND MINERALS**

| <b>25. Disorders of lipoic acid and iron-sulfur metabolism</b> |                                                                                           |        |               |        |
|----------------------------------------------------------------|-------------------------------------------------------------------------------------------|--------|---------------|--------|
| Lipoyltransferase 2 deficiency                                 | Neonatal severe encephalopathy with lactic acidosis and brain abnormalities (NELABA)      | AR     | <i>LIPT2</i>  | 617659 |
| Lipoic acid synthase deficiency                                | Hyperglycinemia, lactic acidosis, and seizures                                            | AR     | <i>LIAS</i>   | 607031 |
| Lipoyltransferase 1 deficiency                                 |                                                                                           | AR     | <i>LIPT1</i>  | 610284 |
| NFU1 deficiency                                                | Multiple mitochondrial dysfunctions syndrome type 1                                       | AR     | <i>NFU1</i>   | 608100 |
| BOLA3 deficiency                                               | Multiple mitochondrial dysfunctions syndrome type 2 with hyperglycinemia                  | AR     | <i>BOLA3</i>  | 613183 |
| Glutaredoxin 5 deficiency                                      |                                                                                           | AR     | <i>GLRX5</i>  | 609588 |
| IBA57 deficiency                                               |                                                                                           | AR     | <i>IBA57</i>  | 615316 |
| ISCA1 deficiency                                               | Multiple mitochondrial dysfunctions syndrome type 5                                       | AR     | <i>ISCA1</i>  | 611006 |
| ISCA2 deficiency                                               | Multiple mitochondrial dysfunctions syndrome type 4                                       | AR     | <i>ISCA2</i>  | 615317 |
| ISCU deficiency                                                | Hereditary myopathy with lactic acidosis, Swedish type myopathy with exercise intolerance | AD, AR | <i>ISCU</i>   | 611911 |
| ABCB7 deficiency                                               | Sideroblastic anemia and spinocerebellar ataxia                                           | XLR    | <i>ABCB7</i>  | 300135 |
| Ferredoxin reductase deficiency                                | Auditory neuropathy and optic atrophy                                                     | AR     | <i>FDXR</i>   | 103270 |
| Frataxin deficiency                                            | Friedreich ataxia                                                                         | AR     | <i>FXN</i>    | 606829 |
| See also: HSPA9 deficiency in group 79.                        |                                                                                           |        |               |        |
| <b>26. Disorders of cobalamin metabolism</b>                   |                                                                                           |        |               |        |
| Hereditary intrinsic factor deficiency                         |                                                                                           | AR     | <i>GIF</i>    | 609342 |
| Cubilin deficiency                                             | Imerslund-Gräsbeck disease, Finnish type                                                  | AR     | <i>CUBN</i>   | 602997 |
| Amnionless deficiency                                          | Imerslund-Gräsbeck disease, Norwegian type                                                | AR     | <i>AMN</i>    | 605799 |
| Haptocorrin deficiency                                         | Transcobalamin I deficiency                                                               | AD, AR | <i>TCN1</i>   | 189905 |
| Transcobalamin II deficiency                                   |                                                                                           | AR     | <i>TCN2</i>   | 613441 |
| Transcobalamin receptor deficiency                             |                                                                                           | AR     | <i>CD320</i>  | 606475 |
| Methylmalonic aciduria and homocystinuria, cblF type           |                                                                                           | AR     | <i>LMBRD1</i> | 612625 |
| Methylmalonic aciduria and homocystinuria, cblJ type           |                                                                                           | AR     | <i>ABCD4</i>  | 603214 |

|                                                      |                                                                                                            |     |                       |                 |
|------------------------------------------------------|------------------------------------------------------------------------------------------------------------|-----|-----------------------|-----------------|
| Methylmalonic aciduria and homocystinuria, cblC type |                                                                                                            | AR  | <i>MMACHC</i>         | 609831          |
| Epi-cblC                                             |                                                                                                            | AR  | <i>MMACHC + PRDX1</i> | 609831 + 176763 |
| cblD disease                                         |                                                                                                            | AR  | <i>MMADHC</i>         | 611935          |
| Methionine synthase reductase deficiency             | Homocystinuria-megaloblastic anemia, cblE type                                                             | AR  | <i>MTRR</i>           | 602568          |
| Methionine synthase deficiency                       | Homocystinuria-megaloblastic anemia, cblG type                                                             | AR  | <i>MTR</i>            | 156570          |
| Methylmalonic aciduria, cblA type                    |                                                                                                            | AR  | <i>MMAA</i>           | 607481          |
| Methylmalonic aciduria, cblB type                    |                                                                                                            | AR  | <i>MMAB</i>           | 607568          |
| Methylmalonic aciduria and homocystinuria, cblX type |                                                                                                            | XLR | <i>HCFC1</i>          | 300019          |
| <b>27. Disorders of folate metabolism</b>            |                                                                                                            |     |                       |                 |
| Proton-coupled folate transporter deficiency         | Hereditary folate malabsorption                                                                            | AR  | <i>SLC46A1</i>        | 611672          |
| Folate receptor $\alpha$ deficiency                  | Neurodegeneration due to cerebral folate transport deficiency                                              | AR  | <i>FOLR1</i>          | 136430          |
| 5,10-methylenetetrahydrofolate reductase deficiency  |                                                                                                            | AR  | <i>MTHFR</i>          | 607093          |
| Methylenetetrahydrofolate dehydrogenase 1 deficiency | Combined immunodeficiency and megaloblastic anemia with or without hyperhomocysteinemia (CIMAH)            | AR  | <i>MTHFD1</i>         | 172460          |
| Dihydrofolate reductase deficiency                   |                                                                                                            | AR  | <i>DHFR</i>           | 126060          |
| Glutamate formiminotransferase deficiency            | Formiminoglutamic aciduria                                                                                 | AR  | <i>FTCD</i>           | 606806          |
| <b>28. Disorders of biotin metabolism</b>            |                                                                                                            |     |                       |                 |
| Biotinidase deficiency                               |                                                                                                            | AR  | <i>BTD</i>            | 609019          |
| Holocarboxylase synthetase deficiency                |                                                                                                            | AR  | <i>HLCS</i>           | 609018          |
| <b>29. Disorders of thiamine metabolism</b>          |                                                                                                            |     |                       |                 |
| Thiamine transporter 1 deficiency                    | Thiamine-responsive megaloblastic anemia; Rogers syndrome; thiamine metabolism dysfunction syndrome type 1 | AR  | <i>SLC19A2</i>        | 603941          |
| Thiamine transporter 2 deficiency                    | Biotin-thiamine-responsive basal ganglia disease; thiamine metabolism dysfunction syndrome type 2          | AR  | <i>SLC19A3</i>        | 606152          |
| Thiamine pyrophosphokinase deficiency                | Thiamine metabolism dysfunction syndrome type 5                                                            | AR  | <i>TPK1</i>           | 606370          |

|                                                                                                                                 |                                                                                                                                                                                                           |    |                 |        |
|---------------------------------------------------------------------------------------------------------------------------------|-----------------------------------------------------------------------------------------------------------------------------------------------------------------------------------------------------------|----|-----------------|--------|
| Mitochondrial thiamine pyrophosphate transporter deficiency                                                                     | Amish lethal microcephaly, thiamine metabolism dysfunction syndrome type 3 (severe); bilateral striatal necrosis and progressive polyneuropathy, thiamine metabolism dysfunction syndrome type 4 (milder) | AR | <i>SLC25A19</i> | 606521 |
| <b>30. Disorders of riboflavin metabolism</b>                                                                                   |                                                                                                                                                                                                           |    |                 |        |
| Riboflavin transporter 1 deficiency                                                                                             | Transient riboflavin deficiency                                                                                                                                                                           | AD | <i>SLC52A1</i>  | 607883 |
| Riboflavin transporter 2 deficiency                                                                                             | Brown-Vialetto-van Laere syndrome type 1                                                                                                                                                                  | AR | <i>SLC52A3</i>  | 613350 |
| Riboflavin transporter 3 deficiency                                                                                             | Brown-Vialetto-van Laere syndrome type 2                                                                                                                                                                  | AR | <i>SLC52A2</i>  | 607882 |
| Flavin adenine dinucleotide synthetase deficiency                                                                               |                                                                                                                                                                                                           | AR | <i>FLAD1</i>    | 610595 |
| Mitochondrial flavin adenine dinucleotide transporter deficiency                                                                | Riboflavin-responsive exercise intolerance                                                                                                                                                                | AR | <i>SLC25A32</i> | 610815 |
| Electron transfer flavoprotein $\alpha$ subunit deficiency                                                                      | Glutaric acidemia type 2A; multiple acyl-CoA dehydrogenase deficiency type 2A                                                                                                                             | AR | <i>ETFA</i>     | 608053 |
| Electron transfer flavoprotein $\beta$ subunit deficiency                                                                       | Glutaric acidemia type 2B; multiple acyl-CoA dehydrogenase deficiency type 2B                                                                                                                             | AR | <i>ETFB</i>     | 130410 |
| Electron transfer flavoprotein dehydrogenase deficiency                                                                         | Glutaric acidemia type 2C; multiple acyl-CoA dehydrogenase deficiency type 2C                                                                                                                             | AR | <i>ETFDH</i>    | 231675 |
| <b>31. Disorders of niacin and NAD metabolism</b>                                                                               |                                                                                                                                                                                                           |    |                 |        |
| Nicotinamide mononucleotide adenylyl transferase 1 deficiency                                                                   | Leber congenital amaurosis 9                                                                                                                                                                              | AR | <i>NMNAT1</i>   | 608700 |
| Mitochondrial NAD kinase 2 deficiency                                                                                           | 2,4-dienoyl-CoA reductase deficiency with hyperlysinemia                                                                                                                                                  | AR | <i>NADK2</i>    | 615787 |
| NAD(P)HX epimerase deficiency                                                                                                   | Apolipoprotein A-I binding protein deficiency                                                                                                                                                             | AR | <i>NAXE</i>     | 608862 |
| NAD(P)HX dehydratase deficiency                                                                                                 | CARKD deficiency                                                                                                                                                                                          | AR | <i>NAXD</i>     | 615910 |
| Nicotinamide nucleotide transhydrogenase deficiency                                                                             | Glucocorticoid deficiency type 4                                                                                                                                                                          | AR | <i>NNT</i>      | 607878 |
| See also: Hartnup disorder in group 8, and kynureninase and 3-hydroxyanthranilic acid 3,4-dioxygenase deficiencies in group 19. |                                                                                                                                                                                                           |    |                 |        |
| <b>32. Disorders of pantothenate metabolism</b>                                                                                 |                                                                                                                                                                                                           |    |                 |        |
| Pantothenate kinase 2 deficiency                                                                                                | Pantothenate kinase-associated neurodegeneration (PKAN); neurodegeneration with brain iron accumulation type 1                                                                                            | AR | <i>PANK2</i>    | 606157 |

|                                                                                                                                                       |                                                                                                                                         |        |                |        |
|-------------------------------------------------------------------------------------------------------------------------------------------------------|-----------------------------------------------------------------------------------------------------------------------------------------|--------|----------------|--------|
| Coenzyme A synthase deficiency                                                                                                                        | Coenzyme A synthase protein-associated neurodegeneration (CoPAN); neurodegeneration with brain iron accumulation type 6                 | AR     | <i>COASY</i>   | 609855 |
| <b>33. Disorders of pyridoxine metabolism</b>                                                                                                         |                                                                                                                                         |        |                |        |
| Pyridoxamine 5'-phosphate oxidase deficiency                                                                                                          |                                                                                                                                         | AR     | <i>PNPO</i>    | 603287 |
| Pyridoxal 5'-phosphate binding protein deficiency                                                                                                     | PROSC deficiency                                                                                                                        | AR     | <i>PLPBP</i>   | 604436 |
| Tissue-nonspecific alkaline phosphatase deficiency                                                                                                    | Hypophosphatasia                                                                                                                        | AD, AR | <i>ALPL</i>    | 171760 |
| See also: $\alpha$ -amino adipic semialdehyde dehydrogenase deficiency in group 15, and pyrroline-5-carboxylate dehydrogenase deficiency in group 16. |                                                                                                                                         |        |                |        |
| <b>34. Disorder of vitamin C metabolism</b>                                                                                                           |                                                                                                                                         |        |                |        |
| L-dehydroascorbate transporter deficiency                                                                                                             | GLUT10 deficiency; arterial tortuosity syndrome                                                                                         | AR     | <i>SLC2A10</i> | 606145 |
| <b>35. Disorders of vitamin A metabolism</b>                                                                                                          |                                                                                                                                         |        |                |        |
| $\beta$ -carotene 15,15'-dioxygenase deficiency                                                                                                       | Hypercarotenemia and vitamin A deficiency                                                                                               | AD     | <i>BCO1</i>    | 605748 |
| Plasma retinol-binding protein deficiency                                                                                                             | Retinal dystrophy, iris coloboma, and comedogenic acne syndrome (recessive); isolated microphthalmia and/or coloboma type 10 (dominant) | AD, AR | <i>RBP4</i>    | 180250 |
| Vitamin A receptor deficiency                                                                                                                         | Matthew-Wood syndrome; pulmonary hypoplasia-diaphragmatic hernia-anophthalmia-cardiac defect (PDAC) syndrome                            | AR     | <i>STRA6</i>   | 610745 |
| Lecithin retinol acyltransferase deficiency                                                                                                           | Leber congenital amaurosis type 14                                                                                                      | AR     | <i>LRAT</i>    | 604863 |
| Retinal isomerase deficiency                                                                                                                          | Leber congenital amaurosis type 2                                                                                                       | AR     | <i>RPE65</i>   | 180069 |
| Retinol dehydrogenase 5 deficiency                                                                                                                    | Fundus albipunctatus                                                                                                                    | AD, AR | <i>RDH5</i>    | 601617 |
| Retinol dehydrogenase 12 deficiency                                                                                                                   | Leber congenital amaurosis type 13                                                                                                      | AR     | <i>RDH12</i>   | 608830 |
| Interphotoreceptor retinol-binding protein deficiency                                                                                                 | Retinitis pigmentosa type 66                                                                                                            | AR     | <i>RBP3</i>    | 180290 |
| Retinaldehyde dehydrogenase 3 deficiency                                                                                                              | Isolated microphthalmia type 8                                                                                                          | AR     | <i>ALDH1A3</i> | 600463 |
| Cellular retinaldehyde-binding protein deficiency                                                                                                     |                                                                                                                                         | AD, AR | <i>RLBP1</i>   | 180090 |
| <b>36. Disorders of vitamin D metabolism</b>                                                                                                          |                                                                                                                                         |        |                |        |
| 1- $\alpha$ -hydroxylase deficiency                                                                                                                   | Vitamin D-dependent rickets type 1A                                                                                                     | AR     | <i>CYP27B1</i> | 609506 |
| Vitamin D 25-hydroxylase deficiency                                                                                                                   | Vitamin D-dependent rickets type 1B                                                                                                     | AR     | <i>CYP2R1</i>  | 608713 |

|                                                        |                                                                                    |        |                |        |
|--------------------------------------------------------|------------------------------------------------------------------------------------|--------|----------------|--------|
| Vitamin D receptor deficiency                          | Vitamin D-dependent rickets type 2A                                                | AR     | <i>VDR</i>     | 601769 |
| Vitamin D 24-hydroxylase deficiency                    | Infantile hypercalcemia type 1                                                     | AR     | <i>CYP24A1</i> | 126065 |
| <b>37. Disorder of vitamin E metabolism</b>            |                                                                                    |        |                |        |
| $\alpha$ -tocopherol transfer protein deficiency       | Ataxia with isolated vitamin E deficiency                                          | AR     | <i>TTPA</i>    | 600415 |
| <b>38. Disorders of vitamin K metabolism</b>           |                                                                                    |        |                |        |
| $\gamma$ -glutamyl carboxylase deficiency              | Combined deficiency of vitamin K-dependent coagulation factors type 1              | AR     | <i>GGCX</i>    | 137167 |
| Vitamin K epoxide reductase deficiency                 | Combined deficiency of vitamin K-dependent coagulation factors type 2              | AR     | <i>VKORC1</i>  | 608547 |
| Microsomal epoxide hydrolase deficiency                | Familial hypercholanemia                                                           | AR     | <i>EPHX1</i>   | 132810 |
| Menaquinone-4 synthetase deficiency                    | Schnyder corneal dystrophy                                                         | AD     | <i>UBIAD1</i>  | 611632 |
| <b>39. Disorders of molybdenum metabolism</b>          |                                                                                    |        |                |        |
| Cyclic pyranopterin monophosphate synthase deficiency  | Molybdenum cofactor deficiency type A                                              | AR     | <i>MOCS1</i>   | 603707 |
| Molybdopterin synthase deficiency                      | Molybdenum cofactor deficiency type B                                              | AR     | <i>MOCS2</i>   | 603708 |
| Gephyrin deficiency                                    | Molybdenum cofactor deficiency type C                                              | AR     | <i>GPHN</i>    | 603930 |
| Molybdenum cofactor sulfurase deficiency               | Xanthinuria type 2                                                                 | AR     | <i>MOCOS</i>   | 613274 |
| <b>40. Disorders of copper metabolism</b>              |                                                                                    |        |                |        |
| Copper-transporting ATPase $\beta$ subunit deficiency  | Wilson disease; hepatolenticular degeneration                                      | AR     | <i>ATP7B</i>   | 606882 |
| Copper-transporting ATPase $\alpha$ subunit deficiency | Menkes disease (severe); occipital horn syndrome (milder)                          | XLR    | <i>ATP7A</i>   | 300011 |
| ATP7A-related distal motor neuropathy                  | X-linked distal spinal muscular atrophy type 3                                     | XLR    | <i>ATP7A</i>   | 300011 |
| MEDNIK syndrome                                        |                                                                                    | AR     | <i>AP1S1</i>   | 603531 |
| Acetyl-CoA transporter deficiency                      | Huppke-Brendel syndrome; congenital cataracts, hearing loss, and neurodegeneration | AR     | <i>SLC33A1</i> | 603690 |
| <b>41. Disorders of iron metabolism</b>                |                                                                                    |        |                |        |
| Hereditary hemochromatosis type 1                      |                                                                                    | AR     | <i>HFE</i>     | 613609 |
| Hemojuvelin deficiency                                 | Hereditary hemochromatosis type 2A                                                 | AR     | <i>HFE2</i>    | 608374 |
| Hepcidin deficiency                                    | Hereditary hemochromatosis type 2B                                                 | AR     | <i>HAMP</i>    | 606464 |
| Transferrin receptor 2 deficiency                      | Hereditary hemochromatosis type 3                                                  | AR     | <i>TFR2</i>    | 604720 |
| Ferroportin deficiency                                 | Hereditary hemochromatosis type 4                                                  | AD     | <i>SLC40A1</i> | 604653 |
| Ferritin light chain deficiency                        | Hereditary L-ferritin deficiency                                                   | AD, AR | <i>FTL</i>     | 134790 |

|                                                                |                                                                                                                          |    |                 |        |
|----------------------------------------------------------------|--------------------------------------------------------------------------------------------------------------------------|----|-----------------|--------|
| Ferritin light chain superactivity                             | Neuroferritinopathy; neurodegeneration with brain iron accumulation 3                                                    | AR | <i>FTL</i>      | 134790 |
| Ferritin light chain dysregulation                             | Hyperferritinemia-cataract syndrome                                                                                      | AR | <i>FTL</i>      | 134790 |
| Hereditary ceruloplasmin deficiency                            | Aceruloplasminemia                                                                                                       | AR | <i>CP</i>       | 117700 |
| Matriptase 2 deficiency                                        | Iron-refractory iron deficiency anemia                                                                                   | AR | <i>TMPRSS6</i>  | 609862 |
| Hereditary transferrin deficiency                              | Atransferrinemia                                                                                                         | AR | <i>TF</i>       | 190000 |
| Transferrin receptor deficiency                                | Immunodeficiency type 46                                                                                                 | AR | <i>TFRC</i>     | 190010 |
| Divalent metal transporter 1 deficiency                        | Hypochromic microcytic anemia with iron overload type 1                                                                  | AR | <i>SLC11A2</i>  | 600523 |
| <b>42. Disorders of manganese metabolism</b>                   |                                                                                                                          |    |                 |        |
| Hypermanganesemia with dystonia type 1                         |                                                                                                                          | AR | <i>SLC30A10</i> | 611146 |
| Hypermanganesemia with dystonia type 2                         |                                                                                                                          | AR | <i>SLC39A14</i> | 608736 |
| SLC39A8 deficiency                                             |                                                                                                                          | AR | <i>SLC39A8</i>  | 608732 |
| See also: ATP13A2 deficiency in group 101.                     |                                                                                                                          |    |                 |        |
| <b>43. Disorders of zinc metabolism</b>                        |                                                                                                                          |    |                 |        |
| Acrodermatitis enteropathica                                   |                                                                                                                          | AR | <i>SLC39A4</i>  | 607059 |
| Transient neonatal zinc deficiency                             |                                                                                                                          | AD | <i>SLC30A2</i>  | 609617 |
| Spondylocheirodysplastic Ehlers-Danlos syndrome                |                                                                                                                          | AR | <i>SLC39A13</i> | 608735 |
| Birk-Landau-Perez syndrome                                     |                                                                                                                          | AR | <i>SLC30A9</i>  | 604604 |
| <b>44. Disorders of selenium metabolism</b>                    |                                                                                                                          |    |                 |        |
| Selenocysteine insertion sequence-binding protein 2 deficiency |                                                                                                                          | AR | <i>SECISBP2</i> | 607693 |
| O-phosphoseryl-tRNA(Sec) selenium transferase deficiency       | SelenocysteinyI-tRNA(Sec) synthase deficiency; progressive cerebellocerebral atrophy; pontocerebellar hypoplasia type 2D | AR | <i>SEPSECS</i>  | 613009 |
| <b>45. Disorders of magnesium metabolism</b>                   |                                                                                                                          |    |                 |        |
| Epithelial magnesium transporter deficiency                    | Hypomagnesemia with secondary hypocalcemia                                                                               | AR | <i>TRPM6</i>    | 607009 |
| Sodium-potassium ATPase $\gamma$ subunit deficiency            | Autosomal dominant hypomagnesemia with hypocalciuria; renal hypomagnesemia type 2                                        | AD | <i>FXYD2</i>    | 601814 |
| Claudin 10 deficiency                                          | Hypohydrosis, electrolyte imbalance, lacrimal gland dysfunction, ichthyosis and xerostomia (HELIX) syndrome              | AR | <i>CLDN10</i>   | 617579 |



|                                                                                                                                                                                                                                                             |                                                                                                                                                                              |        |                |        |
|-------------------------------------------------------------------------------------------------------------------------------------------------------------------------------------------------------------------------------------------------------------|------------------------------------------------------------------------------------------------------------------------------------------------------------------------------|--------|----------------|--------|
| Claudin 16 deficiency                                                                                                                                                                                                                                       | Familial hypomagnesemia with hypercalciuria and nephrocalcinosis type 1; renal hypomagnesemia type 3                                                                         | AR     | <i>CLDN16</i>  | 603959 |
| Claudin 19 deficiency                                                                                                                                                                                                                                       | Familial hypomagnesemia with hypercalciuria and nephrocalcinosis type 2; renal hypomagnesemia type 5 with ocular involvement                                                 | AR     | <i>CLDN19</i>  | 610036 |
| Cyclin M2 deficiency                                                                                                                                                                                                                                        | Renal hypomagnesemia type 6                                                                                                                                                  | AD, AR | <i>CNNM2</i>   | 607803 |
| Sodium-chloride cotransporter deficiency                                                                                                                                                                                                                    | Gitelman syndrome                                                                                                                                                            | AR     | <i>SLC12A3</i> | 600968 |
| KCNJ10 deficiency                                                                                                                                                                                                                                           | Epilepsy, ataxia, sensorineural deafness, tubulopathy (EAST) syndrome; seizures, sensorineural deafness, ataxia, mental retardation, electrolyte imbalance (SeSAME) syndrome | AR     | <i>KCNJ10</i>  | 612780 |
| See also: Pterin-4- $\alpha$ -carbinolamine dehydratase deficiency in group 11, hepatocyte nuclear factor-1 $\beta$ deficiency in group 50, mitochondrial tRNA(Ile) deficiency in group 73, and mitochondrial seryl-tRNA synthetase deficiency in group 74. |                                                                                                                                                                              |        |                |        |
| <b>C. DISORDERS OF CARBOHYDRATES</b>                                                                                                                                                                                                                        |                                                                                                                                                                              |        |                |        |
| <b>46. Disorders of carbohydrate transport and absorption</b>                                                                                                                                                                                               |                                                                                                                                                                              |        |                |        |
| Blood-brain barrier glucose transporter 1 deficiency                                                                                                                                                                                                        | GLUT1 deficiency                                                                                                                                                             | AD, AR | <i>SLC2A1</i>  | 138140 |
| Neuronal glucose transporter deficiency                                                                                                                                                                                                                     | Intellectual developmental disorder with neuropsychiatric features                                                                                                           | AR     | <i>SLC45A1</i> | 605763 |
| Glucose transporter 2 deficiency                                                                                                                                                                                                                            | Fanconi-Bickel syndrome                                                                                                                                                      | AR     | <i>SLC2A2</i>  | 138160 |
| Intestinal sodium-glucose cotransporter 1 deficiency                                                                                                                                                                                                        | Glucose-galactose malabsorption                                                                                                                                              | AR     | <i>SLC5A1</i>  | 182380 |
| Congenital sucrase-isomaltase deficiency                                                                                                                                                                                                                    |                                                                                                                                                                              | AR     | <i>SI</i>      | 609845 |
| Trehalase deficiency                                                                                                                                                                                                                                        |                                                                                                                                                                              |        | <i>TREH</i>    | 275360 |
| Congenital lactase deficiency                                                                                                                                                                                                                               | Congenital alactasia                                                                                                                                                         | AR     | <i>LCT</i>     | 603202 |
| Renal sodium-glucose cotransporter 2 deficiency                                                                                                                                                                                                             | Familial renal glucosuria type 1                                                                                                                                             | AD, AR | <i>SLC5A2</i>  | 182381 |
| <b>47. Disorders of galactose metabolism</b>                                                                                                                                                                                                                |                                                                                                                                                                              |        |                |        |
| Galactose-1-phosphate uridylyltransferase deficiency                                                                                                                                                                                                        | Classic galactosemia; galactosemia type 1                                                                                                                                    | AR     | <i>GALT</i>    | 606999 |
| Galactose epimerase deficiency                                                                                                                                                                                                                              | Galactosemia type 3                                                                                                                                                          | AR     | <i>GALE</i>    | 606953 |
| Galactokinase deficiency                                                                                                                                                                                                                                    | Galactosemia type 2                                                                                                                                                          | AR     | <i>GALK1</i>   | 604313 |
| <b>48. Disorders of fructose metabolism</b>                                                                                                                                                                                                                 |                                                                                                                                                                              |        |                |        |
| Hepatic fructokinase deficiency                                                                                                                                                                                                                             | Essential fructosuria                                                                                                                                                        | AR     | <i>KHK</i>     | 614058 |

|                                                                             |                                                                                                                                                                                                  |        |               |        |
|-----------------------------------------------------------------------------|--------------------------------------------------------------------------------------------------------------------------------------------------------------------------------------------------|--------|---------------|--------|
| Aldolase B deficiency                                                       | Hereditary fructose intolerance                                                                                                                                                                  | AR     | <i>ALDOB</i>  | 612724 |
| See also: Fructose-1,6-bisphosphatase deficiency in group 52.               |                                                                                                                                                                                                  |        |               |        |
| <b>49. Disorders of the pentose phosphate pathway and polyol metabolism</b> |                                                                                                                                                                                                  |        |               |        |
| Glucose-6-phosphate dehydrogenase deficiency                                |                                                                                                                                                                                                  | XLR    | <i>G6PD</i>   | 305900 |
| Ribose 5-phosphate isomerase deficiency                                     |                                                                                                                                                                                                  | AR     | <i>RPIA</i>   | 180430 |
| Transaldolase deficiency                                                    |                                                                                                                                                                                                  | AR     | <i>TALDO1</i> | 602063 |
| Transketolase deficiency                                                    | Short stature, developmental delay, and congenital heart defects                                                                                                                                 | AR     | <i>TKT</i>    | 606781 |
| Sedoheptulose kinase deficiency                                             |                                                                                                                                                                                                  | AR     | <i>SHPK</i>   | 605060 |
| L-xylulose reductase deficiency                                             | Pentosuria; xylitol dehydrogenase deficiency                                                                                                                                                     | AR     | <i>DCXR</i>   | 608347 |
| <b>50. Disorders of insulin secretion and signaling</b>                     |                                                                                                                                                                                                  |        |               |        |
| ATP-sensitive potassium channel regulatory subunit deficiency               | Familial hyperinsulinemic hypoglycemia type 1                                                                                                                                                    | AD, AR | <i>ABCC8</i>  | 600509 |
| ATP-sensitive potassium channel regulatory subunit superactivity            | Developmental delay, epilepsy and neonatal diabetes (DEND), permanent or transient neonatal diabetes without neurologic features (severe); maturity-onset diabetes of the young type 12 (milder) | AD, AR | <i>ABCC8</i>  | 600509 |
| ATP-sensitive potassium channel pore-forming subunit deficiency             | Familial hyperinsulinemic hypoglycemia type 2                                                                                                                                                    | AR     | <i>KCNJ11</i> | 600937 |
| ATP-sensitive potassium channel pore-forming subunit superactivity          | Developmental delay, epilepsy and neonatal diabetes (DEND), permanent or transient neonatal diabetes without neurologic features (severe); maturity-onset diabetes of the young type 13 (milder) | AD, AR | <i>KCNJ11</i> | 600937 |
| Hepatocyte nuclear factor-4 $\alpha$ deficiency                             |                                                                                                                                                                                                  | AD     | <i>HNF4A</i>  | 600281 |
| Hepatocyte nuclear factor-1 $\alpha$ deficiency                             |                                                                                                                                                                                                  | AD     | <i>HNF1A</i>  | 142410 |
| Hepatocyte nuclear factor-1 $\beta$ deficiency                              |                                                                                                                                                                                                  | AD     | <i>HNF1B</i>  | 189907 |
| Uncoupling protein 2 deficiency                                             |                                                                                                                                                                                                  | AD     | <i>UCP2</i>   | 601693 |
| Insulin deficiency                                                          | Permanent neonatal diabetes mellitus (severe); maturity-onset diabetes of the young type 10 (milder)                                                                                             | AD     | <i>INS</i>    | 176730 |
| Proinsulin cleavage deficiency                                              | Hyperproinsulinemia                                                                                                                                                                              | AD     | <i>INS</i>    | 176730 |
| Insulin receptor dysregulation                                              | Familial hyperinsulinemic hypoglycemia type 5                                                                                                                                                    | AD     | <i>INSR</i>   | 147670 |

|                                                                                                                                                                                                                                                                                                                                                                                                                                                                                                                      |                                                                                                                          |        |                |        |
|----------------------------------------------------------------------------------------------------------------------------------------------------------------------------------------------------------------------------------------------------------------------------------------------------------------------------------------------------------------------------------------------------------------------------------------------------------------------------------------------------------------------|--------------------------------------------------------------------------------------------------------------------------|--------|----------------|--------|
| Insulin promoter factor 1 deficiency                                                                                                                                                                                                                                                                                                                                                                                                                                                                                 | Maturity-onset diabetes of the young type 4 (dominant); pancreatic agenesis (recessive)                                  | AD, AR | <i>PDX1</i>    | 600733 |
| Neurogenic differentiation factor 1 deficiency                                                                                                                                                                                                                                                                                                                                                                                                                                                                       | Maturity-onset diabetes of the young type 6 (dominant); permanent neonatal diabetes and neurologic anomalies (recessive) | AD, AR | <i>NEUROD1</i> | 601724 |
| Krüppel-like factor 11 deficiency                                                                                                                                                                                                                                                                                                                                                                                                                                                                                    | Maturity-onset diabetes of the young type 7                                                                              | AD     | <i>KLF11</i>   | 603301 |
| PAX4 deficiency                                                                                                                                                                                                                                                                                                                                                                                                                                                                                                      | Maturity-onset diabetes of the young type 9                                                                              | AD     | <i>PAX4</i>    | 167413 |
| BLK deficiency                                                                                                                                                                                                                                                                                                                                                                                                                                                                                                       | Maturity-onset diabetes of the young type 11                                                                             | AD     | <i>BLK</i>     | 191305 |
| APPL1 deficiency                                                                                                                                                                                                                                                                                                                                                                                                                                                                                                     | Maturity-onset diabetes of the young type 14                                                                             | AD     | <i>APPL1</i>   | 604299 |
| AKT2 superactivity                                                                                                                                                                                                                                                                                                                                                                                                                                                                                                   | Hypoinsulinemic hypoglycemia with hemihypertrophy                                                                        | AD     | <i>AKT2</i>    | 164731 |
| RFX6 deficiency                                                                                                                                                                                                                                                                                                                                                                                                                                                                                                      | Mitchell-Riley syndrome (recessive); maturity-onset diabetes of the young (dominant)                                     | AD, AR | <i>RFX6</i>    | 612659 |
| See also: Adenosine kinase deficiency in group 13, glutamate dehydrogenase superactivity in group 20, glucokinase superactivity in group 53, short-chain 3-hydroxyacyl-CoA dehydrogenase deficiency in group 83, catalytic phosphatidylinositol 3-kinase $\alpha$ subunit superactivity in group 93, phosphomannomutase 2, phosphomannose isomerase, ALG3 $\alpha$ -1,3-mannosyltransferase, and ALG6 $\alpha$ -1,3-glucosyltransferase deficiencies in group 115, and phosphoglucomutase 1 deficiency in group 125. |                                                                                                                          |        |                |        |
| <b>51. Glycogen storage diseases</b>                                                                                                                                                                                                                                                                                                                                                                                                                                                                                 |                                                                                                                          |        |                |        |
| Muscle glycogenin 1 deficiency                                                                                                                                                                                                                                                                                                                                                                                                                                                                                       | Glycogen storage disease type 15; polyglucosan body myopathy type 2                                                      | AR     | <i>GYG1</i>    | 603942 |
| Muscle glycogen synthase deficiency                                                                                                                                                                                                                                                                                                                                                                                                                                                                                  | Glycogen storage disease type 0b                                                                                         | AR     | <i>GYS1</i>    | 138570 |
| Hepatic glycogen synthase deficiency                                                                                                                                                                                                                                                                                                                                                                                                                                                                                 | Glycogen storage disease type 0a                                                                                         | AR     | <i>GYS2</i>    | 138571 |
| Glucose-6-phosphate transporter deficiency                                                                                                                                                                                                                                                                                                                                                                                                                                                                           | Glycogen storage disease type 1b                                                                                         | AR     | <i>SLC37A4</i> | 602671 |
| $\alpha$ -glucosidase deficiency                                                                                                                                                                                                                                                                                                                                                                                                                                                                                     | Glycogen storage disease type 2; Pompe disease                                                                           | AR     | <i>GAA</i>     | 606800 |
| Glycogen debranching enzyme deficiency                                                                                                                                                                                                                                                                                                                                                                                                                                                                               | Glycogen storage disease type 3; Cori-Forbes disease; limit dextrinosis                                                  | AR     | <i>AGL</i>     | 610860 |
| Glycogen branching enzyme deficiency                                                                                                                                                                                                                                                                                                                                                                                                                                                                                 | Glycogen storage disease type 4; Andersen disease; adult polyglucosan body disease                                       | AR     | <i>GBE1</i>    | 607839 |
| Muscle glycogen phosphorylase deficiency                                                                                                                                                                                                                                                                                                                                                                                                                                                                             | Glycogen storage disease type 5; McArdle disease                                                                         | AR     | <i>PYGM</i>    | 608455 |
| Liver glycogen phosphorylase deficiency                                                                                                                                                                                                                                                                                                                                                                                                                                                                              | Glycogen storage disease type 6; Hers disease                                                                            | AR     | <i>PYGL</i>    | 613741 |
| Hepatic phosphorylase kinase $\alpha$ 2 subunit deficiency                                                                                                                                                                                                                                                                                                                                                                                                                                                           | Glycogen storage disease type 9a                                                                                         | XLR    | <i>PHKA2</i>   | 300798 |

|                                                                                                                                                                                                                                                                                                         |                                                    |     |               |        |
|---------------------------------------------------------------------------------------------------------------------------------------------------------------------------------------------------------------------------------------------------------------------------------------------------------|----------------------------------------------------|-----|---------------|--------|
| Phosphorylase kinase $\beta$ subunit deficiency                                                                                                                                                                                                                                                         | Glycogen storage disease type 9b                   | AR  | <i>PHKB</i>   | 172490 |
| Hepatic phosphorylase kinase $\gamma$ 2 subunit deficiency                                                                                                                                                                                                                                              | Glycogen storage disease type 9c                   | AR  | <i>PHKG2</i>  | 172471 |
| Muscle phosphorylase kinase $\alpha$ 1 subunit deficiency                                                                                                                                                                                                                                               | Glycogen storage disease type 9d                   | AR  | <i>PHKA1</i>  | 311870 |
| HOIL1 deficiency                                                                                                                                                                                                                                                                                        | Polyglucosan body myopathy type 1; HOIL deficiency | AR  | <i>RBCK1</i>  | 610924 |
| Cardiac phosphorylase kinase deficiency                                                                                                                                                                                                                                                                 |                                                    | AD  | <i>PRKAG2</i> | 602743 |
| Lysosome-associated membrane protein 2 deficiency                                                                                                                                                                                                                                                       | Danon disease                                      | XL  | <i>LAMP2</i>  | 309060 |
| Laforin deficiency                                                                                                                                                                                                                                                                                      | Progressive myoclonic epilepsy type 2A             | AR  | <i>EPM2A</i>  | 607566 |
| Malin deficiency                                                                                                                                                                                                                                                                                        | Progressive myoclonic epilepsy type 2B             | AR  | <i>NHLRC1</i> | 608072 |
| See also: $\alpha$ -glucosidase deficiency in group 51, glucose-6-phosphatase deficiency in group 52, muscle phosphofructokinase, aldolase A, enolase $\beta$ , muscle phosphoglycerate mutase, and lactate dehydrogenase A deficiencies in group 53, and phosphoglucomutase 1 deficiency in group 125. |                                                    |     |               |        |
| <b>52. Disorders of gluconeogenesis</b>                                                                                                                                                                                                                                                                 |                                                    |     |               |        |
| Glucose-6-phosphatase deficiency                                                                                                                                                                                                                                                                        | Glycogen storage disease type 1a                   | AR  | <i>G6PC</i>   | 613742 |
| Fructose-1,6-bisphosphatase deficiency                                                                                                                                                                                                                                                                  |                                                    | AR  | <i>FBP1</i>   | 611570 |
| Pyruvate carboxylase deficiency                                                                                                                                                                                                                                                                         |                                                    | AR  | <i>PC</i>     | 608786 |
| Cytosolic phosphoenolpyruvate carboxykinase deficiency                                                                                                                                                                                                                                                  |                                                    | AR  | <i>PCK1</i>   | 614168 |
| <b>53. Disorders of glycolysis</b>                                                                                                                                                                                                                                                                      |                                                    |     |               |        |
| Hemolytic anemia due to hexokinase deficiency                                                                                                                                                                                                                                                           |                                                    | AR  | <i>HK1</i>    | 142600 |
| Hereditary motor and sensory neuropathy, Russe type                                                                                                                                                                                                                                                     | Charcot-Marie-Tooth disease type 4G                | AR  | <i>HK1</i>    | 142600 |
| Retinitis pigmentosa type 79                                                                                                                                                                                                                                                                            |                                                    | AD  | <i>HK1</i>    | 142600 |
| Glucokinase deficiency                                                                                                                                                                                                                                                                                  | Permanent neonatal diabetes mellitus; MODY type 2  | AD  | <i>GCK</i>    | 138079 |
| Glucokinase superactivity                                                                                                                                                                                                                                                                               | Familial hyperinsulinemic hypoglycemia type 3      | AD  | <i>GCK</i>    | 138079 |
| Glucose-6-phosphate isomerase deficiency                                                                                                                                                                                                                                                                |                                                    | AR  | <i>GPI</i>    | 172400 |
| Muscle phosphofructokinase deficiency                                                                                                                                                                                                                                                                   | Glycogen storage disease type 7; Tarui disease     | AR  | <i>PFKM</i>   | 610681 |
| Aldolase A deficiency                                                                                                                                                                                                                                                                                   | Glycogen storage disease type 12                   | AR  | <i>ALDOA</i>  | 103850 |
| Triose phosphate isomerase deficiency                                                                                                                                                                                                                                                                   |                                                    | AR  | <i>TPI1</i>   | 190450 |
| Phosphoglycerate kinase deficiency                                                                                                                                                                                                                                                                      |                                                    | XLR | <i>PGK1</i>   | 311800 |

|                                                                                                                   |                                                   |        |               |        |
|-------------------------------------------------------------------------------------------------------------------|---------------------------------------------------|--------|---------------|--------|
| Muscle phosphoglycerate mutase deficiency                                                                         | Glycogen storage disease type 10; DiMauro disease | AR     | <i>PGAM2</i>  | 612931 |
| Enolase $\beta$ deficiency                                                                                        | Glycogen storage disease type 13                  | AR     | <i>ENO3</i>   | 131370 |
| Pyruvate kinase deficiency                                                                                        |                                                   | AR     | <i>PKLR</i>   | 609712 |
| Lactate dehydrogenase A deficiency                                                                                | Glycogen storage disease type 11                  | AR     | <i>LDHA</i>   | 150000 |
| Lactate dehydrogenase B deficiency                                                                                |                                                   | AD, AR | <i>LDHB</i>   | 150100 |
| <b>D. MITOCHONDRIAL DISORDERS OF ENERGY METABOLISM</b>                                                            |                                                   |        |               |        |
| <b>54. Disorders of pyruvate metabolism</b>                                                                       |                                                   |        |               |        |
| Pyruvate dehydrogenase E1- $\alpha$ deficiency                                                                    |                                                   | XL     | <i>PDHA1</i>  | 300502 |
| Pyruvate dehydrogenase E1- $\beta$ deficiency                                                                     |                                                   | AR     | <i>PDHB</i>   | 179060 |
| Dihydrolipoamide acetyltransferase deficiency                                                                     | Pyruvate dehydrogenase E2 deficiency              | AR     | <i>DLAT</i>   | 608770 |
| Pyruvate dehydrogenase E3-binding protein deficiency                                                              | Pyruvate dehydrogenase component X deficiency     | AR     | <i>PDHX</i>   | 608769 |
| Pyruvate dehydrogenase phosphatase deficiency                                                                     |                                                   | AR     | <i>PDP1</i>   | 605993 |
| Mitochondrial pyruvate carrier deficiency                                                                         |                                                   | AR     | <i>MPC1</i>   | 614738 |
| Pyruvate dehydrogenase kinase isoenzyme 3 superactivity                                                           |                                                   | XLD    | <i>PDK3</i>   | 300906 |
| See also: Dihydrolipoamide dehydrogenase deficiency in group 14, and pyruvate carboxylase deficiency in group 52. |                                                   |        |               |        |
| <b>55. Disorders of the Krebs cycle</b>                                                                           |                                                   |        |               |        |
| Mitochondrial aconitase deficiency                                                                                | Infantile cerebellar-retinal degeneration         | AR     | <i>ACO2</i>   | 100850 |
| Mitochondrial NADH-dependent isocitrate dehydrogenase 2 superactivity                                             | D-2-hydroxyglutaric aciduria type 2               | AD     | <i>IDH2</i>   | 147650 |
| Mitochondrial NADPH-dependent isocitrate dehydrogenase 3 $\beta$ subunit deficiency                               |                                                   | AR     | <i>IDH3B</i>  | 604526 |
| ATP-specific succinyl-CoA ligase $\beta$ subunit deficiency                                                       | Mitochondrial DNA depletion syndrome type 5       | AR     | <i>SUCLA2</i> | 603921 |
| GTP-specific succinyl-CoA ligase $\alpha$ subunit deficiency                                                      | Mitochondrial DNA depletion syndrome type 9       | AR     | <i>SUCLG1</i> | 611224 |
| Fumarate hydratase deficiency                                                                                     | Fumarase deficiency                               | AR     | <i>FH</i>     | 136850 |
| Fumarate hydratase deficiency, tumoral phenotype                                                                  | Reed syndrome                                     | AD     | <i>FH</i>     | 136850 |

|                                                                                                                                                                                                                                                                                                                                                                                                                                                                                       |                                                                                                                    |        |                 |        |
|---------------------------------------------------------------------------------------------------------------------------------------------------------------------------------------------------------------------------------------------------------------------------------------------------------------------------------------------------------------------------------------------------------------------------------------------------------------------------------------|--------------------------------------------------------------------------------------------------------------------|--------|-----------------|--------|
| Mitochondrial malate dehydrogenase deficiency                                                                                                                                                                                                                                                                                                                                                                                                                                         | Early infantile epileptic encephalopathy type 51                                                                   | AR     | <i>MDH2</i>     | 154100 |
| See also: Dihydrolipoamide dehydrogenase deficiency in group 14, succinate dehydrogenase subunits A, B, C and D deficiencies in group 60, and succinate dehydrogenase assembly factors 1 and 2 deficiencies in group 61.                                                                                                                                                                                                                                                              |                                                                                                                    |        |                 |        |
| <b>56. Disorders of metabolite repair</b>                                                                                                                                                                                                                                                                                                                                                                                                                                             |                                                                                                                    |        |                 |        |
| D-2-hydroxyglutarate dehydrogenase deficiency                                                                                                                                                                                                                                                                                                                                                                                                                                         | D-2-hydroxyglutaric aciduria type 1                                                                                | AR     | <i>D2HGDH</i>   | 609186 |
| L-2-hydroxyglutarate dehydrogenase deficiency                                                                                                                                                                                                                                                                                                                                                                                                                                         | L-2-hydroxyglutaric aciduria                                                                                       | AR     | <i>L2HGDH</i>   | 609584 |
| See also: NAD(P)HX epimerase deficiency and NAD(P)HX dehydratase deficiency in group 31.                                                                                                                                                                                                                                                                                                                                                                                              |                                                                                                                    |        |                 |        |
| <b>57. Disorders of mitochondrial carriers</b>                                                                                                                                                                                                                                                                                                                                                                                                                                        |                                                                                                                    |        |                 |        |
| Adenine nucleotide translocator deficiency                                                                                                                                                                                                                                                                                                                                                                                                                                            | Mitochondrial DNA depletion syndrome type 12 (cardiomyopathic type); adPEO with mitochondrial DNA deletions type 2 | AD, AR | <i>SLC25A4</i>  | 103220 |
| Mitochondrial phosphate carrier deficiency                                                                                                                                                                                                                                                                                                                                                                                                                                            |                                                                                                                    | AR     | <i>SLC25A3</i>  | 600370 |
| Mitochondrial aspartate-glutamate carrier isoform 1 deficiency                                                                                                                                                                                                                                                                                                                                                                                                                        | Early infantile epileptic encephalopathy type 39; aralar 1 deficiency                                              | AR     | <i>SLC25A12</i> | 603667 |
| Cytosolic glycerol-3-phosphate dehydrogenase deficiency                                                                                                                                                                                                                                                                                                                                                                                                                               | Transient infantile hypertriglyceridemia                                                                           | AR     | <i>GPD1</i>     | 138420 |
| S-adenosylmethionine carrier deficiency                                                                                                                                                                                                                                                                                                                                                                                                                                               | Combined oxidative phosphorylation deficiency type 28                                                              | AR     | <i>SLC25A26</i> | 611037 |
| Mitochondrial citrate carrier deficiency                                                                                                                                                                                                                                                                                                                                                                                                                                              | Combined D-2- and L-2-hydroxyglutaric aciduria                                                                     | AR     | <i>SLC25A1</i>  | 190315 |
| Mitochondrial ATP-Mg/phosphate transporter deficiency                                                                                                                                                                                                                                                                                                                                                                                                                                 | Gorlin-Chaudhry-Moss syndrome; Fontaine syndrome                                                                   | AD     | <i>SLC25A24</i> | 608744 |
| See also: Mitochondrial ornithine transporter and citrin deficiencies in group 7, mitochondrial glutamate transporter deficiency in group 20, mitochondrial glycine transporter deficiency in group 24, mitochondrial thiamine pyrophosphate transporter deficiency in group 29, mitochondrial flavin adenine dinucleotide transporter deficiency in group 30, mitochondrial pyruvate carrier deficiency in group 54, and carnitine-acylcarnitine translocase deficiency in group 82. |                                                                                                                    |        |                 |        |
| <b>58. Disorders of complex I subunits</b>                                                                                                                                                                                                                                                                                                                                                                                                                                            |                                                                                                                    |        |                 |        |
| NADH dehydrogenase flavoprotein 1 deficiency                                                                                                                                                                                                                                                                                                                                                                                                                                          |                                                                                                                    | AR     | <i>NDUFV1</i>   | 161015 |
| NADH dehydrogenase flavoprotein 2 deficiency                                                                                                                                                                                                                                                                                                                                                                                                                                          |                                                                                                                    | AR     | <i>NDUFV2</i>   | 600532 |

|                                                              |                                                               |     |                |        |
|--------------------------------------------------------------|---------------------------------------------------------------|-----|----------------|--------|
| NADH dehydrogenase iron-sulfur protein 1 deficiency          |                                                               | AR  | <i>NDUFS1</i>  | 157655 |
| NADH dehydrogenase iron-sulfur protein 2 deficiency          |                                                               | AR  | <i>NDUFS2</i>  | 602985 |
| NADH dehydrogenase iron-sulfur protein 3 deficiency          |                                                               | AR  | <i>NDUFS3</i>  | 603846 |
| NADH dehydrogenase iron-sulfur protein 7 deficiency          |                                                               | AR  | <i>NDUFS7</i>  | 601825 |
| NADH dehydrogenase iron-sulfur protein 8 deficiency          |                                                               | AR  | <i>NDUFS8</i>  | 602141 |
| NADH dehydrogenase iron-sulfur protein 4 deficiency          |                                                               | AR  | <i>NDUFS4</i>  | 602694 |
| NADH dehydrogenase iron-sulfur protein 6 deficiency          |                                                               | AR  | <i>NDUFS6</i>  | 603848 |
| NADH dehydrogenase $\alpha$ subcomplex subunit 1 deficiency  |                                                               | XLR | <i>NDUFA1</i>  | 300078 |
| NADH dehydrogenase $\alpha$ subcomplex subunit 2 deficiency  |                                                               | AR  | <i>NDUFA2</i>  | 602137 |
| NADH dehydrogenase $\alpha$ subcomplex subunit 9 deficiency  |                                                               | AR  | <i>NDUFA9</i>  | 603834 |
| NADH dehydrogenase $\alpha$ subcomplex subunit 10 deficiency |                                                               | AR  | <i>NDUFA10</i> | 603835 |
| NADH dehydrogenase $\alpha$ subcomplex subunit 12 deficiency |                                                               | AR  | <i>NDUFA12</i> | 614530 |
| NADH dehydrogenase $\beta$ subcomplex subunit 3 deficiency   |                                                               | AR  | <i>NDUFB3</i>  | 603839 |
| NADH dehydrogenase $\beta$ subcomplex subunit 8 deficiency   |                                                               | AR  | <i>NDUFB8</i>  | 602140 |
| NADH dehydrogenase $\beta$ subcomplex subunit 11 deficiency  | Linear skin defects with multiple congenital anomalies type 3 | XL  | <i>NDUFB11</i> | 300403 |
| NADH dehydrogenase core subunit 1 deficiency                 |                                                               | Mit | <i>MT-ND1</i>  | 516000 |
| NADH dehydrogenase core subunit 2 deficiency                 |                                                               | Mit | <i>MT-ND2</i>  | 516001 |
| NADH dehydrogenase core subunit 3 deficiency                 |                                                               | Mit | <i>MT-ND3</i>  | 516002 |

|                                                                     |                                                                  |     |                 |        |
|---------------------------------------------------------------------|------------------------------------------------------------------|-----|-----------------|--------|
| NADH dehydrogenase core subunit 4 deficiency                        |                                                                  | Mit | <i>MT-ND4</i>   | 516003 |
| NADH dehydrogenase core subunit 4L deficiency                       |                                                                  | Mit | <i>MT-ND4L</i>  | 516004 |
| NADH dehydrogenase core subunit 5 deficiency                        |                                                                  | Mit | <i>MT-ND5</i>   | 516005 |
| NADH dehydrogenase core subunit 6 deficiency                        |                                                                  | Mit | <i>MT-ND6</i>   | 516006 |
| <b>59. Disorders of complex I assembly</b>                          |                                                                  |     |                 |        |
| NADH dehydrogenase $\alpha$ subcomplex assembly factor 1 deficiency |                                                                  | AR  | <i>NDUFAF1</i>  | 606934 |
| NADH dehydrogenase $\alpha$ subcomplex assembly factor 2 deficiency |                                                                  | AR  | <i>NDUFAF2</i>  | 609653 |
| NADH dehydrogenase $\alpha$ subcomplex assembly factor 3 deficiency |                                                                  | AR  | <i>NDUFAF3</i>  | 612911 |
| NADH dehydrogenase $\alpha$ subcomplex assembly factor 4 deficiency |                                                                  | AR  | <i>NDUFAF4</i>  | 611776 |
| NADH dehydrogenase $\alpha$ subcomplex assembly factor 5 deficiency |                                                                  | AR  | <i>NDUFAF5</i>  | 612360 |
| NADH dehydrogenase $\alpha$ subcomplex assembly factor 6 deficiency |                                                                  | AR  | <i>NDUFAF6</i>  | 612392 |
| FOXRED1 deficiency                                                  |                                                                  | AR  | <i>FOXRED1</i>  | 613622 |
| NUBPL deficiency                                                    |                                                                  | AR  | <i>NUBPL</i>    | 613621 |
| ACAD9 deficiency                                                    |                                                                  | AR  | <i>ACAD9</i>    | 611103 |
| Transmembrane protein 126B deficiency                               |                                                                  | AR  | <i>TMEM126B</i> | 615533 |
| <b>60. Disorders of complex II subunits</b>                         |                                                                  |     |                 |        |
| Succinate dehydrogenase subunit A deficiency                        |                                                                  | AR  | <i>SDHA</i>     | 600857 |
| Succinate dehydrogenase subunit A deficiency, tumoral phenotype     | Hereditary paraganglioma syndrome type 5                         | AD  | <i>SDHA</i>     | 600857 |
| Succinate dehydrogenase subunit B deficiency                        |                                                                  | AR  | <i>SDHB</i>     | 185470 |
| Succinate dehydrogenase subunit B deficiency, tumoral phenotype     | Hereditary paraganglioma syndrome type 4; Cowden syndrome type 2 | AD  | <i>SDHB</i>     | 185470 |



|                                                                                 |                                                                                         |     |               |        |
|---------------------------------------------------------------------------------|-----------------------------------------------------------------------------------------|-----|---------------|--------|
| Succinate dehydrogenase subunit C deficiency, tumoral phenotype                 | Hereditary paraganglioma syndrome type 3                                                | AD  | <i>SDHC</i>   | 602413 |
| Succinate dehydrogenase subunit D deficiency                                    |                                                                                         | AR  | <i>SDHD</i>   | 602690 |
| Succinate dehydrogenase subunit D deficiency, tumoral phenotype                 | Hereditary paraganglioma syndrome type 1; Cowden syndrome type 3                        | AD  | <i>SDHD</i>   | 602690 |
| <b>61. Disorders of complex II assembly</b>                                     |                                                                                         |     |               |        |
| Succinate dehydrogenase complex assembly factor 1 deficiency                    |                                                                                         | AR  | <i>SDHAF1</i> | 612848 |
| Succinate dehydrogenase complex assembly factor 2 deficiency, tumoral phenotype | Hereditary paraganglioma syndrome type 2                                                | AD  | <i>SDHAF2</i> | 613019 |
| <b>62. Disorders of complex III subunits</b>                                    |                                                                                         |     |               |        |
| UQCRB deficiency                                                                |                                                                                         | AR  | <i>UQCRB</i>  | 191330 |
| UQCRC2 deficiency                                                               |                                                                                         | AR  | <i>UQCRC2</i> | 191329 |
| See also: Mitochondrial cytochrome c1 deficiency in group 68.                   |                                                                                         |     |               |        |
| <b>63. Disorders of complex III assembly</b>                                    |                                                                                         |     |               |        |
| BCS1L deficiency                                                                | GRACILE syndrome; Björnstad syndrome                                                    | AR  | <i>BCS1L</i>  | 603647 |
| TTC19 deficiency                                                                |                                                                                         | AR  | <i>TTC19</i>  | 613814 |
| UQCC2 deficiency                                                                |                                                                                         | AR  | <i>UQCC2</i>  | 614461 |
| LYRM7 deficiency                                                                |                                                                                         | AR  | <i>LYRM7</i>  | 615831 |
| <b>64. Disorders of complex IV subunits</b>                                     |                                                                                         |     |               |        |
| Cytochrome c oxidase subunit 1 deficiency                                       |                                                                                         | Mit | <i>MT-CO1</i> | 516030 |
| Cytochrome c oxidase subunit 2 deficiency                                       |                                                                                         | Mit | <i>MT-CO2</i> | 516040 |
| Cytochrome c oxidase subunit 3 deficiency                                       |                                                                                         | Mit | <i>MT-CO3</i> | 516050 |
| Cytochrome c oxidase subunit 4I2 deficiency                                     | Exocrine pancreatic insufficiency, dyserythropoietic anemia, and calvarial hyperostosis | AR  | <i>COX4I2</i> | 607976 |
| Cytochrome c oxidase subunit 6A1 deficiency                                     | Recessive intermediate Charcot-Marie-Tooth disease type D                               | AR  | <i>COX6A1</i> | 602072 |
| Cytochrome c oxidase subunit 6B1 deficiency                                     |                                                                                         | AR  | <i>COX6B1</i> | 124089 |

|                                                                              |                                                               |     |                |        |
|------------------------------------------------------------------------------|---------------------------------------------------------------|-----|----------------|--------|
| Cytochrome c oxidase subunit 7B deficiency                                   | Linear skin defects with multiple congenital anomalies type 2 | XL  | <i>COX7B</i>   | 300885 |
| <b>65. Disorders of complex IV assembly and ancillary proteins</b>           |                                                               |     |                |        |
| Cytochrome c oxidase assembly factor 6 deficiency                            |                                                               | AR  | <i>COA6</i>    | 614772 |
| COX10 deficiency                                                             |                                                               | AR  | <i>COX10</i>   | 602125 |
| COX15 deficiency                                                             |                                                               | AR  | <i>COX15</i>   | 603646 |
| COX20 deficiency                                                             |                                                               | AR  | <i>COX20</i>   | 614698 |
| SCO1 deficiency                                                              |                                                               | AR  | <i>SCO1</i>    | 603644 |
| SCO2 deficiency                                                              |                                                               | AR  | <i>SCO2</i>    | 604272 |
| SURF1 deficiency                                                             |                                                               | AR  | <i>SURF1</i>   | 185620 |
| LRPPRC deficiency                                                            |                                                               | AR  | <i>LRPPRC</i>  | 607544 |
| TACO1 deficiency                                                             |                                                               | AR  | <i>TACO1</i>   | 612958 |
| PET100 deficiency                                                            |                                                               | AR  | <i>PET100</i>  | 614770 |
| FASTKD2 deficiency                                                           |                                                               | AR  | <i>FASTKD2</i> | 612322 |
| APOPT1 deficiency                                                            |                                                               | AR  | <i>APOPT1</i>  | 616003 |
| See also: Mitochondrial phosphate carrier deficiency in group 57.            |                                                               |     |                |        |
| <b>66. Disorders of complex V subunits</b>                                   |                                                               |     |                |        |
| Mitochondrial ATP synthase F1 subunit $\alpha$ deficiency                    |                                                               | AR  | <i>ATP5F1A</i> | 164360 |
| Mitochondrial ATP synthase F1 subunit $\delta$ deficiency                    |                                                               | AR  | <i>ATP5F1D</i> | 603150 |
| Mitochondrial ATP synthase F1 subunit $\epsilon$ deficiency                  |                                                               | AR  | <i>ATP5F1E</i> | 606153 |
| Mitochondrial ATP synthase F0 subunit 6 deficiency                           |                                                               | Mit | <i>MT-ATP6</i> | 516060 |
| Mitochondrial ATP synthase F0 subunit 8 deficiency                           |                                                               | Mit | <i>MT-ATP8</i> | 516070 |
| <b>67. Disorders of complex V assembly</b>                                   |                                                               |     |                |        |
| Transmembrane protein 70 deficiency                                          |                                                               | AR  | <i>TMEM70</i>  | 612418 |
| <b>68. Disorders of mitochondrial cytochrome synthesis and incorporation</b> |                                                               |     |                |        |
| Mitochondrial cytochrome b deficiency                                        |                                                               | Mit | <i>MT-CYB</i>  | 516020 |
| Mitochondrial cytochrome c1 deficiency                                       |                                                               | AR  | <i>CYC1</i>    | 123980 |
| Mitochondrial cytochrome c deficiency                                        | Thrombocytopenia type 4                                       | AD  | <i>CYCS</i>    | 123970 |

|                                                                                                                                                                                                        |                                                                                                                                                        |        |                |        |
|--------------------------------------------------------------------------------------------------------------------------------------------------------------------------------------------------------|--------------------------------------------------------------------------------------------------------------------------------------------------------|--------|----------------|--------|
| Holocytochrome c synthase deficiency                                                                                                                                                                   | Linear skin defects with multiple congenital anomalies type 1                                                                                          | XLD    | <i>HCCS</i>    | 300056 |
| <b>69. Disorders of mitochondrial DNA depletion, multiple deletion, or intergenomic communication</b>                                                                                                  |                                                                                                                                                        |        |                |        |
| Mitochondrial DNA polymerase $\gamma$ catalytic subunit deficiency                                                                                                                                     | Mitochondrial DNA depletion syndrome type 1; Alpers-Huttenlocher syndrome; mitochondrial recessive ataxia syndrome (MIRAS); arPEO type 1; adPEO type 1 | AD, AR | <i>POLG</i>    | 174763 |
| Mitochondrial DNA polymerase $\gamma$ accessory subunit deficiency                                                                                                                                     | adPEO with mitochondrial DNA deletions type 4                                                                                                          | AD     | <i>POLG2</i>   | 604983 |
| Mitochondrial deoxyguanosine kinase deficiency                                                                                                                                                         | Mitochondrial DNA depletion syndrome type 3; arPEO with mitochondrial DNA deletions type 4; noncirrhotic portal hypertension                           | AR     | <i>DGUOK</i>   | 601465 |
| MPV17 deficiency                                                                                                                                                                                       | Mitochondrial DNA depletion syndrome type 6                                                                                                            | AR     | <i>MPV17</i>   | 137960 |
| TWINKLE mitochondrial DNA helicase deficiency                                                                                                                                                          | Mitochondrial DNA depletion syndrome type 7; Perrault syndrome type 5; arPEO with mitochondrial DNA deletions type 5                                   | AR     | <i>TWINK</i>   | 606075 |
| Mitochondrial thymidine kinase deficiency                                                                                                                                                              | Mitochondrial DNA depletion syndrome type 2                                                                                                            | AR     | <i>TK2</i>     | 188250 |
| Mitochondrial ribonucleotide reductase small subunit deficiency                                                                                                                                        | Mitochondrial DNA depletion syndrome type 8; adPEO with mitochondrial DNA deletions type 5                                                             | AD, AR | <i>RRM2B</i>   | 604712 |
| Thymidine phosphorylase deficiency                                                                                                                                                                     | Mitochondrial neurogastrointestinal encephalopathy syndrome                                                                                            | AR     | <i>TYMP</i>    | 131222 |
| DNA2 helicase deficiency                                                                                                                                                                               | adPEO with mitochondrial DNA deletions type 6                                                                                                          | AD     | <i>DNA2</i>    | 601810 |
| Mitochondrial ribonuclease H1 deficiency                                                                                                                                                               | arPEO with mitochondrial DNA deletions type 2                                                                                                          | AR     | <i>RNASEH1</i> | 604123 |
| Mitochondrial genome maintenance exonuclease 1 deficiency                                                                                                                                              | Mitochondrial DNA depletion syndrome type 11                                                                                                           | AR     | <i>MGME1</i>   | 615076 |
| FBXL4 deficiency                                                                                                                                                                                       | Mitochondrial DNA depletion syndrome type 13                                                                                                           | AR     | <i>FBXL4</i>   | 605654 |
| See also: ATP-specific succinyl-CoA ligase $\beta$ subunit and GTP-specific succinyl-CoA ligase $\alpha$ subunit deficiencies in group 55, and adenine nucleotide translocator deficiency in group 57. |                                                                                                                                                        |        |                |        |
| <b>70. Disorders of mitochondrial transcription and RNA transcript processing</b>                                                                                                                      |                                                                                                                                                        |        |                |        |
| Mitochondrial RNA import protein deficiency                                                                                                                                                            | Combined oxidative phosphorylation deficiency type 13                                                                                                  | AR     | <i>PNPT1</i>   | 610316 |
| Ribonuclease P 5' tRNA processing enzyme deficiency                                                                                                                                                    | Combined oxidative phosphorylation deficiency 30                                                                                                       | AR     | <i>TRMT10C</i> | 615423 |

|                                                                       |                                                                                                                                                                   |    |               |        |
|-----------------------------------------------------------------------|-------------------------------------------------------------------------------------------------------------------------------------------------------------------|----|---------------|--------|
| Ribonuclease Z 3' tRNA processing enzyme deficiency                   | Combined oxidative phosphorylation deficiency 17                                                                                                                  | AR | <i>ELAC2</i>  | 605367 |
| Mitochondrial poly(A) polymerase deficiency                           |                                                                                                                                                                   | AR | <i>MTPAP</i>  | 613669 |
| CCA-adding tRNA-nucleotidyltransferase deficiency                     | Sideroblastic anemia with B-cell immunodeficiency, periodic fevers, and developmental delay (severe); retinitis pigmentosa and erythrocytic microcytosis (milder) | AR | <i>TRNT1</i>  | 612907 |
| Mitochondrial methionyl-tRNA formyltransferase deficiency             | Combined oxidative phosphorylation deficiency type 15                                                                                                             | AR | <i>MTFMT</i>  | 611766 |
| tRNA 5-taurinomethyluridine modifier deficiency                       | Combined oxidative phosphorylation deficiency type 23                                                                                                             | AR | <i>GTPBP3</i> | 608536 |
| tRNA 5-carboxymethylaminomethyl transferase deficiency                | Combined oxidative phosphorylation deficiency type 10                                                                                                             | AR | <i>MTO1</i>   | 614667 |
| Pseudouridine synthase 1 deficiency                                   | Myopathy, lactic acidosis, and sideroblastic anemia type 1                                                                                                        | AR | <i>PUS1</i>   | 608109 |
| tRNA isopentenyl transferase deficiency                               |                                                                                                                                                                   | AR | <i>TRIT1</i>  | 617840 |
| tRNA methyltransferase 5 deficiency                                   | Combined oxidative phosphorylation deficiency type 26                                                                                                             | AR | <i>TRMT5</i>  | 611023 |
| tRNA 5-methylaminomethyl-2-thiouridylate-methyltransferase deficiency | Transient infantile liver failure                                                                                                                                 | AR | <i>TRMU</i>   | 610230 |
| Mitochondrial RNA-processing endoribonuclease deficiency              | Cartilage-hair hypoplasia; metaphyseal dysplasia without hypotrichosis; anauxetic dysplasia type 1                                                                | AR | <i>RMRP</i>   | 157660 |
| See also: HSD10 disease in group 14.                                  |                                                                                                                                                                   |    |               |        |
| <b>71. Mitochondrial ribosomopathies</b>                              |                                                                                                                                                                   |    |               |        |
| Mitochondrial ribosomal large subunit 3 deficiency                    | Combined oxidative phosphorylation deficiency type 9                                                                                                              | AR | <i>MRPL3</i>  | 607118 |
| Mitochondrial ribosomal large subunit 44 deficiency                   | Combined oxidative phosphorylation deficiency type 16                                                                                                             | AR | <i>MRPL44</i> | 611849 |
| Mitochondrial ribosomal small subunit 16 deficiency                   | Combined oxidative phosphorylation deficiency type 2                                                                                                              | AR | <i>MRPS16</i> | 609204 |
| Mitochondrial ribosomal small subunit 22 deficiency                   | Combined oxidative phosphorylation deficiency type 5                                                                                                              | AR | <i>MRPS22</i> | 605810 |
| Mitochondrial ribosomal small subunit 34 deficiency                   | Combined oxidative phosphorylation deficiency type 32                                                                                                             | AR | <i>MRPS34</i> | 611994 |

|                                                           |                                                                                                      |     |                 |        |
|-----------------------------------------------------------|------------------------------------------------------------------------------------------------------|-----|-----------------|--------|
| Mitochondrial ribosomal RNA 12S deficiency                |                                                                                                      | Mit | <i>MT-RNR1</i>  | 561000 |
| Mitochondrial ribosomal RNA 16S deficiency                |                                                                                                      | Mit | <i>MT-RNR2</i>  | 561010 |
| <b>72. Disorders of mitochondrial translation factors</b> |                                                                                                      |     |                 |        |
| RMND1 deficiency                                          | Combined oxidative phosphorylation deficiency type 11                                                | AR  | <i>RMND1</i>    | 614917 |
| Mitochondrial elongation factor G1 deficiency             | Combined oxidative phosphorylation deficiency type 1                                                 | AR  | <i>GFM1</i>     | 606639 |
| Mitochondrial elongation factor G2 deficiency             |                                                                                                      | AR  | <i>GFM2</i>     | 606544 |
| Mitochondrial elongation factor Ts deficiency             | Combined oxidative phosphorylation deficiency type 3                                                 | AR  | <i>TSFM</i>     | 604723 |
| Mitochondrial elongation factor Tu deficiency             | Combined oxidative phosphorylation deficiency type 4                                                 | AR  | <i>TUFM</i>     | 602389 |
| C12orf65 release factor deficiency                        | Combined oxidative phosphorylation deficiency type 7; autosomal recessive spastic paraplegia type 55 | AR  | <i>C12orf65</i> | 613541 |
| <b>73. Disorders of mitochondrial tRNA</b>                |                                                                                                      |     |                 |        |
| Mitochondrial tRNA(Ala) deficiency                        |                                                                                                      | Mit | <i>MT-TA</i>    | 590000 |
| Mitochondrial tRNA(Arg) deficiency                        |                                                                                                      | Mit | <i>MT-TR</i>    | 590005 |
| Mitochondrial tRNA(Asn) deficiency                        |                                                                                                      | Mit | <i>MT-TN</i>    | 590010 |
| Mitochondrial tRNA(Asp) deficiency                        |                                                                                                      | Mit | <i>MT-TD</i>    | 590015 |
| Mitochondrial tRNA(Cys) deficiency                        |                                                                                                      | Mit | <i>MT-TC</i>    | 590020 |
| Mitochondrial tRNA(Glu) deficiency                        |                                                                                                      | Mit | <i>MT-TE</i>    | 590025 |
| Mitochondrial tRNA(Gln) deficiency                        |                                                                                                      | Mit | <i>MT-TQ</i>    | 590030 |
| Mitochondrial tRNA(Gly) deficiency                        |                                                                                                      | Mit | <i>MT-TG</i>    | 590035 |
| Mitochondrial tRNA(His) deficiency                        |                                                                                                      | Mit | <i>MT-TH</i>    | 590040 |
| Mitochondrial tRNA(Ile) deficiency                        |                                                                                                      | Mit | <i>MT-TI</i>    | 590045 |
| Mitochondrial tRNA(Leu) 1 deficiency                      |                                                                                                      | Mit | <i>MT-TL1</i>   | 590050 |
| Mitochondrial tRNA(Leu) 2 deficiency                      |                                                                                                      | Mit | <i>MT-TL2</i>   | 590055 |
| Mitochondrial tRNA(Lys) deficiency                        |                                                                                                      | Mit | <i>MT-TK</i>    | 590060 |
| Mitochondrial tRNA(Met) deficiency                        |                                                                                                      | Mit | <i>MT-TM</i>    | 590065 |
| Mitochondrial tRNA(Phe) deficiency                        |                                                                                                      | Mit | <i>MT-TF</i>    | 590070 |
| Mitochondrial tRNA(Pro) deficiency                        |                                                                                                      | Mit | <i>MT-TP</i>    | 590075 |
| Mitochondrial tRNA(Ser) 1 deficiency                      |                                                                                                      | Mit | <i>MT-TS1</i>   | 590080 |

|                                                                        |                                                                                                                       |     |               |        |
|------------------------------------------------------------------------|-----------------------------------------------------------------------------------------------------------------------|-----|---------------|--------|
| Mitochondrial tRNA(Ser) 2 deficiency                                   |                                                                                                                       | Mit | <i>MT-TS2</i> | 590085 |
| Mitochondrial tRNA(Thr) deficiency                                     |                                                                                                                       | Mit | <i>MT-TT</i>  | 590090 |
| Mitochondrial tRNA(Trp) deficiency                                     |                                                                                                                       | Mit | <i>MT-TW</i>  | 590095 |
| Mitochondrial tRNA(Tyr) deficiency                                     |                                                                                                                       | Mit | <i>MT-TY</i>  | 590100 |
| Mitochondrial tRNA(Val) deficiency                                     |                                                                                                                       | Mit | <i>MT-TV</i>  | 590105 |
| <b>74. Disorders of mitochondrial tRNA incorporation and recycling</b> |                                                                                                                       |     |               |        |
| Mitochondrial alanyl-tRNA synthetase deficiency                        | Combined oxidative phosphorylation deficiency type 8; progressive leukoencephalopathy with ovarian failure            | AR  | <i>AARS2</i>  | 612035 |
| Mitochondrial arginine-tRNA synthetase deficiency                      | Pontocerebellar hypoplasia type 6                                                                                     | AR  | <i>RARS2</i>  | 611524 |
| Mitochondrial asparaginyl-tRNA synthetase deficiency                   | Combined oxidative phosphorylation deficiency type 24                                                                 | AR  | <i>NARS2</i>  | 612803 |
| Mitochondrial aspartyl-tRNA synthetase deficiency                      | Leukoencephalopathy with brain stem and spinal cord involvement and lactate elevation                                 | AR  | <i>DARS2</i>  | 610956 |
| Mitochondrial cysteinyl-tRNA synthetase deficiency                     | Combined oxidative phosphorylation deficiency type 27                                                                 | AR  | <i>CARS2</i>  | 612800 |
| Mitochondrial glutamyl-tRNA synthetase deficiency                      | Combined oxidative phosphorylation deficiency type 12                                                                 | AR  | <i>EARS2</i>  | 612799 |
| Mitochondrial histidyl-tRNA synthetase deficiency                      | Perrault syndrome type 2                                                                                              | AR  | <i>HARS2</i>  | 600783 |
| Mitochondrial isoleucyl-tRNA synthetase deficiency                     | Cataracts, growth hormone deficiency, sensory neuropathy, sensorineural hearing loss, and skeletal dysplasia (CAGSSS) | AR  | <i>IARS2</i>  | 612801 |
| Mitochondrial leucyl-tRNA synthetase deficiency                        | Perrault syndrome type 4                                                                                              | AR  | <i>LARS2</i>  | 604544 |
| Mitochondrial methionyl-tRNA synthetase deficiency                     | Autosomal recessive spastic ataxia type 3                                                                             | AR  | <i>MARS2</i>  | 609728 |
| Mitochondrial phenylalanyl-tRNA synthetase deficiency                  | Combined oxidative phosphorylation deficiency type 14; autosomal recessive spastic paraplegia type 77                 | AR  | <i>FARS2</i>  | 611592 |
| Mitochondrial seryl-tRNA synthetase deficiency                         | Hyperuricemia, pulmonary hypertension, renal failure, and alkalosis (HUPRA)                                           | AR  | <i>SARS2</i>  | 612804 |
| Mitochondrial tyrosyl-tRNA synthetase deficiency                       | Myopathy, lactic acidosis, and sideroblastic anemia type 2                                                            | AR  | <i>YARS2</i>  | 610957 |

|                                                                 |                                                                                                                 |        |                 |        |
|-----------------------------------------------------------------|-----------------------------------------------------------------------------------------------------------------|--------|-----------------|--------|
| Mitochondrial valyl-tRNA synthetase deficiency                  | Combined oxidative phosphorylation deficiency type 20                                                           | AR     | <i>VAR2</i>     | 612802 |
| Mitochondrial tryptophanyl-tRNA synthetase deficiency           | Mitochondrial neurodevelopmental disorder with abnormal movements and lactic acidosis, with or without seizures | AR     | <i>WARS2</i>    | 604733 |
| Mitochondrial and cytoplasmic glycyl-tRNA synthetase deficiency | Charcot-Marie-Tooth disease type 2D; distal hereditary motor neuropathy type 5A                                 | AD     | <i>GARS</i>     | 600287 |
| Mitochondrial and cytoplasmic lysyl-tRNA synthetase deficiency  |                                                                                                                 | AR     | <i>KARS</i>     | 601421 |
| Peptidyl-tRNA hydrolase 2 deficiency                            | Infantile-onset multisystem neurologic, endocrine, and pancreatic disease                                       | AR     | <i>PTRH2</i>    | 608625 |
| <b>75. Disorders of mitochondrial fission</b>                   |                                                                                                                 |        |                 |        |
| Dynammin-like protein 1 deficiency                              | Optic atrophy type 5; encephalopathy due to defective mitochondrial and peroxisomal fission type 1              | AD, AR | <i>DNM1L</i>    | 603850 |
| Mitochondrial fission factor deficiency                         | Encephalopathy due to defective mitochondrial and peroxisomal fission type 2                                    | AR     | <i>MFF</i>      | 614785 |
| GDAP1 deficiency                                                | Axonal Charcot-Marie-Tooth type 2K; demyelinating Charcot-Marie-Tooth disease type 4A                           | AD, AR | <i>GDAP1</i>    | 606598 |
| STAT2 deficiency                                                | Immunodeficiency type 44                                                                                        | AR     | <i>STAT2</i>    | 600556 |
| UGO-1 like protein deficiency                                   | Hereditary motor and sensory neuropathy type 6B                                                                 | AR     | <i>SLC25A46</i> | 610826 |
| <b>76. Disorders of mitochondrial fusion</b>                    |                                                                                                                 |        |                 |        |
| OPA1 deficiency                                                 | Optic atrophy type 1 (dominant); Behr syndrome (recessive)                                                      | AD, AR | <i>OPA1</i>     | 605290 |
| OPA3 deficiency                                                 | Optic atrophy type 3 (dominant); 3-methylglutaconic aciduria type 3, Costeff syndrome (recessive)               | AD, AR | <i>OPA3</i>     | 606580 |
| Mitofusin 2 deficiency                                          | Axonal Charcot-Marie-Tooth type 2A2                                                                             | AD, AR | <i>MFN2</i>     | 608507 |
| MSTO1 deficiency                                                | Mitochondrial myopathy and ataxia                                                                               | AD, AR | <i>MSTO1</i>    | 617619 |
| <b>77. Disorders of mitochondrial phospholipid metabolism</b>   |                                                                                                                 |        |                 |        |
| Acylglycerol kinase deficiency                                  | Sengers syndrome                                                                                                | AR     | <i>AGK</i>      | 610345 |
| SERAC1 deficiency                                               | 3-methylglutaconic aciduria with deafness, encephalopathy, and Leigh-like syndrome (MEGDEL)                     | AR     | <i>SERAC1</i>   | 614725 |
| Taffazin deficiency                                             | Barth syndrome                                                                                                  | XLR    | <i>TAZ</i>      | 300394 |
| PNPLA8 deficiency                                               | Mitochondrial myopathy with lactic acidosis                                                                     | AR     | <i>PNPLA8</i>   | 612123 |

| <b>78. Disorders of mitochondrial protein import</b>          |                                                                                                                   |        |                |        |
|---------------------------------------------------------------|-------------------------------------------------------------------------------------------------------------------|--------|----------------|--------|
| DNAJC19 deficiency                                            | Dilated cardiomyopathy with ataxia (DCMA syndrome); 3-methylglutaconic aciduria type 5                            | AR     | <i>DNAJC19</i> | 608977 |
| TIMM8A deficiency                                             | Mohr-Tranebjaerg syndrome                                                                                         | XLR    | <i>TIMM8A</i>  | 300356 |
| TIMMDC1 deficiency                                            |                                                                                                                   | AR     | <i>TIMMDC1</i> | 615534 |
| TIMM50 deficiency                                             | 3-methylglutaconic aciduria type 9                                                                                | AR     | <i>TIMM50</i>  | 607381 |
| GFER deficiency                                               |                                                                                                                   | AR     | <i>GFER</i>    | 600924 |
| MAGMAS deficiency                                             | Spondylometaphyseal dysplasia, Megarbane-Dagher-Melike type                                                       | AR     | <i>PAM16</i>   | 614336 |
| See also: Acylglycerol kinase deficiency in group 77.         |                                                                                                                   |        |                |        |
| <b>79. Disorders of mitochondrial protein quality control</b> |                                                                                                                   |        |                |        |
| Mitochondrial processing peptidase alpha deficiency           | Autosomal recessive spinocerebellar ataxia type 2                                                                 | AR     | <i>PMPCA</i>   | 613036 |
| Mitochondrial intermediate peptidase deficiency               | Combined oxidative phosphorylation deficiency type 31                                                             | AR     | <i>MIPEP</i>   | 602241 |
| CLPB deficiency                                               | 3-methylglutaconic aciduria type 7, with cataracts, neurologic involvement and neutropenia                        | AR     | <i>CLPB</i>    | 616254 |
| CLPP deficiency                                               | Perrault syndrome type 3                                                                                          | AR     | <i>CLPP</i>    | 601119 |
| LONP1 deficiency                                              | Cerebral, ocular, dental, auricular, and skeletal (CODAS) syndrome                                                | AR     | <i>LONP1</i>   | 605490 |
| HSPA9 deficiency                                              | Sideroblastic anemia type 4; epiphyseal, vertebral, ear, nose, plus associated malformations (EVEN-plus) syndrome | AR     | <i>HSPA9</i>   | 600548 |
| HSP60 deficiency                                              | Hypomyelinating leukodystrophy type 4 (recessive); autosomal dominant spastic paraplegia type 13                  | AD, AR | <i>HSPD1</i>   | 118190 |
| Sacsin deficiency                                             | Autosomal recessive spastic ataxia of Charlevoix-Saguenay                                                         | AR     | <i>SACS</i>    | 604490 |
| m-AAA protease AFG3L2 subunit deficiency                      | Autosomal recessive spastic ataxia type 5; spinocerebellar ataxia type 28                                         | AR     | <i>AFG3L2</i>  | 604581 |
| Paraplegin deficiency                                         | Spastic paraplegia type 7                                                                                         | AD, AR | <i>SPG7</i>    | 602783 |
| HTRA2 deficiency                                              | 3-methylglutaconic aciduria type 8                                                                                | AR     | <i>HTRA2</i>   | 606441 |
| Parkin deficiency                                             | Early-onset Parkinson disease type 2                                                                              | AR     | <i>PRKN</i>    | 602544 |
| PINK1 deficiency                                              | Early-onset Parkinson disease type 6                                                                              | AR     | <i>PINK1</i>   | 608309 |
| USP9X deficiency                                              | X-linked mental retardation type 99                                                                               | XL     | <i>USP9X</i>   | 300072 |



|                                                             |                                                                                           |        |                 |        |
|-------------------------------------------------------------|-------------------------------------------------------------------------------------------|--------|-----------------|--------|
| Valosin-containing protein superactivity                    | Inclusion body myopathy with early-onset Paget disease and frontotemporal dementia type 1 | AD     | <i>VCP</i>      | 601023 |
| See also: X-prolyl aminopeptidase 3 deficiency in group 16. |                                                                                           |        |                 |        |
| <b>80. Other disorders of mitochondrial homeostasis</b>     |                                                                                           |        |                 |        |
| Mitochondrial inorganic pyrophosphatase 2 deficiency        |                                                                                           | AR     | <i>PPA2</i>     | 609988 |
| Sideroflexin 4 deficiency                                   | Combined oxidative phosphorylation deficiency type 18                                     | AR     | <i>SFXN4</i>    | 615564 |
| AIFM1 deficiency                                            | Combined oxidative phosphorylation deficiency type 6; Cowchock syndrome                   | XLR    | <i>AIFM1</i>    | 300169 |
| ATAD3A deficiency                                           | Harel-Yoon syndrome                                                                       | AD, AR | <i>ATAD3A</i>   | 612316 |
| Transmembrane protein 126A deficiency                       | Optic atrophy type 7                                                                      | AR     | <i>TMEM126A</i> | 612988 |
| C1q binding protein deficiency                              | Combined oxidative phosphorylation deficiency type 33                                     | AR     | <i>C1QBP</i>    | 601269 |
| Trafficking kinesin-binding protein 1 deficiency            |                                                                                           | AR     | <i>TRAK1</i>    | 608112 |
| Mitochondrial calcium uniporter deficiency                  | Myopathy with extrapyramidal signs                                                        | AR     | <i>MICU1</i>    | 605084 |
| Nogo-interacting mitochondrial protein deficiency           | Optic atrophy type 10                                                                     | AR     | <i>RTN4IP1</i>  | 610502 |
| <b>81. Primary CoQ10 deficiencies</b>                       |                                                                                           |        |                 |        |
| Prenyl diphosphate synthase subunit 1 deficiency            | Primary coenzyme Q10 deficiency type 2                                                    | AR     | <i>PDSS1</i>    | 607429 |
| Prenyl diphosphate synthase subunit 2 deficiency            | Primary coenzyme Q10 deficiency type 3                                                    | AR     | <i>PDSS2</i>    | 610564 |
| COQ2 deficiency                                             | Primary coenzyme Q10 deficiency type 1                                                    | AR     | <i>COQ2</i>     | 609825 |
| COQ4 deficiency                                             | Primary coenzyme Q10 deficiency type 7                                                    | AR     | <i>COQ4</i>     | 612898 |
| COQ6 deficiency                                             | Primary coenzyme Q10 deficiency type 6                                                    | AR     | <i>COQ6</i>     | 614647 |
| COQ7 deficiency                                             | Primary coenzyme Q10 deficiency type 8                                                    | AR     | <i>COQ7</i>     | 601683 |
| COQ8A deficiency                                            | Primary coenzyme Q10 deficiency type 4; ADCK3 deficiency                                  | AR     | <i>COQ8A</i>    | 606980 |
| COQ8B deficiency                                            | Nephrotic syndrome type 9; ADCK4 deficiency                                               | AR     | <i>COQ8B</i>    | 615567 |
| COQ9 deficiency                                             | Primary coenzyme Q10 deficiency type 5                                                    | AR     | <i>COQ9</i>     | 612837 |

## E. DISORDERS OF LIPIDS

| <b>82. Disorders of carnitine metabolism</b>                     |                                                                                                                        |     |                 |        |
|------------------------------------------------------------------|------------------------------------------------------------------------------------------------------------------------|-----|-----------------|--------|
| Primary carnitine deficiency                                     |                                                                                                                        | AR  | <i>SLC22A5</i>  | 603377 |
| Carnitine palmitoyltransferase 1A deficiency                     |                                                                                                                        | AR  | <i>CPT1A</i>    | 600528 |
| Carnitine palmitoyltransferase 2 deficiency                      |                                                                                                                        | AR  | <i>CPT2</i>     | 600650 |
| Carnitine-acylcarnitine translocase deficiency                   |                                                                                                                        | AR  | <i>SLC25A20</i> | 613698 |
| $\epsilon$ -N-trimethyllysine hydroxylase deficiency             |                                                                                                                        | XLR | <i>TMHLE</i>    | 300777 |
| <b>83. Disorders of fatty acid oxidation and transport</b>       |                                                                                                                        |     |                 |        |
| Short-chain acyl-CoA dehydrogenase deficiency                    |                                                                                                                        | AR  | <i>ACADS</i>    | 606885 |
| Medium-chain acyl-CoA dehydrogenase deficiency                   |                                                                                                                        | AR  | <i>ACADM</i>    | 607008 |
| Very long-chain acyl-CoA dehydrogenase deficiency                |                                                                                                                        | AR  | <i>ACADVL</i>   | 609575 |
| Short-chain 3-hydroxyacyl-CoA dehydrogenase deficiency           | Familial hyperinsulinemic hypoglycemia type 4                                                                          | AR  | <i>HADH</i>     | 601609 |
| Trifunctional protein $\alpha$ subunit deficiency                | Long-chain hydroxyacyl-CoA dehydrogenase or complete mitochondrial trifunctional protein deficiency                    | AR  | <i>HADHA</i>    | 600890 |
| Trifunctional protein $\beta$ subunit deficiency                 | Complete mitochondrial trifunctional protein deficiency                                                                | AR  | <i>HADHB</i>    | 143450 |
| Fatty acid transport protein 4 deficiency                        | Ichthyosis prematurity syndrome                                                                                        | AR  | <i>SLC27A4</i>  | 604194 |
| Docosahexanoic acid transporter deficiency                       | Autosomal recessive primary microcephaly type 15                                                                       | AR  | <i>MFS2A</i>    | 614397 |
| TANGO2 deficiency                                                | Metabolic encephalomyopathic crises associated with rhabdomyolysis, cardiac arrhythmias, and neurodegeneration (MECRN) | AR  | <i>TANGO2</i>   | 616830 |
| See also: ACAD9 deficiency in group 59.                          |                                                                                                                        |     |                 |        |
| <b>84. Disorders of ketone body metabolism</b>                   |                                                                                                                        |     |                 |        |
| Mitochondrial 3-hydroxy-3-methylglutaryl-CoA synthase deficiency |                                                                                                                        | AR  | <i>HMGCS2</i>   | 600234 |

|                                                                                |                                                                                        |        |                |        |
|--------------------------------------------------------------------------------|----------------------------------------------------------------------------------------|--------|----------------|--------|
| Succinyl-CoA:3-oxoacid-CoA transferase deficiency                              |                                                                                        | AD, AR | <i>OXCT1</i>   | 601424 |
| Mitochondrial acetoacetyl-CoA thiolase deficiency                              | $\beta$ -ketothiolase deficiency; $\alpha$ -methylacetoacetic aciduria                 | AR     | <i>ACAT1</i>   | 607809 |
| Monocarboxylate transporter 1 deficiency                                       |                                                                                        | AD, AR | <i>SLC16A1</i> | 600682 |
| Monocarboxylate transporter 1 superactivity                                    | Familial hyperinsulinemic hypoglycemia type 7                                          | AD     | <i>SLC16A1</i> | 600682 |
| See also: 3-Hydroxy-3-methylglutaryl-CoA lyase deficiency in group 14.         |                                                                                        |        |                |        |
| <b>85. Disorders of fatty acid synthesis and elongation</b>                    |                                                                                        |        |                |        |
| Mitochondrial enoyl-CoA reductase deficiency                                   | Mitochondrial enoyl-CoA reductase protein-associated neurodegeneration (MEPAN)         | AR     | <i>MECR</i>    | 608205 |
| Very long-chain fatty acid elongase 1 deficiency                               | Ichthyotic keratoderma, spasticity, hypomyelination and dysmorphic features (IKSHD)    | AD     | <i>ELOVL1</i>  | 611813 |
| Very long-chain fatty acid elongase 4 deficiency, neurologic phenotype         | Pseudo-Sjögren-Larsson syndrome (recessive); spinocerebellar ataxia type 34 (dominant) | AD, AR | <i>ELOVL4</i>  | 605512 |
| Very long-chain fatty acid elongase 4 deficiency, retinal phenotype            | Stargardt disease type 3                                                               | AD     | <i>ELOVL4</i>  | 605512 |
| Very long-chain fatty acid elongase 5 deficiency                               | Spinocerebellar ataxia type 38                                                         | AD     | <i>ELOVL5</i>  | 611805 |
| <b>86. Disorder of fatty aldehyde metabolism</b>                               |                                                                                        |        |                |        |
| Fatty aldehyde dehydrogenase deficiency                                        | Sjögren-Larsson syndrome                                                               | AR     | <i>ALDH3A2</i> | 609523 |
| <b>87. Disorders of glycerol metabolism</b>                                    |                                                                                        |        |                |        |
| Glycerol kinase deficiency                                                     |                                                                                        | XLR    | <i>GK</i>      | 300474 |
| Glycerate kinase deficiency                                                    | D-glyceric aciduria                                                                    | AR     | <i>GLYCTK</i>  | 610516 |
| Aquaporin 7 deficiency                                                         | Hyperglyceroluria with mild platelet secretion defect                                  | AR     | <i>AQP7</i>    | 602974 |
| See also: Cytosolic glycerol-3-phosphate dehydrogenase deficiency in group 57. |                                                                                        |        |                |        |
| <b>88. Disorders of cytoplasmic triglyceride metabolism</b>                    |                                                                                        |        |                |        |
| Long-chain fatty acid-CoA ligase 4 deficiency                                  | X-linked mental retardation 63                                                         | XL     | <i>ACSL4</i>   | 300157 |
| Lysophosphatidic acid acyltransferase deficiency                               | Congenital generalized lipodystrophy type 1, Berardinelli-Seip syndrome                | AR     | <i>AGPAT2</i>  | 603100 |
| Lipin 1 deficiency                                                             |                                                                                        | AR     | <i>LPIN1</i>   | 605518 |
| Lipin 2 deficiency                                                             | Majeed syndrome                                                                        | AR     | <i>LPIN2</i>   | 605519 |
| Diacylglycerol acyltransferase deficiency                                      | Congenital diarrhea type 7                                                             | AR     | <i>DGAT1</i>   | 604900 |

|                                                                                   |                                                                                                                               |    |                |        |
|-----------------------------------------------------------------------------------|-------------------------------------------------------------------------------------------------------------------------------|----|----------------|--------|
| CGI-58 deficiency                                                                 | Chanarin-Dorfman syndrome; neutral lipid storage disease with ichthyosis                                                      | AR | <i>ABHD5</i>   | 604780 |
| Adipose triglyceride lipase deficiency                                            | Neutral lipid storage disease with myopathy                                                                                   | AR | <i>PNPLA2</i>  | 609059 |
| Perilipin 1 deficiency                                                            | Familial partial lipodystrophy type 4                                                                                         | AD | <i>PLIN1</i>   | 170290 |
| Hormone-sensitive lipase deficiency                                               | Familial partial lipodystrophy type 6                                                                                         | AR | <i>LIPE</i>    | 151750 |
| <b>89. Disorders of non-mitochondrial phospholipid metabolism</b>                 |                                                                                                                               |    |                |        |
| Choline kinase $\beta$ deficiency                                                 | Congenital muscular dystrophy, megaconial type                                                                                | AR | <i>CHKB</i>    | 612395 |
| Phosphocholine cytidyltransferase 1 $\alpha$ deficiency, retinoskeletal phenotype |                                                                                                                               | AR | <i>PCYT1A</i>  | 123695 |
| Phosphocholine cytidyltransferase 1 $\alpha$ deficiency, lipodystrophy phenotype  |                                                                                                                               | AR | <i>PCYT1A</i>  | 123695 |
| Phosphatidylserine synthase 1 superactivity                                       | Lenz-Majewski syndrome                                                                                                        | AD | <i>PTDSS1</i>  | 612792 |
| Phospholipase A2 group 6 deficiency                                               | Infantile neuroaxonal dystrophy; Seitelberger disease; neurodegeneration with brain iron accumulation type 2B                 | AR | <i>PLA2G6</i>  | 603604 |
| DDHD1 deficiency                                                                  | Autosomal recessive spastic paraplegia type 28                                                                                | AR | <i>DDHD1</i>   | 614603 |
| DDHD2 deficiency                                                                  | Autosomal recessive spastic paraplegia type 54                                                                                | AR | <i>DDHD2</i>   | 615003 |
| PNPLA6 deficiency                                                                 | Autosomal recessive spastic paraplegia type 39; Oliver-McFarlane syndrome; Boucher-Neuhauser syndrome; Laurence-Moon syndrome | AR | <i>PNPLA6</i>  | 603197 |
| CYP2U1 deficiency                                                                 | Autosomal recessive spastic paraplegia type 56                                                                                | AR | <i>CYP2U1</i>  | 610670 |
| ABHD12 deficiency                                                                 | Polyneuropathy, hearing loss, ataxia, retinitis pigmentosa, and cataract (PHARC) syndrome,                                    | AR | <i>ABHD12</i>  | 613599 |
| Diacylglycerol kinase $\epsilon$ deficiency                                       | Nephrotic syndrome type 7; atypical hemolytic uremic syndrome type 7                                                          | AR | <i>DGKE</i>    | 601440 |
| See also: Lipin 1 and lipin 2 deficiencies in group 88.                           |                                                                                                                               |    |                |        |
| <b>90. Disorders of non-lysosomal sphingolipid metabolism</b>                     |                                                                                                                               |    |                |        |
| Serine palmitoyltransferase subunit 1 deficiency                                  | Hereditary sensory and autonomic neuropathy type 1A                                                                           | AD | <i>SPTLC1</i>  | 605712 |
| Serine palmitoyltransferase subunit 2 deficiency                                  | Hereditary sensory and autonomic neuropathy type 1C                                                                           | AD | <i>SPTLC2</i>  | 605713 |
| Ceramide synthase 3 deficiency                                                    | Autosomal recessive congenital ichthyosis type 9                                                                              | AR | <i>CERS3</i>   | 615276 |
| CYP4F22 omega hydroxylase deficiency                                              | Autosomal recessive congenital ichthyosis type 5                                                                              | AR | <i>CYP4F22</i> | 611495 |

|                                                                                         |                                                                                                            |        |                 |        |
|-----------------------------------------------------------------------------------------|------------------------------------------------------------------------------------------------------------|--------|-----------------|--------|
| Nonlysosomal glucosylceramidase deficiency                                              | Autosomal recessive spastic paraplegia type 46                                                             | AR     | <i>GBA2</i>     | 609471 |
| Fatty acid 2-hydroxylase deficiency                                                     | Autosomal recessive spastic paraplegia type 35; fatty acid hydroxylase-associated neurodegeneration (FAHN) | AR     | <i>FA2H</i>     | 611026 |
| Sphingosine-1-phosphate lyase deficiency                                                |                                                                                                            | AR     | <i>SGPL1</i>    | 603729 |
| Ceramide transfer protein superactivity                                                 | Autosomal dominant mental retardation type 34                                                              | AD     | <i>COL4A3BP</i> | 604677 |
| See also: GM3 synthase, GM2/GD2 synthase, and GB3 synthase deficiencies in group 123.   |                                                                                                            |        |                 |        |
| <b>91. Disorders of eicosanoid metabolism</b>                                           |                                                                                                            |        |                 |        |
| Thromboxane synthase deficiency                                                         | Ghosal hematodiaphyseal syndrome                                                                           | AR     | <i>TBXAS1</i>   | 274180 |
| 15-hydroxy prostaglandin dehydrogenase deficiency                                       | Primary hypertrophic osteoarthropathy type 1                                                               | AR     | <i>HPGD</i>     | 601688 |
| Prostaglandin transporter deficiency                                                    | Primary hypertrophic osteoarthropathy type 2                                                               | AR     | <i>SLCO2A1</i>  | 601460 |
| <b>92. Disorders of palmitoylation</b>                                                  |                                                                                                            |        |                 |        |
| ZDHHC9 palmitoyltransferase deficiency                                                  | X-linked mental retardation, Raymond type                                                                  | XLR    | <i>ZDHHC9</i>   | 300646 |
| Porcupine palmitoyltransferase deficiency                                               | Goltz syndrome, focal dermal hypoplasia                                                                    | XLD    | <i>PORCN</i>    | 300651 |
| Palmitoyl-protein thioesterase 1 deficiency                                             | Neuronal ceroid lipofuscinosis type 1; Santavuori-Haltia disease                                           | AR     | <i>PPT1</i>     | 600722 |
| <b>93. Disorders of phosphoinositide metabolism</b>                                     |                                                                                                            |        |                 |        |
| Phosphatidylinositol 3,5-bisphosphate-5-phosphatase deficiency, neurologic phenotype    | Amyotrophic lateral sclerosis type 11 (dominant); Charcot-Marie-Tooth disease type 4J (recessive)          | AD, AR | <i>FIG4</i>     | 609390 |
| Phosphatidylinositol 3,5-bisphosphate-5-phosphatase deficiency, neuroskeletal phenotype | Yunis-Varon syndrome                                                                                       | AR     | <i>FIG4</i>     | 609390 |
| Phosphatidylinositol 4,5-bisphosphate-5-phosphatase deficiency                          | Lowe syndrome, Dent disease type 2                                                                         | XLR    | <i>OCRL</i>     | 300535 |
| Synaptojanin 1 deficiency                                                               | Early infantile epileptic encephalopathy type 53; early-onset Parkinson disease type 20                    | AR     | <i>SYNJ1</i>    | 604297 |
| Myotubularin 1 deficiency                                                               | X-linked myotubular myopathy                                                                               | XLR    | <i>MTM1</i>     | 300415 |
| Myotubularin-related protein 2 deficiency                                               | Charcot-Marie-Tooth disease type 4B1                                                                       | AR     | <i>MTMR2</i>    | 603557 |
| Myotubularin-related protein 2 regulatory protein deficiency                            | Charcot-Marie-Tooth disease type 4B2                                                                       | AR     | <i>SBF2</i>     | 607697 |

|                                                                               |                                                                                                                                             |             |                |        |
|-------------------------------------------------------------------------------|---------------------------------------------------------------------------------------------------------------------------------------------|-------------|----------------|--------|
| Myotubularin-related protein 2 activator deficiency                           | Charcot-Marie-Tooth disease type 4B3                                                                                                        | AR          | <i>SBF1</i>    | 603560 |
| Catalytic phosphatidylinositol 3-kinase $\alpha$ subunit superactivity        |                                                                                                                                             | AD, somatic | <i>PIK3CA</i>  | 171834 |
| Catalytic phosphatidylinositol 3-kinase $\delta$ subunit superactivity        | Immunodeficiency type 14                                                                                                                    | AD          | <i>PIK3CD</i>  | 602839 |
| Phosphatidylinositol 3-kinase regulatory subunit 1 deficiency                 | SHORT syndrome, immunodeficiency type 36                                                                                                    | AD          | <i>PIK3R1</i>  | 171833 |
| Phosphatidylinositol 3-kinase regulatory subunit 2 superactivity              | Megalencephaly-polymicrogyria-polydactyly-hydrocephalus syndrome type 1                                                                     | AD          | <i>PIK3R2</i>  | 603157 |
| Phosphatidylinositol-3-phosphate 5-kinase deficiency                          | Corneal fleck dystrophy                                                                                                                     | AD          | <i>PIKFYVE</i> | 609414 |
| Phosphatidylinositol 4-phosphate 5-kinase deficiency                          | Lethal congenital contractural syndrome type 3                                                                                              | AR          | <i>PIP5K1C</i> | 606102 |
| Phosphatidylinositol 3,4,5-trisphosphate 3-phosphatase deficiency             | PTEN hamartoma tumor syndrome                                                                                                               | AD          | <i>PTEN</i>    | 601728 |
| Phosphatidylinositol 3,4,5-trisphosphate 5-phosphatase deficiency             | Opsismodysplasia                                                                                                                            | AR          | <i>INPP1L</i>  | 600829 |
| Inositol polyphosphate 5-phosphatase deficiency                               | Joubert syndrome type 1                                                                                                                     | AR          | <i>INPP5E</i>  | 613037 |
| Phosphatidylinositol 4,5-bisphosphate phospholipase C $\beta$ 1 deficiency    | Early infantile epileptic encephalopathy type 12                                                                                            | AR          | <i>PLCB1</i>   | 607120 |
| Phosphatidylinositol 4,5-bisphosphate phospholipase C $\beta$ 4 deficiency    | Auriculocondylar syndrome type 2                                                                                                            | AD, AR      | <i>PLCB4</i>   | 600810 |
| Phosphatidylinositol 4,5-bisphosphate phospholipase C $\gamma$ 2 deficiency   | Autoinflammation and PLCG2-associated antibody deficiency and immune dysregulation (APLAID); familial cold autoinflammatory syndrome type 3 | AD          | <i>PLCG2</i>   | 600220 |
| Phosphatidylinositol 4,5-bisphosphate phospholipase C $\delta$ 1 deficiency   | Nonsyndromic congenital nail disorder type 3; leukonychia totalis and/or partialis                                                          | AD, AR      | <i>PLCD1</i>   | 602142 |
| Phosphatidylinositol 4,5-bisphosphate phospholipase C $\epsilon$ 1 deficiency | Nephrotic syndrome type 3                                                                                                                   | AR          | <i>PLCE1</i>   | 608414 |
| Inositol 1,4,5-triphosphate receptor type 1 deficiency                        | Gillespie syndrome; congenital non-progressive cerebellar ataxia; spinocerebellar ataxia type 15                                            | AD, AR      | <i>ITPR1</i>   | 147265 |
| <b>94. Disorders of lipoprotein metabolism</b>                                |                                                                                                                                             |             |                |        |
| LDL receptor deficiency                                                       | Familial hypercholesterolemia                                                                                                               | AD, AR      | <i>LDLR</i>    | 606945 |

|                                                     |                                                                                       |    |                |        |
|-----------------------------------------------------|---------------------------------------------------------------------------------------|----|----------------|--------|
| LDL receptor adaptor protein 1 deficiency           |                                                                                       | AR | <i>LDLRAP1</i> | 605747 |
| Hypercholesterolemia due to ligand-defective apo B  |                                                                                       | AD | <i>APOB</i>    | 107730 |
| Apolipoprotein B deficiency                         | Familial hypobetalipoproteinemia type 1; normotriglyceridemic hypobetalipoproteinemia | AR | <i>APOB</i>    | 107730 |
| PCSK9 superactivity                                 | Familial hypercholesterolemia type 3                                                  | AD | <i>PCSK9</i>   | 607786 |
| PCSK9 deficiency                                    |                                                                                       | AD | <i>PCSK9</i>   | 607786 |
| STAP1 deficiency                                    | Familial hypercholesterolemia type 4                                                  | AD | <i>STAP1</i>   | 604298 |
| Sitosterolemia due to ABCG5 deficiency              |                                                                                       | AR | <i>ABCG5</i>   | 605459 |
| Sitosterolemia due to ABCG8 deficiency              |                                                                                       | AR | <i>ABCG8</i>   | 605460 |
| Angiopoietin-like 3 deficiency                      | Familial hypobetalipoproteinemia type 2; combined familial hypolipidemia              | AR | <i>ANGPTL3</i> | 604774 |
| Microsomal triglyceride transfer protein deficiency | Abetalipoproteinemia                                                                  | AR | <i>MTTP</i>    | 157147 |
| Chylomicron retention disease                       | Anderson disease                                                                      | AR | <i>SAR1B</i>   | 607690 |
| Apolipoprotein E deficiency                         | Dysbetalipoproteinemia; hyperlipoproteinemia type 3                                   | AR | <i>APOE</i>    | 107741 |
| Apolipoprotein E superactivity                      | Inherited lipemic splenomegaly; sea-blue histiocytosis                                | AD | <i>APOE</i>    | 107741 |
| Lipoprotein glomerulopathy                          |                                                                                       | AD | <i>APOE</i>    | 107741 |
| Lipoprotein lipase deficiency                       | Hyperlipoproteinemia type 1A                                                          | AR | <i>LPL</i>     | 609708 |
| Apolipoprotein C2 deficiency                        | Hyperlipoproteinemia type 1B                                                          | AR | <i>APOC2</i>   | 608083 |
| GPIHBP1 deficiency                                  | Hyperlipoproteinemia type 1D                                                          | AR | <i>GPIHBP1</i> | 612757 |
| Hepatic lipase deficiency                           |                                                                                       | AR | <i>LIPC</i>    | 151670 |
| Lipase maturation factor 1 deficiency               | Combined lipase deficiency                                                            | AR | <i>LMF1</i>    | 611761 |
| Apolipoprotein A5 deficiency                        | Late-onset hyperchylomicronemia; hyperlipoproteinemia type 5                          | AD | <i>APOA5</i>   | 606368 |
| Lecithin:cholesterol acyltransferase deficiency     | Norum disease (severe); fish-eye disease (milder)                                     | AR | <i>LCAT</i>    | 606967 |
| Tangier disease                                     | Analaphalipoproteinemia                                                               | AR | <i>ABCA1</i>   | 600046 |
| Apolipoprotein A1 deficiency                        | Hypoalaphalipoproteinemia                                                             | AD | <i>APOA1</i>   | 107680 |
| Hereditary apolipoprotein A1-related amyloidosis    |                                                                                       | AD | <i>APOA1</i>   | 107680 |
| Cholesteryl ester transfer protein deficiency       | Hyperalaphalipoproteinemia type 1                                                     | AD | <i>CETP</i>    | 118470 |

|                                                                          |                                                                                                                           |        |                |        |
|--------------------------------------------------------------------------|---------------------------------------------------------------------------------------------------------------------------|--------|----------------|--------|
| Apolipoprotein C3 deficiency                                             | Hyperalphalipoproteinemia type 2                                                                                          | AD     | <i>APOC3</i>   | 107720 |
| <b>95. Disorders of cholesterol biosynthesis</b>                         |                                                                                                                           |        |                |        |
| Mevalonate kinase deficiency                                             | Mevalonic aciduria (severe); hyper-IgD syndrome (milder)                                                                  | AR     | <i>MVK</i>     | 251170 |
| Mevalonate kinase deficiency, porokeratosis phenotype                    | Porokeratosis type 3                                                                                                      | AD     | <i>MVK</i>     | 251170 |
| Phosphomevalonate kinase deficiency                                      | Porokeratosis type 1                                                                                                      | AD     | <i>PMVK</i>    | 607622 |
| Mevalonate pyrophosphate decarboxylase deficiency                        | Porokeratosis type 7                                                                                                      | AD     | <i>MVD</i>     | 603236 |
| Farnesyl diphosphate synthase deficiency                                 | Porokeratosis type 9                                                                                                      | AD     | <i>FDPS</i>    | 134629 |
| Sterol C14 reductase deficiency                                          | Hydrops-ectopic calcification-moth-eaten (HEM) dysplasia, Greenberg dysplasia (recessive); Pelger-Huët anomaly (dominant) | AD, AR | <i>LBR</i>     | 600024 |
| Sterol-C4-methyl oxidase deficiency                                      | Microcephaly, congenital cataract, and psoriasiform dermatitis                                                            | AR     | <i>MSMO1</i>   | 607545 |
| X-linked dominant sterol-4-alpha-carboxylate 3-dehydrogenase deficiency  | Congenital hemidysplasia with ichthyosiform erythroderma and limb defects (CHILD) syndrome                                | XLD    | <i>NSDHL</i>   | 300275 |
| X-linked recessive sterol-4-alpha-carboxylate 3-dehydrogenase deficiency | CK syndrome                                                                                                               | XLR    | <i>NSDHL</i>   | 300275 |
| X-linked dominant sterol $\Delta 8$ - $\Delta 7$ isomerase deficiency    | X-linked dominant chondrodysplasia punctata type 2; Conradi-Hünemann-Happle syndrome                                      | XLD    | <i>EBP</i>     | 300205 |
| X-linked recessive sterol $\Delta 8$ - $\Delta 7$ isomerase deficiency   | Male EBP disorder with neurologic defects (MEND syndrome)                                                                 | XLR    | <i>EBP</i>     | 300205 |
| Sterol $\Delta 5$ -desaturase deficiency                                 | Lathosterolosis                                                                                                           | AR     | <i>SC5D</i>    | 602286 |
| 24-dehydrocholesterol reductase deficiency                               | Desmosterolosis                                                                                                           | AR     | <i>DHCR24</i>  | 606418 |
| 7-dehydrocholesterol reductase deficiency                                | Smith-Lemli-Opitz syndrome; RSH syndrome                                                                                  | AR     | <i>DHCR7</i>   | 602858 |
| <b>96. Disorders of steroid metabolism</b>                               |                                                                                                                           |        |                |        |
| 21-hydroxylase deficiency                                                |                                                                                                                           | AR     | <i>CYP21A2</i> | 613815 |
| 11- $\beta$ -hydroxylase deficiency                                      |                                                                                                                           | AR     | <i>CYP11B1</i> | 610613 |
| 11- $\beta$ -hydroxylase superactivity                                   | Glucocorticoid remediable aldosteronism                                                                                   | AD     | <i>CYP11B1</i> | 610613 |
| 3- $\beta$ -hydroxysteroid dehydrogenase deficiency                      |                                                                                                                           | AR     | <i>HSD3B2</i>  | 613890 |
| 17-hydroxylase/17,20-lyase deficiency                                    |                                                                                                                           | AR     | <i>CYP17A1</i> | 609300 |



|                                                                      |                                                                                   |     |                |        |
|----------------------------------------------------------------------|-----------------------------------------------------------------------------------|-----|----------------|--------|
| Steroidogenic acute regulatory protein deficiency                    | Lipoid adrenal hyperplasia                                                        | AR  | <i>STAR</i>    | 600617 |
| Cytochrome P450 oxidoreductase deficiency                            |                                                                                   | AR  | <i>POR</i>     | 124015 |
| Steroid 18-hydroxylase deficiency                                    | Aldosterone synthase deficiency; corticosterone methyloxidase type 1 deficiency   | AR  | <i>CYP11B2</i> | 124080 |
| Steroid 18-oxidase deficiency                                        | Corticosterone methyloxidase type 2 deficiency                                    | AR  | <i>CYP11B2</i> | 124080 |
| Hexose-6-phosphate dehydrogenase deficiency                          | Cortisone reductase deficiency type 1                                             | AR  | <i>H6PD</i>    | 138090 |
| 11- $\beta$ -hydroxysteroid dehydrogenase deficiency                 | Cortisone reductase deficiency type 2                                             | AD  | <i>HSD11B1</i> | 600713 |
| Glucocorticoid receptor deficiency                                   | Glucocorticoid resistance                                                         | AD  | <i>NR3C1</i>   | 138040 |
| ACTH receptor deficiency                                             | Melanocortin-2 receptor deficiency; hereditary glucocorticoid deficiency type 1   | AR  | <i>MC2R</i>    | 607397 |
| Melanocortin-2 receptor accessory protein deficiency                 | Hereditary glucocorticoid deficiency type 2                                       | AR  | <i>MRAP</i>    | 609196 |
| Aromatase deficiency                                                 |                                                                                   | AR  | <i>CYP19A1</i> | 107910 |
| Aromatase superactivity                                              |                                                                                   | AD  | <i>CYP19A1</i> | 107910 |
| Estrogen receptor deficiency                                         | Estrogen resistance                                                               | AR  | <i>ESR1</i>    | 133430 |
| Side-chain cleavage enzyme deficiency                                | Desmolase deficiency                                                              | AR  | <i>CYP11A1</i> | 118485 |
| 17- $\beta$ -hydroxysteroid dehydrogenase deficiency                 | 17-ketosteroid reductase deficiency; male pseudohermaphroditism with gynecomastia | AR  | <i>HSD17B3</i> | 605573 |
| 3- $\alpha$ -hydroxysteroid dehydrogenase type 3 deficiency          |                                                                                   | AR  | <i>AKR1C2</i>  | 600450 |
| 11- $\beta$ -hydroxysteroid dehydrogenase type 2 deficiency          | Apparent mineralocorticoid excess                                                 | AR  | <i>HSD11B2</i> | 614232 |
| Steroid 5- $\alpha$ -reductase 2 deficiency                          |                                                                                   | AR  | <i>SRD5A2</i>  | 607306 |
| Androgen receptor deficiency                                         | Androgen insensitivity syndrome                                                   | XLR | <i>AR</i>      | 313700 |
| X-linked spinal and bulbar muscular atrophy                          | Kennedy disease                                                                   | XLR | <i>AR</i>      | 313700 |
| Steroid sulfatase deficiency                                         | X-linked ichthyosis                                                               | XLR | <i>STS</i>     | 300747 |
| See also: Cytochrome b5 deficiency in group 98.                      |                                                                                   |     |                |        |
| <b>97. Disorders of bile acid synthesis</b>                          |                                                                                   |     |                |        |
| 3 $\beta$ -Hydroxy- $\Delta$ 5-C27-steroid oxidoreductase deficiency | Congenital bile acid synthesis defect type 1                                      | AR  | <i>HSD3B7</i>  | 607764 |

|                                                                    |                                                                                                 |        |                |        |
|--------------------------------------------------------------------|-------------------------------------------------------------------------------------------------|--------|----------------|--------|
| Δ4-3-oxosteroid 5β-reductase deficiency                            | Congenital bile acid synthesis defect type 2                                                    | AR     | <i>AKR1D1</i>  | 604741 |
| Oxysterol 7α-hydroxylase deficiency                                | Congenital bile acid synthesis defect type 3;<br>autosomal recessive spastic paraplegia type 5A | AR     | <i>CYP7B1</i>  | 603711 |
| Sterol 27-hydroxylase deficiency                                   | Cerebrotendinous xanthomatosis                                                                  | AR     | <i>CYP27A1</i> | 606530 |
| α-methylacyl-CoA racemase deficiency                               | Congenital bile acid synthesis defect type 4                                                    | AR     | <i>AMACR</i>   | 604489 |
| Peroxisomal branched-chain acyl-CoA oxidase deficiency             | Congenital bile acid synthesis defect type 6                                                    | AR     | <i>ACOX2</i>   | 601641 |
| Bile acid-CoA:amino acid N-acyltransferase deficiency              |                                                                                                 | AR     | <i>BAAT</i>    | 602938 |
| <b>F. DISORDERS OF TETRAPYRROLES</b>                               |                                                                                                 |        |                |        |
| <b>98. Disorders of heme metabolism</b>                            |                                                                                                 |        |                |        |
| δ-aminolevulinic acid synthase deficiency                          | X-linked recessive sideroblastic anemia type 1                                                  | XLR    | <i>ALAS2</i>   | 301300 |
| δ-aminolevulinic acid synthase superactivity                       | X-linked protoporphyria                                                                         | XLD    | <i>ALAS2</i>   | 301300 |
| δ-aminolevulinic acid dehydratase deficiency                       |                                                                                                 | AR     | <i>ALAD</i>    | 125270 |
| Porphobilinogen deaminase deficiency                               | Acute intermittent porphyria                                                                    | AD, AR | <i>HMBS</i>    | 609806 |
| Uroporphyrinogen III synthase deficiency                           | Congenital erythropoietic porphyria; Gunther disease                                            | AR     | <i>UROS</i>    | 606938 |
| Uroporphyrinogen decarboxylase deficiency                          | Porphyria cutanea tarda type 2 (dominant);<br>hepatoerythropoietic porphyria (recessive)        | AD, AR | <i>UROD</i>    | 613521 |
| Coproporphyrinogen oxidase deficiency                              | Hereditary coproporphyria                                                                       | AD     | <i>CPOX</i>    | 612732 |
| Harderoporphyria                                                   |                                                                                                 | AR     | <i>CPOX</i>    | 612732 |
| Protoporphyrinogen oxidase deficiency                              | Variegate porphyria                                                                             | AD, AR | <i>PPOX</i>    | 600923 |
| Ferrochelatase deficiency                                          | Erythropoietic protoporphyria                                                                   | AR     | <i>FECH</i>    | 612386 |
| GATA1 deficiency                                                   |                                                                                                 | XLR    | <i>GATA1</i>   | 305371 |
| Mitochondrial porphyrin transporter deficiency                     | Familial pseudohyperkalemia type 2; dyschromatosis universalis hereditaria type 3               | AD     | <i>ABCB6</i>   | 605452 |
| NADH-cytochrome b5 reductase deficiency                            | NADH diaphorase deficiency                                                                      | AR     | <i>CYB5R3</i>  | 613213 |
| Cytochrome b5 deficiency                                           |                                                                                                 | AR     | <i>CYB5A</i>   | 613218 |
| Heme oxygenase 1 deficiency                                        |                                                                                                 | AR     | <i>HMOX1</i>   | 141250 |
| Biliverdin reductase α deficiency                                  | Hyperbiliverdinemia                                                                             | AD, AR | <i>BLVRA</i>   | 109750 |
| <b>99. Disorders of bilirubin metabolism and biliary transport</b> |                                                                                                 |        |                |        |
| UDP-glucuronosyltransferase A1 deficiency                          | Crigler-Najjar syndrome (severe); Gilbert syndrome (milder)                                     | AR     | <i>UGT1A1</i>  | 191740 |

|                                                                 |                                                                                                                                                                                                       |         |                          |                 |
|-----------------------------------------------------------------|-------------------------------------------------------------------------------------------------------------------------------------------------------------------------------------------------------|---------|--------------------------|-----------------|
| Canalicular bilirubin glucuronide transporter deficiency        | Dubin-Johnson syndrome                                                                                                                                                                                | AR      | <i>ABCC2</i>             | 601107          |
| Rotor syndrome                                                  |                                                                                                                                                                                                       | Digenic | <i>SLC01B1 + SLC01B3</i> | 604843 + 605495 |
| Phosphatidylserine translocator deficiency                      | Progressive familial intrahepatic cholestasis type 1 (severe); benign recurrent intrahepatic cholestasis type 1 (milder)                                                                              | AR      | <i>ATP8B1</i>            | 602397          |
| Bile salt export pump deficiency                                | Progressive familial intrahepatic cholestasis type 2 (severe); benign recurrent intrahepatic cholestasis type 2 (milder)                                                                              | AR      | <i>ABCB11</i>            | 603201          |
| Phosphatidylcholine translocator deficiency                     | Progressive familial intrahepatic cholestasis type 3 (severe); low phospholipid-associated cholelithiasis (milder)                                                                                    | AD, AR  | <i>ABCB4</i>             | 171060          |
| Bile acid receptor deficiency                                   | Progressive familial intrahepatic cholestasis type 5                                                                                                                                                  | AR      | <i>NR1H4</i>             | 603826          |
| Apical bile salt transporter deficiency                         | Primary bile acid malabsorption                                                                                                                                                                       | AR      | <i>SLC10A2</i>           | 601295          |
| See also: Disorders of cobalamin metabolism (group 26).         |                                                                                                                                                                                                       |         |                          |                 |
| <b>G. STORAGE DISORDERS</b>                                     |                                                                                                                                                                                                       |         |                          |                 |
| <b>100. Disorders of autophagy</b>                              |                                                                                                                                                                                                       |         |                          |                 |
| EPG5 deficiency                                                 | Vici syndrome                                                                                                                                                                                         | AR      | <i>EPG5</i>              | 615068          |
| WDR45 deficiency                                                | Neurodegeneration with brain iron accumulation type 5; static encephalopathy of childhood with neurodegeneration in adulthood (SENDA); $\beta$ -propeller protein-associated neurodegeneration (BPAN) | XLD     | <i>WDR45</i>             | 300526          |
| SNX14 deficiency                                                | Autosomal recessive spinocerebellar ataxia type 20                                                                                                                                                    | AR      | <i>SNX14</i>             | 616105          |
| Spatacsin deficiency                                            | Autosomal recessive spastic paraplegia type 11; axonal Charcot-Marie-Tooth disease type 2X; juvenile amyotrophic lateral sclerosis type 5                                                             | AR      | <i>SPG11</i>             | 610844          |
| Spastizin deficiency                                            | Autosomal recessive spastic paraplegia type 15; Kjellin syndrome                                                                                                                                      | AR      | <i>ZFYVE26</i>           | 612012          |
| Adaptor-related protein complex 5 $\zeta$ -1 subunit deficiency | Autosomal recessive spastic paraplegia type 48                                                                                                                                                        | AR      | <i>AP5Z1</i>             | 613653          |
| TECPR2 deficiency                                               | Autosomal recessive spastic paraplegia type 49                                                                                                                                                        | AR      | <i>TECPR2</i>            | 615000          |
| TBK1 deficiency                                                 | Frontotemporal dementia and/or amyotrophic lateral sclerosis type 4                                                                                                                                   | AD      | <i>TBK1</i>              | 604834          |

|                                                                    |                                                                                                                                        |        |                |        |
|--------------------------------------------------------------------|----------------------------------------------------------------------------------------------------------------------------------------|--------|----------------|--------|
| RAB7 deficiency                                                    | Charcot-Marie-Tooth disease type 2B                                                                                                    | AD     | <i>RAB7A</i>   | 602298 |
| <b>101. Neuronal ceroid lipofuscinosis</b>                         |                                                                                                                                        |        |                |        |
| Tripeptidyl-peptidase 1 deficiency                                 | Neuronal ceroid lipofuscinosis type 2, Jansky-Bielchowsky disease (severe), autosomal recessive spinocerebellar ataxia type 7 (milder) | AR     | <i>TPP1</i>    | 607998 |
| Neuronal ceroid lipofuscinosis type 3                              | Vogt-Spielmeyer disease                                                                                                                | AR     | <i>CLN3</i>    | 607042 |
| Neuronal ceroid lipofuscinosis type 4 (Parry type)                 | Autosomal dominant Kufs disease                                                                                                        | AD     | <i>DNAJC5</i>  | 611203 |
| Neuronal ceroid lipofuscinosis type 5                              |                                                                                                                                        | AR     | <i>CLN5</i>    | 608102 |
| Neuronal ceroid lipofuscinosis type 6                              | Autosomal recessive Kufs disease type A                                                                                                | AR     | <i>CLN6</i>    | 606725 |
| Neuronal ceroid lipofuscinosis type 7                              | Macular dystrophy with central cone involvement (milder)                                                                               | AR     | <i>MFSD8</i>   | 611124 |
| Neuronal ceroid lipofuscinosis type 8                              |                                                                                                                                        | AR     | <i>CLN8</i>    | 607837 |
| Cathepsin D deficiency                                             | Neuronal ceroid lipofuscinosis type 10                                                                                                 | AR     | <i>CTSD</i>    | 116840 |
| Progranulin deficiency                                             | Frontotemporal lobar degeneration with TDP-43 inclusions (dominant); neuronal ceroid lipofuscinosis type 11 (recessive)                | AD, AR | <i>GRN</i>     | 138945 |
| ATP13A2 deficiency                                                 | Neuronal ceroid lipofuscinosis type 12; Kufor-Rakeb syndrome; Parkinson disease type 9; autosomal recessive spastic paraplegia type 78 | AR     | <i>ATP13A2</i> | 610513 |
| Cathepsin F deficiency                                             | Autosomal recessive Kufs disease type B                                                                                                | AR     | <i>CTSF</i>    | 603539 |
| Neuronal ceroid lipofuscinosis type 14                             | Progressive myoclonic epilepsy type 3                                                                                                  | AR     | <i>KCTD7</i>   | 611725 |
| See also: Palmitoyl-protein thioesterase 1 deficiency in group 92. |                                                                                                                                        |        |                |        |
| <b>102. Sphingolipidoses</b>                                       |                                                                                                                                        |        |                |        |
| Glucoocerebrosidase deficiency                                     | Gaucher disease                                                                                                                        | AR     | <i>GBA</i>     | 606463 |
| Atypical Gaucher disease due to saposin C deficiency               |                                                                                                                                        | AR     | <i>PSAP</i>    | 176801 |
| Acid sphingomyelinase deficiency                                   | Niemann-Pick type A (severe); Niemann-Pick type B (milder)                                                                             | AR     | <i>SMPD1</i>   | 607608 |
| $\beta$ -galactosidase deficiency, GM1 gangliosidosis phenotype    |                                                                                                                                        | AR     | <i>GLB1</i>    | 611458 |
| $\beta$ -hexosaminidase $\alpha$ -subunit deficiency               | GM2 gangliosidosis, B variant (Tay-Sachs disease)                                                                                      | AR     | <i>HEXA</i>    | 606869 |
| $\beta$ -hexosaminidase $\beta$ -subunit deficiency                | GM2 gangliosidosis, O variant (Sandhoff disease)                                                                                       | AR     | <i>HEXB</i>    | 606873 |
| GM2 activator protein deficiency                                   | GM2 gangliosidosis, AB variant                                                                                                         | AR     | <i>GM2A</i>    | 613109 |
| $\beta$ -galactosylceramidase deficiency                           | Globoid cell leukodystrophy; Krabbe disease                                                                                            | AR     | <i>GALC</i>    | 245200 |

|                                                                                |                                                                                                                           |     |               |        |
|--------------------------------------------------------------------------------|---------------------------------------------------------------------------------------------------------------------------|-----|---------------|--------|
| Atypical Krabbe disease due to saposin A deficiency                            |                                                                                                                           | AR  | <i>PSAP</i>   | 176801 |
| Arylsulfatase A deficiency                                                     | Metachromatic leukodystrophy                                                                                              | AR  | <i>ARSA</i>   | 607574 |
| Metachromatic leukodystrophy due to saposin B deficiency                       |                                                                                                                           | AR  | <i>PSAP</i>   | 176801 |
| Formyl-glycine generating enzyme deficiency                                    | Multiple sulfatase deficiency                                                                                             | AR  | <i>SUMF1</i>  | 607939 |
| $\alpha$ -Galactosidase A deficiency                                           | Fabry disease                                                                                                             | XL  | <i>GLA</i>    | 300644 |
| Acid ceramidase deficiency, inflammatory phenotype                             | Farber disease                                                                                                            | AR  | <i>ASAH1</i>  | 613468 |
| Acid ceramidase deficiency, primary neurologic phenotype                       | Spinal muscular atrophy with progressive myoclonic epilepsy                                                               | AR  | <i>ASAH1</i>  | 613468 |
| Combined saposin deficiency                                                    | Prosaposin deficiency                                                                                                     | AR  | <i>PSAP</i>   | 176801 |
| <b>103. Oligosaccharidoses</b>                                                 |                                                                                                                           |     |               |        |
| $\alpha$ -neuraminidase deficiency                                             | Sialidosis                                                                                                                | AR  | <i>NEU1</i>   | 608272 |
| Cathepsin A deficiency                                                         | Galactosialidosis                                                                                                         | AR  | <i>CTSA</i>   | 613111 |
| $\alpha$ -mannosidase deficiency                                               | $\alpha$ -mannosidosis                                                                                                    | AR  | <i>MAN2B1</i> | 609458 |
| $\beta$ -mannosidase deficiency                                                | $\beta$ -mannosidosis                                                                                                     | AR  | <i>MANBA</i>  | 609489 |
| $\alpha$ -N-acetylgalactosaminidase deficiency                                 | Schindler disease; Kanzaki disease (milder)                                                                               | AR  | <i>NAGA</i>   | 104170 |
| $\alpha$ -fucosidase deficiency                                                | $\alpha$ -fucosidosis                                                                                                     | AR  | <i>FUCA1</i>  | 612280 |
| Aspartylglucosaminidase deficiency                                             | Aspartylglucosaminuria                                                                                                    | AR  | <i>AGA</i>    | 613228 |
| <b>104. Mucopolidoses</b>                                                      |                                                                                                                           |     |               |        |
| UDP-N-acetylglucosamine-1-phosphotransferase $\alpha/\beta$ subunit deficiency | Mucopolidosis type 2, I-cell disease (severe); mucopolidosis type 3 $\alpha/\beta$ , pseudo-Hurler polydystrophy (milder) | AR  | <i>GNPTAB</i> | 607840 |
| UDP-N-acetylglucosamine-1-phosphotransferase $\gamma$ subunit deficiency       | Mucopolidosis type 3 $\gamma$                                                                                             | AR  | <i>GNPTG</i>  | 607838 |
| Mucolin 1 deficiency                                                           | Mucopolidosis type 4                                                                                                      | AR  | <i>MCOLN1</i> | 605248 |
| <b>105. Mucopolysaccharidoses</b>                                              |                                                                                                                           |     |               |        |
| $\alpha$ -iduronidase deficiency                                               | Mucopolysaccharidosis type 1H, Hurler syndrome (severe); mucopolysaccharidosis type 1S, Scheie syndrome (milder)          | AR  | <i>IDUA</i>   | 252800 |
| Iduronate sulfatase deficiency                                                 | Mucopolysaccharidosis type 2; Hunter syndrome                                                                             | XLR | <i>IDS</i>    | 300823 |
| Heparan N-sulfatase deficiency                                                 | Mucopolysaccharidosis type 3A; Sanfilippo syndrome type A                                                                 | AR  | <i>SGSH</i>   | 605270 |

|                                                                                                                                |                                                                                                           |    |                |        |
|--------------------------------------------------------------------------------------------------------------------------------|-----------------------------------------------------------------------------------------------------------|----|----------------|--------|
| N-acetylglucosaminidase deficiency                                                                                             | Mucopolysaccharidosis type 3B; Sanfilippo syndrome type B                                                 | AR | <i>NAGLU</i>   | 609701 |
| Heparan- $\alpha$ -glucosaminide N-acetyltransferase deficiency                                                                | Mucopolysaccharidosis type 3C, Sanfilippo syndrome type C (severe), retinitis pigmentosa type 73 (milder) | AR | <i>HGSNAT</i>  | 610453 |
| N-acetylglucosamine 6-sulfatase deficiency                                                                                     | Mucopolysaccharidosis type 3D; Sanfilippo syndrome type D                                                 | AR | <i>GNS</i>     | 607664 |
| N-acetylgalactosamine 6-sulfatase deficiency                                                                                   | Mucopolysaccharidosis type 4A; Morquio syndrome type A                                                    | AR | <i>GALNS</i>   | 612222 |
| $\beta$ -galactosidase deficiency, Morquio syndrome phenotype                                                                  | Mucopolysaccharidosis type 4B                                                                             | AR | <i>GLB1</i>    | 611458 |
| N-acetylgalactosamine 4-sulfatase deficiency                                                                                   | Mucopolysaccharidosis type 6; Maroteaux-Lamy syndrome; arylsulfatase B deficiency                         | AR | <i>ARSB</i>    | 611542 |
| $\beta$ -glucuronidase deficiency                                                                                              | Mucopolysaccharidosis type 7; Sly syndrome                                                                | AR | <i>GUSB</i>    | 611499 |
| Hyaluronidase deficiency                                                                                                       | Mucopolysaccharidosis type 9; Natowicz syndrome                                                           | AR | <i>HYAL1</i>   | 607071 |
| Mucopolysaccharidosis-plus syndrome                                                                                            |                                                                                                           | AR | <i>VPS33A</i>  | 610034 |
| <b>106. Disorders of lysosomal cholesterol metabolism</b>                                                                      |                                                                                                           |    |                |        |
| Niemann-Pick disease type C1                                                                                                   |                                                                                                           | AR | <i>NPC1</i>    | 607623 |
| Niemann-Pick disease type C2                                                                                                   |                                                                                                           | AR | <i>NPC2</i>    | 601015 |
| Lysosomal acid lipase deficiency                                                                                               | Wolman disease (severe); cholesteryl ester storage disease (milder)                                       | AR | <i>LIPA</i>    | 613497 |
| <b>107. Disorders of lysosomal transport or sorting</b>                                                                        |                                                                                                           |    |                |        |
| Cystinosis deficiency                                                                                                          | Cystinosis                                                                                                | AR | <i>CTNS</i>    | 606272 |
| Sialin deficiency                                                                                                              | Infantile sialic acid storage disease (severe); Salla disease (milder)                                    | AR | <i>SLC17A5</i> | 604322 |
| Glucocerebrosidase receptor deficiency                                                                                         | Progressive myoclonic epilepsy type 4; action myoclonus-renal failure syndrome                            | AR | <i>SCARB2</i>  | 602257 |
| See also: Methylmalonic aciduria and homocystinuria, cblF and cblJ types in group 26, and mucopolipidosis type 4 in group 104. |                                                                                                           |    |                |        |
| <b>108. Disorders of lysosomal protein degradation</b>                                                                         |                                                                                                           |    |                |        |
| Cathepsin K deficiency                                                                                                         | Pycnodysostosis                                                                                           | AR | <i>CTSK</i>    | 601105 |
| Cathepsin C deficiency                                                                                                         | Papillon-Lefevre syndrome; Haim-Munk syndrome                                                             | AR | <i>CTSC</i>    | 602365 |
| See also: Cathepsin D and F deficiencies in group 101, and cathepsin A deficiency in group 103.                                |                                                                                                           |    |                |        |
| <b>H. DISORDERS OF PEROXISOMES AND OXALATE</b>                                                                                 |                                                                                                           |    |                |        |
| <b>109. Disorders of plasmalogen synthesis</b>                                                                                 |                                                                                                           |    |                |        |
| PTS2 receptor deficiency                                                                                                       | Rhizomelic chondrodysplasia punctata type 1 (severe); classic Refsum disease type 2 (milder)              | AR | <i>PEX7</i>    | 601757 |

|                                                                     |                                                                                                                                                                             |        |                |        |
|---------------------------------------------------------------------|-----------------------------------------------------------------------------------------------------------------------------------------------------------------------------|--------|----------------|--------|
| Glycerone 3-phosphate acyltransferase deficiency                    | Rhizomelic chondrodysplasia punctata type 2                                                                                                                                 | AR     | <i>GNPAT</i>   | 602744 |
| Alkylglycerone 3-phosphate synthase deficiency                      | Rhizomelic chondrodysplasia punctata type 3                                                                                                                                 | AR     | <i>AGPS</i>    | 603051 |
| Fatty Acyl-CoA reductase 1 (FAR1) deficiency                        |                                                                                                                                                                             | AR     | <i>FAR1</i>    | 616107 |
| Peroxin 5 long isoform deficiency                                   | Rhizomelic chondrodysplasia punctata type 5                                                                                                                                 | AR     | <i>PEX5</i>    | 600414 |
| <b>110. Disorders of peroxisomal <math>\beta</math>-oxidation</b>   |                                                                                                                                                                             |        |                |        |
| X-linked adrenoleukodystrophy                                       |                                                                                                                                                                             | XLR    | <i>ABCD1</i>   | 300371 |
| Peroxisomal straight-chain acyl-CoA oxidase deficiency              | Pseudo-neonatal adrenoleukodystrophy                                                                                                                                        | AR     | <i>ACOX1</i>   | 609751 |
| D-bifunctional protein deficiency                                   | Pseudo-Zellweger syndrome (severe); Perrault syndrome type 1 (milder)                                                                                                       | AR     | <i>HSD17B4</i> | 601860 |
| L-bifunctional protein deficiency                                   | Fanconi renotubular syndrome type 3                                                                                                                                         | AR     | <i>EHHADH</i>  | 607037 |
| Sterol carrier protein-2 deficiency                                 | Leukoencephalopathy with dystonia and motor neuropathy                                                                                                                      | AR     | <i>SCP2</i>    | 184755 |
| See also: $\alpha$ -methylacyl-CoA racemase deficiency in group 97. |                                                                                                                                                                             |        |                |        |
| <b>111. Disorder of peroxisomal <math>\alpha</math>-oxidation</b>   |                                                                                                                                                                             |        |                |        |
| Phytanoyl-CoA hydroxylase deficiency                                | Classic Refsum disease                                                                                                                                                      | AR     | <i>PHYH</i>    | 602026 |
| See also: PTS2 receptor deficiency in group 109.                    |                                                                                                                                                                             |        |                |        |
| <b>112. Disorders of peroxisomal biogenesis</b>                     |                                                                                                                                                                             |        |                |        |
| Peroxin 1 deficiency                                                | Peroxisome biogenesis disorder 1A (Zellweger syndrome); peroxisome biogenesis disorder 1B (neonatal adrenoleukodystrophy/infantile Refsum disease); Heimler syndrome type 1 | AR     | <i>PEX1</i>    | 602136 |
| Peroxin 2 deficiency                                                | Peroxisome biogenesis disorder 5A (severe); peroxisome biogenesis disorder 5B (milder)                                                                                      | AR     | <i>PEX2</i>    | 170993 |
| Peroxin 3 deficiency                                                | Peroxisome biogenesis disorder 10A (severe); peroxisome biogenesis disorder 10B (milder)                                                                                    | AR     | <i>PEX3</i>    | 603164 |
| Peroxin 5 deficiency                                                | Peroxisome biogenesis disorder 2A (severe); peroxisome biogenesis disorder 2B (milder)                                                                                      | AR     | <i>PEX5</i>    | 600414 |
| Peroxin 6 deficiency                                                | Peroxisome biogenesis disorder 5A (severe); peroxisome biogenesis disorder 5B (intermediate); Heimler syndrome type 2 (milder)                                              | AD, AR | <i>PEX6</i>    | 601498 |

|                                                                                                    |                                                                                             |     |                |        |
|----------------------------------------------------------------------------------------------------|---------------------------------------------------------------------------------------------|-----|----------------|--------|
| Peroxin 10 deficiency                                                                              | Peroxisome biogenesis disorder 6A (severe);<br>peroxisome biogenesis disorder 6B (milder)   | AR  | <i>PEX10</i>   | 602859 |
| Peroxin 11B deficiency                                                                             | Peroxisome biogenesis disorder 14B                                                          | AR  | <i>PEX11B</i>  | 603867 |
| Peroxin 12 deficiency                                                                              | Peroxisome biogenesis disorder 3A (severe);<br>peroxisome biogenesis disorder 3B (milder)   | AR  | <i>PEX12</i>   | 601758 |
| Peroxin 13 deficiency                                                                              | Peroxisome biogenesis disorder 11A (severe);<br>peroxisome biogenesis disorder 11B (milder) | AR  | <i>PEX13</i>   | 601789 |
| Peroxin 14 deficiency                                                                              | Peroxisome biogenesis disorder 13A                                                          | AR  | <i>PEX14</i>   | 601791 |
| Peroxin 16 deficiency                                                                              | Peroxisome biogenesis disorder 8A (severe);<br>peroxisome biogenesis disorder 8B (milder)   | AR  | <i>PEX16</i>   | 603360 |
| Peroxin 19 deficiency                                                                              | Peroxisome biogenesis disorder 12A                                                          | AR  | <i>PEX19</i>   | 600279 |
| Peroxin 26 deficiency                                                                              | Peroxisome biogenesis disorder 7A (severe);<br>peroxisome biogenesis disorder 7B (milder)   | AR  | <i>PEX26</i>   | 608666 |
| <b>113. Peroxisomal disorders not involving lipid metabolism</b>                                   |                                                                                             |     |                |        |
| Catalase deficiency                                                                                | Acatlasemia                                                                                 | AR  | <i>CAT</i>     | 115500 |
| Alanine-glyoxylate aminotransferase deficiency                                                     | Primary hyperoxaluria type 1                                                                | AR  | <i>AGXT</i>    | 604285 |
| Hydroxyacid oxidase 1 deficiency                                                                   | Glycolate oxidase deficiency; isolated glycolic aciduria                                    | AR  | <i>HAO1</i>    | 605023 |
| <b>114. Disorders of oxalate metabolism</b>                                                        |                                                                                             |     |                |        |
| Glyoxylate reductase/hydroxypyruvate reductase deficiency                                          | Primary hyperoxaluria type 2                                                                | AR  | <i>GRHPR</i>   | 604296 |
| 4-hydroxy-2-oxoglutarate aldolase 1 deficiency                                                     | Primary hyperoxaluria type 3                                                                | AR  | <i>HOGA1</i>   | 613597 |
| Oxalate transporter deficiency                                                                     |                                                                                             | AR  | <i>SLC26A1</i> | 610130 |
| See also: Alanine-glyoxylate aminotransferase and hydroxyacid oxidase 1 deficiencies in group 113. |                                                                                             |     |                |        |
| <b>I. CONGENITAL DISORDERS OF GLYCOSYLATION</b>                                                    |                                                                                             |     |                |        |
| <b>115. Disorders of N-linked glycosylation</b>                                                    |                                                                                             |     |                |        |
| Phosphomannomutase 2 deficiency                                                                    | PMM2-CDG                                                                                    | AR  | <i>PMM2</i>    | 601785 |
| Phosphomannose isomerase deficiency                                                                | MPI-CDG                                                                                     | AR  | <i>MPI</i>     | 154550 |
| N-acetylglucosamine-1-phosphate transferase deficiency                                             | DPAGT1-CDG                                                                                  | AR  | <i>DPAGT1</i>  | 191350 |
| X-linked recessive UDP-N-acetylglucosamine transferase catalytic subunit deficiency                | ALG13-CDG                                                                                   | XLR | <i>ALG13</i>   | 300776 |



|                                                                                    |                                                                  |        |               |        |
|------------------------------------------------------------------------------------|------------------------------------------------------------------|--------|---------------|--------|
| X-linked dominant UDP-N-acetylglucosamine transferase catalytic subunit deficiency | Early infantile epileptic encephalopathy type 36                 | XLD    | <i>ALG13</i>  | 300776 |
| UDP-N-acetylglucosamine transferase anchoring subunit deficiency                   | ALG14-CDG                                                        | AR     | <i>ALG14</i>  | 612866 |
| ALG1 $\beta$ -1,4-mannosyltransferase deficiency                                   | ALG1-CDG                                                         | AR     | <i>ALG1</i>   | 605907 |
| ALG2 $\alpha$ -1,3/1,6-mannosyltransferase deficiency                              | ALG2-CDG                                                         | AR     | <i>ALG2</i>   | 607905 |
| ALG11 $\alpha$ -1,2-mannosyltransferase deficiency                                 | ALG11-CDG                                                        | AR     | <i>ALG11</i>  | 613666 |
| Lipid-linked oligosaccharide flippase deficiency                                   | RFT1-CDG                                                         | AR     | <i>RFT1</i>   | 611908 |
| ALG3 $\alpha$ -1,3-mannosyltransferase deficiency                                  | ALG3-CDG                                                         | AR     | <i>ALG3</i>   | 608750 |
| ALG9 $\alpha$ -1,2-mannosyltransferase deficiency                                  | ALG9-CDG                                                         | AR     | <i>ALG9</i>   | 606941 |
| ALG12 $\alpha$ -1, 6-mannosyltransferase deficiency                                | ALG12-CDG                                                        | AR     | <i>ALG12</i>  | 607144 |
| ALG6 $\alpha$ -1,3-glucosyltransferase deficiency                                  | ALG6-CDG                                                         | AR     | <i>ALG6</i>   | 604566 |
| ALG8 $\alpha$ -1,3-glucosyltransferase deficiency                                  | ALG8-CDG (recessive); polycystic liver disease type 3 (dominant) | AD, AR | <i>ALG8</i>   | 608103 |
| Oligosaccharyltransferase TUSC3 subunit deficiency                                 | TUSC3-CDG                                                        | AR     | <i>TUSC3</i>  | 601385 |
| Oligosaccharyltransferase STT3A subunit deficiency                                 | STT3A-CDG                                                        | AR     | <i>STT3A</i>  | 601134 |
| Oligosaccharyltransferase MAGT1 subunit deficiency                                 | MAGT1-CDG                                                        | XLR    | <i>MAGT1</i>  | 300715 |
| Translocon-associated protein $\delta$ subunit deficiency                          | SSR4-CDG                                                         | XLR    | <i>SSR4</i>   | 300090 |
| Mannosyl-oligosaccharide $\alpha$ -1,2-glucosidase deficiency                      | MOGS-CDG                                                         | AR     | <i>MOGS</i>   | 601336 |
| $\alpha$ -1,3-glucosidase II subunit $\alpha$ deficiency                           | Polycystic kidney disease type 3                                 | AD     | <i>GANAB</i>  | 104160 |
| $\alpha$ -1,3-glucosidase II subunit $\beta$ deficiency                            | Polycystic liver disease type 1                                  | AD     | <i>PRKCSH</i> | 177060 |
| $\alpha$ -1,2-mannosidase I deficiency                                             | MAN1B1-CDG                                                       | AR     | <i>MAN1B1</i> | 604346 |

|                                                                                 |                                                                                                    |    |                 |        |
|---------------------------------------------------------------------------------|----------------------------------------------------------------------------------------------------|----|-----------------|--------|
| $\beta$ -1,2-N-acetylglucosaminyltransferase II deficiency                      | MGAT2-CDG                                                                                          | AR | <i>MGAT2</i>    | 602616 |
| $\alpha$ -1,6-fucosyltransferase deficiency                                     | FUT8-CDG                                                                                           | AR | <i>FUT8</i>     | 602589 |
| <b>116. Disorders of O-mannosylation</b>                                        |                                                                                                    |    |                 |        |
| Protein O-mannosyltransferase 1 deficiency                                      | MDDGA1 (severe); MDDGB1 (intermediate); MDDGC1 (milder)                                            | AR | <i>POMT1</i>    | 607423 |
| Protein O-mannosyltransferase 2 deficiency                                      | MDDGA2; MDDGB2; MDDGC2                                                                             | AR | <i>POMT2</i>    | 607439 |
| Protein O-mannose $\beta$ -1,2-N-acetylglucosaminyltransferase deficiency       | MDDGA3; MDDGB3; MDDGC3; retinitis pigmentosa type 76                                               | AR | <i>POMGNT1</i>  | 606822 |
| Protein O-mannose $\beta$ -1,4-N-acetylglucosaminyltransferase deficiency       | MDDGA8                                                                                             | AR | <i>POMGNT2</i>  | 614828 |
| $\beta$ -1,3-galactosaminyltransferase 2 deficiency                             | MDDGA11                                                                                            | AR | <i>B3GALNT2</i> | 610194 |
| Protein O-mannose kinase deficiency                                             | MDDGA12; MDDGC12                                                                                   | AR | <i>POMK</i>     | 615247 |
| Methylerythritol 4-phosphate cytidyltransferase deficiency                      | MDDGA7; MDDGC7                                                                                     | AR | <i>ISPD</i>     | 614631 |
| Fukutin deficiency                                                              | MDDGA4; MDDGB4; MDDGC4                                                                             | AR | <i>FKTN</i>     | 607440 |
| Fukutin-related protein deficiency                                              | MDDGA5; MDDGB5; MDDGC5                                                                             | AR | <i>FKRP</i>     | 606596 |
| Ribitol $\beta$ -1,4-xylosyltransferase deficiency                              | MDDGA10                                                                                            | AR | <i>RXYLT1</i>   | 605862 |
| $\beta$ -1,4-glucuronyltransferase 1 deficiency                                 | MDDGA13                                                                                            | AR | <i>B4GAT1</i>   | 605517 |
| $\beta$ -1,3-glucuronyltransferase/ $\alpha$ -1,3-xylosyltransferase deficiency | MDDGA6; MDDGB6                                                                                     | AR | <i>LARGE1</i>   | 603590 |
| <b>117. Disorders of O-xylosylation and glycosaminoglycan synthesis</b>         |                                                                                                    |    |                 |        |
| Xylosyltransferase 1 deficiency                                                 | Desbuquois dysplasia type 2                                                                        | AR | <i>XYLT1</i>    | 608124 |
| Xylosyltransferase 2 deficiency                                                 | Spondyloocular syndrome                                                                            | AR | <i>XYLT2</i>    | 608125 |
| $\beta$ -1,4-galactosyltransferase 7 deficiency                                 | Progeroid Ehlers-Danlos syndrome type 1; Larsen of Reunion Island syndrome                         | AR | <i>B4GALT7</i>  | 604327 |
| $\beta$ -1,3-galactosyltransferase 6 deficiency                                 | Spondyloepimetaphyseal dysplasia with joint laxity type 1; progeroid Ehlers-Danlos syndrome type 2 | AR | <i>B3GALT6</i>  | 615291 |
| $\beta$ -1,3-glucuronyltransferase 3 deficiency                                 | Larsen-like syndrome                                                                               | AR | <i>B3GAT3</i>   | 606374 |
| Exostosin glycosyltransferase 1 deficiency                                      | Multiple hereditary exostoses type 1                                                               | AD | <i>EXT1</i>     | 608177 |
| Exostosin glycosyltransferase 2 deficiency                                      | Multiple hereditary exostoses type 2                                                               | AD | <i>EXT2</i>     | 608210 |
| Exostosin-like glycosyltransferase 3 deficiency                                 | Immunoskeletal dysplasia with neurodevelopmental abnormalities                                     | AR | <i>EXTL3</i>    | 605744 |

|                                                                                                   |                                                                                                                 |         |                  |        |
|---------------------------------------------------------------------------------------------------|-----------------------------------------------------------------------------------------------------------------|---------|------------------|--------|
| Chondroitin sulfate synthase 1 deficiency                                                         | Temtamy preaxial brachydactyly syndrome                                                                         | AR      | <i>CHSY1</i>     | 608183 |
| Chondroitin 6-sulfotransferase deficiency                                                         | Autosomal recessive Larsen syndrome;<br>spondyloepiphyseal dysplasia Omani type;<br>humero-spinal dysostosis    | AR      | <i>CHST3</i>     | 603799 |
| Dermatan 4-sulfotransferase 1 deficiency                                                          | Ehlers-Danlos syndrome musculocontractural type 1                                                               | AR      | <i>CHST14</i>    | 608429 |
| Dermatan sulfate epimerase deficiency                                                             | Ehlers-Danlos syndrome musculocontractural type 2                                                               | AR      | <i>DSE</i>       | 605942 |
| Corneal N-acetylglucosamine 6-O-sulfotransferase deficiency                                       | Macular corneal dystrophy                                                                                       | AR      | <i>CHST6</i>     | 605294 |
| UDP-galactose nucleotidase deficiency                                                             | Desbuquois dysplasia type 1; multiple epiphyseal dysplasia type 7                                               | AR      | <i>CANT1</i>     | 613165 |
| Sulfate transporter deficiency                                                                    | Achondrogenesis type 1; atelosteogenesis type 2;<br>diastrophic dysplasia; multiple epiphyseal dysplasia type 4 | AR      | <i>SLC26A2</i>   | 606718 |
| Phosphoadenosine 5'-phosphosulfate synthetase 2 deficiency                                        | Spondyloepimetaphyseal dysplasia, Pakistani type                                                                | AR      | <i>PAPSS2</i>    | 603005 |
| Golgi-resident phosphoadenosine phosphate phosphatase deficiency                                  | Chondrodysplasia with joint dislocations, gPAPP type                                                            | AR      | <i>IMPAD1</i>    | 614010 |
| See also: UDP-glucuronic acid/UDP-N-acetylgalactosamine dual transporter deficiency in group 127. |                                                                                                                 |         |                  |        |
| <b>118. Disorders of O-GalNAcylation</b>                                                          |                                                                                                                 |         |                  |        |
| Polypeptide N-acetylgalactosaminyltransferase 3 deficiency                                        | Hyperphosphatemic familial tumoral calcinosis type 1; hyperostosis-hyperphosphatemia syndrome                   | AR      | <i>GALNT3</i>    | 601756 |
| Core 1 $\beta$ -1,3-galactosyltransferase chaperone deficiency                                    | Tn polyagglutination syndrome                                                                                   | Somatic | <i>C1GALT1C1</i> | 300611 |
| <b>119. Disorders of O-GlcNAcylation</b>                                                          |                                                                                                                 |         |                  |        |
| O-linked N-acetylglucosamine transferase deficiency                                               | X-linked mental retardation type 106                                                                            | XLR     | <i>OGT</i>       | 300255 |
| EGF domain-specific O-linked N-acetylglucosamine transferase deficiency                           | Adams-Oliver syndrome type 4                                                                                    | AR      | <i>EOGT</i>      | 614789 |
| <b>120. Disorder of O-glycosylation</b>                                                           |                                                                                                                 |         |                  |        |
| Protein O-glycosyltransferase deficiency                                                          | Dowling-Degos disease type 4                                                                                    | AD      | <i>POGLUT1</i>   | 615618 |
| <b>121. Disorders of O-fucosylation</b>                                                           |                                                                                                                 |         |                  |        |
| Protein O-fucosyltransferase deficiency                                                           | Dowling-Degos disease type 2                                                                                    | AD      | <i>POFUT1</i>    | 607491 |

|                                                                         |                                                                                                                                                    |     |                |        |
|-------------------------------------------------------------------------|----------------------------------------------------------------------------------------------------------------------------------------------------|-----|----------------|--------|
| Fucose-specific $\beta$ -1,3-N-acetylglucosaminyltransferase deficiency | Spondylocostal dysostosis type 3                                                                                                                   | AR  | <i>LFNG</i>    | 602576 |
| Fucose-specific $\beta$ -1,3-glucosyltransferase deficiency             | Peters-Plus syndrome                                                                                                                               | AR  | <i>B3GLCT</i>  | 610308 |
| <b>122. Disorders of glycosylphosphatidylinositol biosynthesis</b>      |                                                                                                                                                    |     |                |        |
| PIGA-CDG                                                                | Multiple congenital anomalies-hypotonia-seizures syndrome type 2; GPI biosynthesis defect type 4; early infantile epileptic encephalopathy type 20 | XLR | <i>PIGA</i>    | 311770 |
| PIGC-CDG                                                                | GPI biosynthesis defect type 16; autosomal recessive mental retardation type 62                                                                    | AR  | <i>PIGC</i>    | 601730 |
| PIGQ-CDG                                                                |                                                                                                                                                    | AR  | <i>PIGQ</i>    | 605754 |
| PIGL-CDG                                                                | CHIME syndrome; GPI biosynthesis defect type 5                                                                                                     | AR  | <i>PIGL</i>    | 605947 |
| PIGW-CDG                                                                | Hyperphosphatasia with mental retardation type 5; GPI biosynthesis defect type 11                                                                  | AR  | <i>PIGW</i>    | 610275 |
| PIGM-CDG                                                                | GPI biosynthesis defect type 1                                                                                                                     | AR  | <i>PIGM</i>    | 610273 |
| PIGV-CDG                                                                | Hyperphosphatasia with mental retardation type 1; GPI biosynthesis defect type 2                                                                   | AR  | <i>PIGV</i>    | 610274 |
| PIGN-CDG                                                                | Multiple congenital anomalies-hypotonia-seizures syndrome type 1; GPI biosynthesis defect type 3                                                   | AR  | <i>PIGN</i>    | 606097 |
| PIGO-CDG                                                                | Hyperphosphatasia with mental retardation type 2; GPI biosynthesis defect type 6                                                                   | AR  | <i>PIGO</i>    | 614730 |
| PIGG-CDG                                                                | Autosomal recessive mental retardation type 53; GPI biosynthesis defect type 13                                                                    | AR  | <i>PIGG</i>    | 616918 |
| PIGT-CDG                                                                | Multiple congenital anomalies-hypotonia-seizures syndrome type 3, GPI biosynthesis defect type 7                                                   | AR  | <i>PIGT</i>    | 610272 |
| GPAA1-CDG                                                               | GPI biosynthesis defect type 15                                                                                                                    | AR  | <i>GPAA1</i>   | 603048 |
| PGAP1-CDG                                                               | Autosomal recessive mental retardation type 42; GPI biosynthesis defect type 9                                                                     | AR  | <i>PGAP1</i>   | 611655 |
| PGAP3-CDG                                                               | Hyperphosphatasia with mental retardation type 4; GPI biosynthesis defect type 10                                                                  | AR  | <i>PGAP3</i>   | 611801 |
| PGAP2-CDG                                                               | Hyperphosphatasia with mental retardation type 3; GPI biosynthesis defect type 8                                                                   | AR  | <i>PGAP2</i>   | 615187 |
| <b>123. Disorders of glycolipid glycosylation</b>                       |                                                                                                                                                    |     |                |        |
| GM3 synthase deficiency                                                 | Amish infantile epilepsy syndrome; salt and pepper developmental regression syndrome                                                               | AR  | <i>ST3GAL5</i> | 604402 |

|                                                                                        |                                                                  |        |                 |        |
|----------------------------------------------------------------------------------------|------------------------------------------------------------------|--------|-----------------|--------|
| GM2/GD2 synthase deficiency                                                            | Autosomal recessive spastic paraplegia type 26                   | AR     | <i>B4GALNT1</i> | 601873 |
| GD1a/GT1b synthase deficiency                                                          | ST3GAL3-CDG                                                      | AR     | <i>ST3GAL3</i>  | 606494 |
| GB3 synthase deficiency                                                                | NOR polyagglutination syndrome                                   | AD     | <i>A4GALT</i>   | 607922 |
| <b>124. Disorders of dolichol metabolism</b>                                           |                                                                  |        |                 |        |
| Cis-isoprenyl transferase deficiency                                                   |                                                                  | AD, AR | <i>DHDDS</i>    | 608172 |
| Nogo-B receptor deficiency                                                             |                                                                  | AD, AR | <i>NUS1</i>     | 610463 |
| Polyprenol reductase deficiency                                                        | SRD5A3-CDG                                                       | AR     | <i>SRD5A3</i>   | 611715 |
| Dolichol kinase deficiency                                                             | DOLK-CDG                                                         | AR     | <i>DOLK</i>     | 610746 |
| Dolichol-phosphate mannose synthase subunit 1 deficiency                               | DPM1-CDG                                                         | AR     | <i>DPM1</i>     | 603503 |
| Dolichol-phosphate mannose synthase subunit 2 deficiency                               | DPM2-CDG                                                         | AR     | <i>DPM2</i>     | 603564 |
| Dolichol-phosphate mannose synthase subunit 3 deficiency                               | DPM3-CDG                                                         | AR     | <i>DPM3</i>     | 605951 |
| MPDU1-CDG                                                                              |                                                                  | AR     | <i>MPDU1</i>    | 604041 |
| <b>125. Disorders of monosaccharide synthesis and interconversion</b>                  |                                                                  |        |                 |        |
| UDP-N-acetylglucosamine-2-epimerase/N-acetylmannosamine kinase deficiency              | GNE myopathy; Nonaka myopathy                                    | AR     | <i>GNE</i>      | 603824 |
| UDP-N-acetylglucosamine-2-epimerase/N-acetylmannosamine kinase superactivity           | Sialuria                                                         | AD     | <i>GNE</i>      | 603824 |
| N-acetylneuraminic acid-9-phosphate synthase deficiency                                | NANS-CDG; spondyloepimetaphyseal dysplasia Camera-Genevieve type | AR     | <i>NANS</i>     | 605202 |
| Glutamine:fructose-6-phosphate transaminase deficiency                                 | Congenital myasthenic syndrome type 12                           | AR     | <i>GFPT1</i>    | 138292 |
| Phosphoglucomutase 1 deficiency                                                        | PGM1-CDG; glycogen storage disease type 14                       | AR     | <i>PGM1</i>     | 171900 |
| N-Acetylglucosamine-phosphate mutase deficiency                                        | PGM3-CDG; immunodeficiency type 23                               | AR     | <i>PGM3</i>     | 172100 |
| Glucose-6-phosphatase catalytic subunit 3 deficiency                                   | Severe congenital neutropenia type 4; Dursun syndrome            | AR     | <i>G6PC3</i>    | 611045 |
| See also: Phosphomannomutase 2 and phosphomannose isomerase deficiencies in group 115. |                                                                  |        |                 |        |
| <b>126. Disorders of nucleotide-sugar synthesis</b>                                    |                                                                  |        |                 |        |
| GDP-mannose pyrophosphorylase $\alpha$ subunit deficiency                              | Alacrima, achalasia, and mental retardation syndrome             | AR     | <i>GMPPA</i>    | 615495 |

|                                                                           |                                                          |     |                 |        |
|---------------------------------------------------------------------------|----------------------------------------------------------|-----|-----------------|--------|
| GDP-mannose pyrophosphorylase $\beta$ subunit deficiency                  | MDDGA14; MDDGB14; MDDGC14                                | AR  | <i>GMPPB</i>    | 615320 |
| See also: CAD trifunctional protein deficiency in group 1.                |                                                          |     |                 |        |
| <b>127. Disorders of Golgi transport</b>                                  |                                                          |     |                 |        |
| CMP-sialic acid transporter deficiency                                    | SLC35A1-CDG                                              | AR  | <i>SLC35A1</i>  | 605634 |
| UDP-galactose transporter deficiency                                      | SLC35A2-CDG; early infantile epileptic encephalopathy 22 | XLD | <i>SLC35A2</i>  | 314375 |
| UDP-N-acetylglucosamine transporter deficiency                            | SLC35A3-CDG                                              | AR  | <i>SLC35A3</i>  | 605632 |
| GDP-fucose transporter deficiency                                         | SLC35C1-CDG                                              | AR  | <i>SLC35C1</i>  | 605881 |
| UDP-glucuronic acid/UDP-N-acetylgalactosamine dual transporter deficiency | Schneckenbecken dysplasia; SLC35D1-CDG                   | AR  | <i>SLC35D1</i>  | 610804 |
| See also: SLC39A8 deficiency in group 42.                                 |                                                          |     |                 |        |
| <b>128. Glycosylation disorders of vesicular trafficking</b>              |                                                          |     |                 |        |
| Conserved oligomeric Golgi complex subunit 1 deficiency                   | COG1-CDG                                                 | AR  | <i>COG1</i>     | 606973 |
| Conserved oligomeric Golgi complex subunit 4 deficiency                   | COG4-CDG                                                 | AR  | <i>COG4</i>     | 606976 |
| Conserved oligomeric Golgi complex subunit 5 deficiency                   | COG5-CDG                                                 | AR  | <i>COG5</i>     | 606821 |
| Conserved oligomeric Golgi complex subunit 6 deficiency                   | COG6-CDG                                                 | AR  | <i>COG6</i>     | 606977 |
| Conserved oligomeric Golgi complex subunit 7 deficiency                   | COG7-CDG                                                 | AR  | <i>COG7</i>     | 606978 |
| Conserved oligomeric Golgi complex subunit 8 deficiency                   | COG8-CDG                                                 | AR  | <i>COG8</i>     | 606979 |
| Jagunal 1 deficiency                                                      | Severe congenital neutropenia type 6                     | AR  | <i>JAGN1</i>    | 616012 |
| Congenital dyserythropoietic anemia type 2                                | SEC23B-CDG                                               | AR  | <i>SEC23B</i>   | 610512 |
| Achondrogenesis type 1A                                                   |                                                          | AR  | <i>TRIP11</i>   | 604505 |
| TRAPPC11-CDG                                                              | Limb-girdle muscular dystrophy type 2S                   | AR  | <i>TRAPPC11</i> | 614138 |
| Cohen syndrome                                                            |                                                          | AR  | <i>VPS13B</i>   | 607817 |

| <b>129. Disorders of Golgi homeostasis</b> |                                                                |     |                 |        |
|--------------------------------------------|----------------------------------------------------------------|-----|-----------------|--------|
| ATP6V0A2-CDG                               | Autosomal recessive cutis laxa type 2A (wrinkly skin syndrome) | AR  | <i>ATP6V0A2</i> | 611716 |
| ATP6V1A-CDG                                | Autosomal recessive cutis laxa type 2D                         | AR  | <i>ATP6V1A</i>  | 607027 |
| ATP6V1E1-CDG                               | Autosomal recessive cutis laxa type 2C                         | AR  | <i>ATP6V1E1</i> | 108746 |
| ATP6AP1-CDG                                | Immunodeficiency type 47                                       | XLR | <i>ATP6AP1</i>  | 300197 |
| ATP6AP2-CDG                                | X-linked mental retardation, Hedera type                       | XLR | <i>ATP6AP2</i>  | 300556 |
| Transmembrane protein 199 deficiency       | TMEM199-CDG                                                    | AR  | <i>TMEM199</i>  | 616815 |
| CCDC115-CDG                                |                                                                | AR  | <i>CCDC115</i>  | 613734 |
| Transmembrane protein 165 deficiency       | TMEM165-CDG                                                    | AR  | <i>TMEM165</i>  | 614726 |
| <b>130. Disorder of deglycosylation</b>    |                                                                |     |                 |        |
| N-glycanase 1 deficiency                   | NGLY1-CDDG                                                     | AR  | <i>NGLY1</i>    | 610661 |

Abbreviations: AD, autosomal dominant; adPEO, autosomal dominant progressive external ophthalmoplegia; AR, autosomal recessive; arPEO, autosomal recessive progressive external ophthalmoplegia; GPI, glycosylphosphatidylinositol; Mit, mitochondrial; MDDGA, muscular dystrophy-dystroglycanopathy with brain and eye anomalies (type A, includes Walker-Warburg syndrome and muscle-eye-brain disease); MDDGB, muscular dystrophy-dystroglycanopathy with mental retardation (type B); MDDGC, limb-girdle muscular dystrophy-dystroglycanopathy (type C); XL, X-linked; XLD, X-linked dominant; XLR, X-linked recessive.
